# Supplementary material for: CoH-catalyzed asymmetric remote hydroalkylation of heterocyclic alkenes: a rapid approach to chiral five-membered S- and O-heterocycles
Source: Royal Society of Chemistry journal article supplement (doi:10.1039/d4sc01149j), 2024-01-01

## Supporting Information

# CoH-Catalyzed Asymmetric Remote Hydroalkylation of Heterocyclic Alkenes: A Rapid Approach to Chiral Five-Membered S- and O-Heterocycles

Lingzi Zhao,<sup>#</sup> Feipeng Liu,<sup>#</sup> Yan Zhuang, Mengyang Shen, Jing Xue, Xuchao Wang,  
Yuting Zhang and Zi-Qiang Rong\*

Frontiers Science Center for Flexible Electronics (FSCFE), Shaanxi Institute of Flexible Electronics  
(SIFE) & Shaanxi Institute of Biomedical Materials and Engineering (SIBME), Northwestern  
Polytechnical University (NPU), 127 West Youyi Road, Xi'an 710072, P. R. China.

Email: iamzqrong@nwpu.edu.cn

### Table of Contents

|                                                                                                                     |     |
|---------------------------------------------------------------------------------------------------------------------|-----|
| <i>General Information</i>                                                                                          | S2  |
| <i>Optimization of the reaction conditions</i>                                                                      | S3  |
| <i>General procedures for cobalt-catalyzed enantioselective hydroalkylation of 2,5-dihydrothiophene 1,1-dioxide</i> | S7  |
| <i>General procedures for cobalt-catalyzed enantioselective hydroalkylation of 2,5-Dihydrofuran</i>                 | S21 |
| <i>Transformations of products</i>                                                                                  | S32 |
| <i>Mechanistic Experiments</i>                                                                                      | S33 |
| <i>References</i>                                                                                                   | S39 |
| <i>X-ray Crystallographic data for (S)-3p</i>                                                                       | S40 |
| <i><sup>1</sup>H NMR, <sup>13</sup>C NMR, and <sup>19</sup>F NMR spectra</i>                                        | S42 |

## ***General Information***

Unless noted otherwise, all solvents were dried by filtration through a Pure-Solv MD-5 Solvent Purification System (Innovative Technology). Sensitive reagents and solvents were transferred under nitrogen into a nitrogen-filled glovebox with standard techniques. Analytical thin-layer chromatography (TLC) was carried out using 0.2 mm commercial silica gel plates (silica gel 60, F254, Leyan chemical). High resolution mass spectra (HRMS) were recorded on Thermo Scientific Exactive Plus (EMR) with a quadrupole mass analyzer. Nuclear magnetic resonance spectra ( $^1\text{H}$  NMR,  $^2\text{H}$  NMR,  $^{13}\text{C}$  NMR and  $^{19}\text{F}$  NMR) were recorded with a Bruker Model DMX 500 (500 MHz,  $^1\text{H}$  at 500 MHz,  $^{13}\text{C}$  at 126 MHz). Chemical shifts were reported in parts per million (ppm,  $\delta$ ), downfield from tetramethylsilane (TMS,  $\delta=0.00\text{ppm}$ ) and were referenced to residual solvent ( $\text{CDCl}_3$ ,  $\delta=7.26\text{ ppm}$  ( $^1\text{H}$ ) and 77.00 ppm ( $^{13}\text{C}$ ), or  $\text{DMSO}-d_6$ ,  $\delta=2.50\text{ ppm}$  ( $^1\text{H}$ )). All the  $^{19}\text{F}$  chemical shifts were not referenced. Coupling constants were reported in Hertz (Hz). Data for  $^1\text{H}$  NMR spectra were reported as follows: chemical shift (ppm, referenced to protium, s = singlet, d = doublet, t = triplet, q = quartet, quin = quintet, dd = doublet of doublets, td = triplet of doublets, ddd = doublet of doublet of doublets, m = multiplet, coupling constant (Hz), and integration). Commercially available materials were obtained from Rhawn Corporation, Leyan, Aladdin Bio-Chem Technology or Energy chemical and were used as received.

## Optimization of the reaction conditions

### Cobalt-catalyzed enantioselective hydroalkylation of 2,5-dihydrothiophene 1,1-dioxide:

Table S1. Screening of chiral ligands<sup>a,b,c</sup>

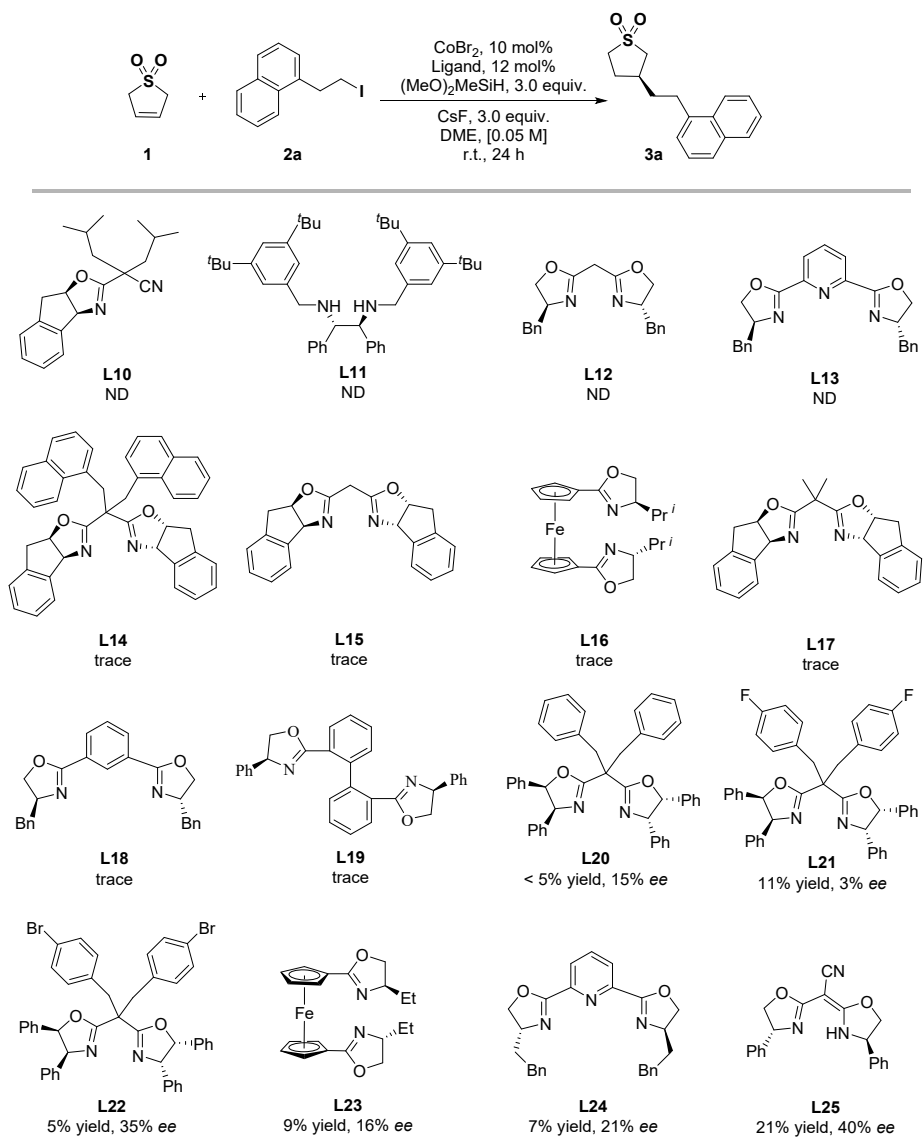

<sup>a</sup>Conditions: **1** (0.1 mmol, 1.0 equiv.), **2a** (0.2 mmol, 2.0 equiv.), CoBr<sub>2</sub> (10 mol%), Ligand (12 mol%), DMMS (0.3 mmol, 3.0 equiv.), CsF (0.3 mmol, 3.0 equiv.), DME (2.0 mL, 0.05 M), r.t., 24 h. <sup>b</sup>Isolated yields. <sup>c</sup>The enantiomeric ratio were determined by HPLC analysis with a chiral column. Abbreviations: DME, 1,2-dimethoxyethane. DMMS, dimethoxymethylsilane. ND, no detected.

**Table S2. Screening of base<sup>a,b,c</sup>**
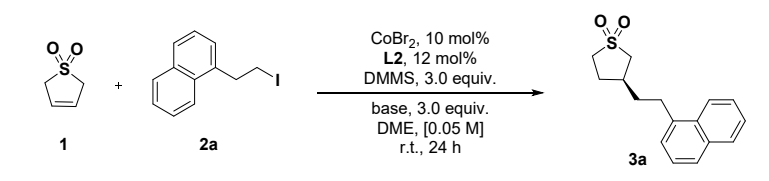

| entry | Base                                             | yield (%) | ee (%) |
|-------|--------------------------------------------------|-----------|--------|
| 1     | KF                                               | 32        | 66     |
| 2     | Cs <sub>2</sub> CO <sub>3</sub>                  | 28        | 69     |
| 3     | K <sub>3</sub> PO <sub>4</sub>                   | 19        | 38     |
| 4     | K <sub>3</sub> PO <sub>4</sub> ·H <sub>2</sub> O | 19        | 38     |
| 5     | NaF                                              | trace     | -      |
| 6     | K <sub>2</sub> HPO <sub>4</sub>                  | trace     | -      |
| 7     | KH <sub>2</sub> PO <sub>4</sub>                  | trace     | -      |

<sup>a</sup>Conditions: **1** (0.1 mmol, 1.0 equiv.), **2a** (0.2 mmol, 2.0 equiv.), CoBr<sub>2</sub> (10 mol%), Ligand (12 mol%), DMMS (0.3 mmol, 3.0 equiv.), base (0.3 mmol, 3.0 equiv.), DME (2.0 mL, 0.05 M), r.t., 24 h. <sup>b</sup>Isolated yields. <sup>c</sup>The enantiomeric ratio were determined by HPLC analysis with a chiral column. Abbreviations: DME, 1,2-dimethoxyethane. DMMS, dimethoxymethylsilane.

**Table S3. Screening of [Co]<sup>a,b,c</sup>**
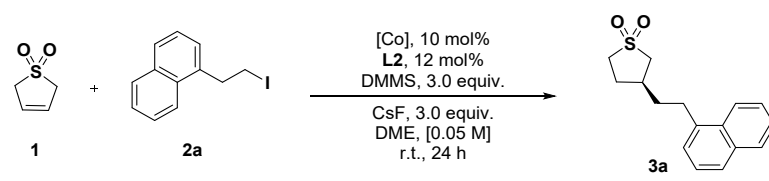

| entry | [Co]                                                 | yield (%) | ee (%) |
|-------|------------------------------------------------------|-----------|--------|
| 1     | CoI <sub>2</sub>                                     | 33        | 65     |
| 2     | CoBr <sub>2</sub> ·glyme                             | 27        | 56     |
| 3     | CoCl <sub>2</sub>                                    | 19        | 27     |
| 4     | CoCl <sub>2</sub> (PPh <sub>3</sub> ) <sub>2</sub>   | <10       | 17     |
| 5     | Co(OAc) <sub>2</sub>                                 | trace     | -      |
| 6     | Bis(acetylacetonato)cobalt                           | trace     | -      |
| 7     | (PPh <sub>3</sub> ) <sub>3</sub> CoCl <sub>2</sub>   | trace     | -      |
| 8     | Co(OAc) <sub>2</sub> (H <sub>2</sub> O) <sub>4</sub> | trace     | -      |

<sup>a</sup>Conditions: **1** (0.1 mmol, 1.0 equiv.), **2a** (0.2 mmol, 2.0 equiv.), [Co] (10 mol%), L2 (12 mol%), DMMS (0.3 mmol, 3.0 equiv.), CsF (0.3 mmol, 3.0 equiv.), DME (2.0 mL, 0.05 M), r.t., 24 h. <sup>b</sup>Isolated yields. <sup>c</sup>The enantiomeric ratio were determined by HPLC analysis with a chiral column. Abbreviations: DME, 1,2-dimethoxyethane. DMMS, dimethoxymethylsilane.

**Table S4. Screening of reductant<sup>a,b,c</sup>**

| entry | reductant                | yield (%) | ee (%) |
|-------|--------------------------|-----------|--------|
| 1     | (EtO) <sub>2</sub> MeSiH | 34        | 80     |
| 2     | (MeO) <sub>3</sub> SiH   | 23        | 81     |
| 3     | (EtO) <sub>3</sub> SiH   | trace     | -      |
| 4     | Me <sub>2</sub> PhSiH    | trace     | -      |
| 5     | Et <sub>3</sub> SiH      | trace     | -      |
| 6     | Ph <sub>3</sub> SiH      | trace     | -      |
| 7     | Cl <sub>3</sub> SiH      | trace     | -      |
| 8     | HBpin                    | trace     | -      |

<sup>a</sup>Conditions: **1** (0.1 mmol, 1.0 equiv.), **2a** (0.2 mmol, 2.0 equiv.), CoBr<sub>2</sub> (10 mol%), L2 (12 mol%), reductant (0.3 mmol, 3.0 equiv.), CsF (0.3 mmol, 3.0 equiv.), DME (2.0 mL, 0.05 M), r.t., 24 h. <sup>b</sup>Isolated yields. <sup>c</sup>The enantiomeric ratio were determined by HPLC analysis with a chiral column. Abbreviations: HBpin, Pinacolborane. DME, 1,2-dimethoxyethane.

**Table S5. Screening of solvent<sup>a,b,c</sup>**

| entry | solvent         | yield (%) | ee (%) |
|-------|-----------------|-----------|--------|
| 1     | 1,4-dioxane     | 33        | 80     |
| 2     | THF             | trace     | -      |
| 3     | CPME            | trace     | -      |
| 4     | TBME            | trace     | -      |
| 5     | PhOMe           | trace     | -      |
| 6     | Isopropyl ether | trace     | -      |

<sup>a</sup>Conditions: **1** (0.1 mmol, 1.0 equiv.), **2a** (0.2 mmol, 2.0 equiv.), CoBr<sub>2</sub> (10 mol%), L2 (12 mol%), DMMS (0.3 mmol, 3.0 equiv.), CsF (0.3 mmol, 3.0 equiv.), solvent (2.0 mL, 0.05 M), r.t., 24 h. <sup>b</sup>Isolated yields. <sup>c</sup>The enantiomeric ratio were determined by HPLC analysis with a chiral column. Abbreviations: CPME, Cyclopentyl methyl ether. TBME, *tert*-butyl methyl ether. DMMS, dimethoxymethylsilane.

**Table S6. Screening of amount of the temperature<sup>a,b,c</sup>**

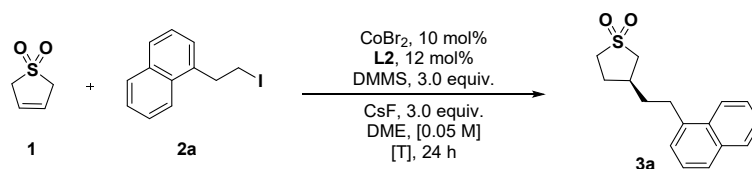

| entry    | T(°C) | yield (%) | ee (%) |
|----------|-------|-----------|--------|
| <b>1</b> | 40    | 12        | 52     |
| 2        | 25    | 39        | 83     |
| 3        | 0     | 32        | 91     |
| <b>4</b> | -20   | 73        | 96     |
| 5        | -40   | 49        | 90     |

<sup>a</sup>Conditions: **1** (0.1 mmol, 1.0 equiv), **2a** (0.2 mmol, 2.0 equiv),  $\text{CoBr}_2$  (10 mol%), **L2** (12 mol%), DMMS (0.3 mmol, 3.0 equiv), DME (2.0 mL, 0.05 M), T, 24 h. <sup>b</sup>Isolated yields. <sup>c</sup>The enantiomeric ratio were determined by HPLC analysis with a chiral column. Abbreviations: DME, 1,2-dimethoxyethane. DMMS, dimethoxymethylsilane.

**Table S7. Screening of amount of the silane<sup>a,b,c</sup>**

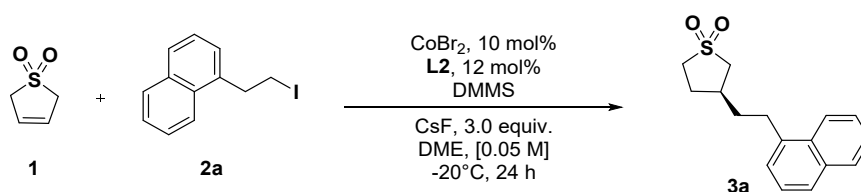

| entry    | DMMS       | yield (%) | ee (%) |
|----------|------------|-----------|--------|
| <b>1</b> | 1.0 equiv. | 22        | 92     |
| 2        | 2.0 equiv. | 21        | 92     |
| <b>3</b> | 3.0 equiv. | 73        | 96     |
| 4        | 4.0 equiv. | 45        | 93     |

<sup>a</sup>Conditions: **1** (0.1 mmol, 1.0 equiv.), **2a** (0.2 mmol, 2.0 equiv),  $\text{CoBr}_2$  (10 mol%), **L2** (12 mol%), CsF (0.3 mmol, 3.0 equiv.), DME (2.0 mL, 0.05 M), -20 °C, 24 h. <sup>b</sup>Isolated yields. <sup>c</sup>The enantiomeric ratio were determined by HPLC analysis with a chiral column. Abbreviations: DME, 1,2-dimethoxyethane. DMMS, dimethoxymethylsilane.

**General procedures for cobalt-catalyzed enantioselective hydroalkylation of 2,5-dihydrothiophene 1,1-dioxide**

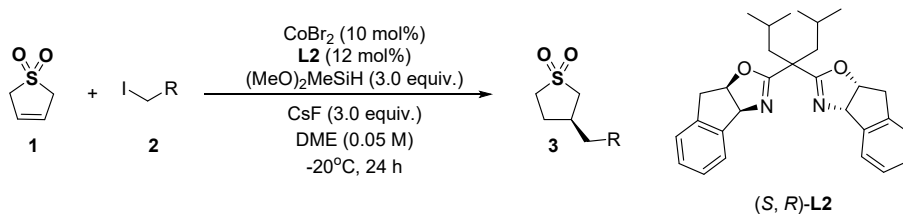

To an oven-dried 10 mL Schlenk tube containing a stirring bar was charged with  $\text{CoBr}_2$  (4.4 mg, 0.02 mmol, 10 mol%), (S, R)-L9 (13.1 mg, 0.024 mmol, 12 mol%) and 2.0 mL dry 1,2-dimethoxyethane in a nitrogen-filled glovebox, the mixture was stirred for 10 min at room temperature. Then 2,5-dihydrothiophene 1,1-dioxide **1** (0.2 mmol, 1.0 equiv.), alkyl iodides **2** (0.4 mmol, 2.0 equiv.), CsF (91.1 mg, 0.6 mmol, 3.0 equiv.) and another 2.0 mL dry 1,2-dimethoxyethane were added sequentially. The tube was sealed and removed from the glovebox,  $(\text{MeO})_2\text{MeSiH}$  (63.7 mg, 0.6 mmol, 3.0 equiv.) was added dropwise at  $-20^\circ\text{C}$  and the reaction was stirred at  $-20^\circ\text{C}$  for 24 h. After the reaction was completed, the reaction mixture was diluted with saturated  $\text{NH}_4\text{Cl}$  (aq., 2.0 mL) and EtOAc (5 mL). The aqueous phase was extracted with EtOAc ( $2 \times 5$  mL). The organic phase was dried over  $\text{Na}_2\text{SO}_4$ , filtered, and the solvent removed in vacuo. The crude mixture was purified by flash column chromatography on silica gel using a mixture of Hexane/EtOAc as eluent to obtain the desired product.

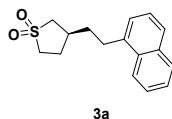

The title compound was synthesized according to general procedure A, the product **3a** was purified by flash column chromatography (PE: EA = 3:1) as a yellow oil (73% yield) with 96% *ee*.

**$^1\text{H NMR}$**  (500 MHz,  $\text{CDCl}_3$ )  $\delta$  7.95-7.93 (m, 1H), 7.88-7.86 (m, 1H), 7.75-7.73 (m, 1H), 7.54-7.47 (m, 2H), 7.42-7.38 (m, 1H), 7.29-7.28 (m, 1H), 3.29 (dd,  $J = 13.1, 7.6$  Hz, 1H), 3.23-3.17 (m, 1H), 3.13-3.10 (m, 2H), 3.05-2.99 (m, 1H), 2.74-2.69 (m, 1H), 2.55-2.44 (m, 1H), 2.41-2.35 (m, 1H), 2.00-1.94 (m, 2H), 1.94 – 1.83 (m, 1H).  **$^{13}\text{C NMR}$**  (126 MHz,  $\text{CDCl}_3$ )  $\delta$  136.8, 134.0, 131.5, 129.1, 127.3, 126.1, 126.0, 125.7, 125.6, 123.3, 56.9, 52.2, 36.6, 35.6, 30.9, 29.2.

**HRMS (ESI)**: Calculated for  $(\text{C}_{16}\text{H}_{19}\text{O}_2\text{S}^+)$   $[\text{M}+\text{H}]^+$ : 275.1100, found: 275.1100.

$[\alpha]_D^{25} = -14.8^\circ$  ( $c = 1.0$ ,  $\text{CHCl}_3$ ).

**HPLC** (UltiMate 3000): Daicel Chiralpak IC Column (*n*-Hexane/*i*-PrOH = 30 : 70, 1.0 mL/min),  $30^\circ\text{C}$ , 220 nm,  $R_t = 21.562$  min (minor) and 23.735 min (major).

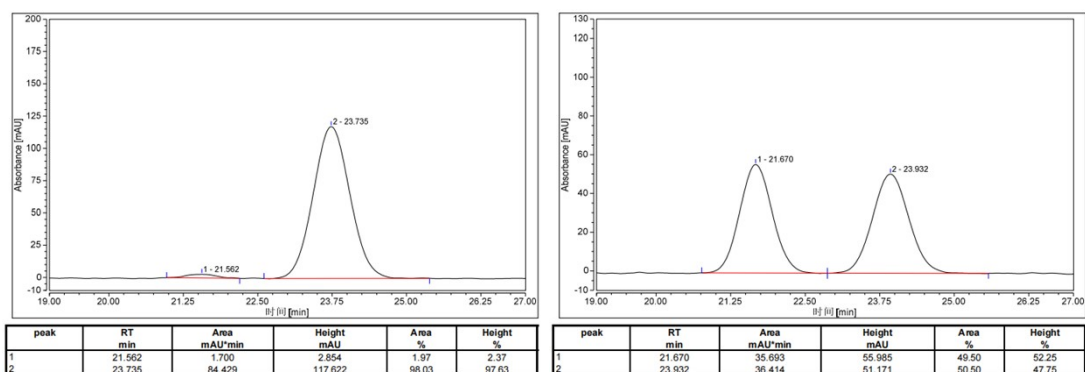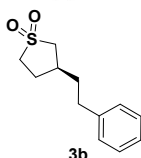

The title compound was synthesized according to general procedure A, the product **3b** was purified by flash column chromatography (PE: EA = 3:1) as a white solid (56% yield) with 90% *ee*. m.p. 49-52 °C.

<sup>1</sup>H NMR (500 MHz, CDCl<sub>3</sub>) δ 7.31 – 7.28 (m, 2H), 7.23 – 7.20 (m, 1H), 7.18 – 7.12 (m, 2H), 3.27 – 3.15 (m, 2H), 3.04 – 2.97 (m, 1H), 2.70 – 2.63 (m, 3H), 2.45 – 2.31 (m, 2H), 1.90 – 1.81 (m, 3H). <sup>13</sup>C NMR (126 MHz, CDCl<sub>3</sub>) δ 140.7, 128.7, 128.2, 126.4, 56.9, 52.2, 36.3, 36.2, 33.6, 29.2.

**HRMS (ESI)**: Calculated for (C<sub>12</sub>H<sub>16</sub>NaO<sub>2</sub>S<sup>+</sup>) [M+Na]<sup>+</sup>: 247.0763, found: 247.0767.

[α]<sub>D</sub><sup>25</sup> = -12.9° (c = 1.0, CHCl<sub>3</sub>).

**HPLC** (UltiMate 3000): Daicel Chiralpak AD-H Column (*n*-Hexane/*i*-PrOH = 80 : 20, 1.0 mL/min), 30 °C, 220 nm, Rt = 7.870 min (minor) and 8.612 min (major).

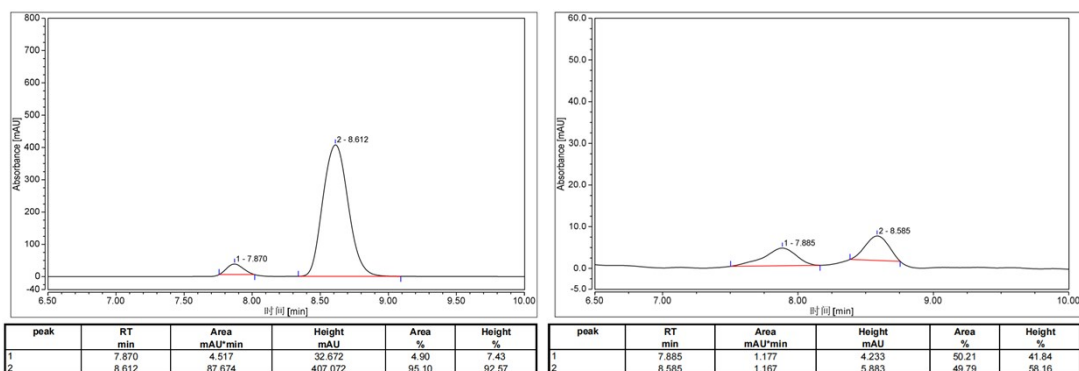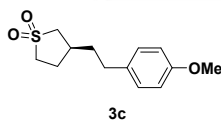

The title compound was synthesized according to general procedure A, the product **3c** was purified by flash column chromatography (PE: EA = 3:1) as a colorless oil (70% yield) with 89% *ee*.

<sup>1</sup>H NMR (500 MHz, CDCl<sub>3</sub>) δ 7.11 – 7.02 (m, 2H), 6.88 – 6.79 (m, 2H), 3.79 (s, 3H), 3.24 – 3.15 (m, 2H), 3.02 – 2.96 (m, 1H), 2.69 – 2.58 (m, 3H), 2.43 – 2.29 (m, 2H), 1.89 – 1.74 (m, 3H). <sup>13</sup>C NMR (126 MHz, CDCl<sub>3</sub>) δ 158.2, 132.7, 129.1, 114.1, 56.9, 55.3, 52.2, 36.5, 36.1, 32.7, 29.1.



**HRMS (ESI):** Calculated for (C<sub>13</sub>H<sub>18</sub>NaO<sub>3</sub>S<sup>+</sup>) [M+Na]<sup>+</sup>: 277.0869, found 277.0868.

[α]<sub>D</sub><sup>25</sup> = -30.2° (c = 1.0, CHCl<sub>3</sub>).

**HPLC (UltiMate 3000):** Daicel Chiralpak IE Column (*n*-Hexane/*i*-PrOH = 70 : 30, 1.0 mL/min), 30 °C, 220 nm, Rt = 21.268 min (major) and 24.372 min (minor).

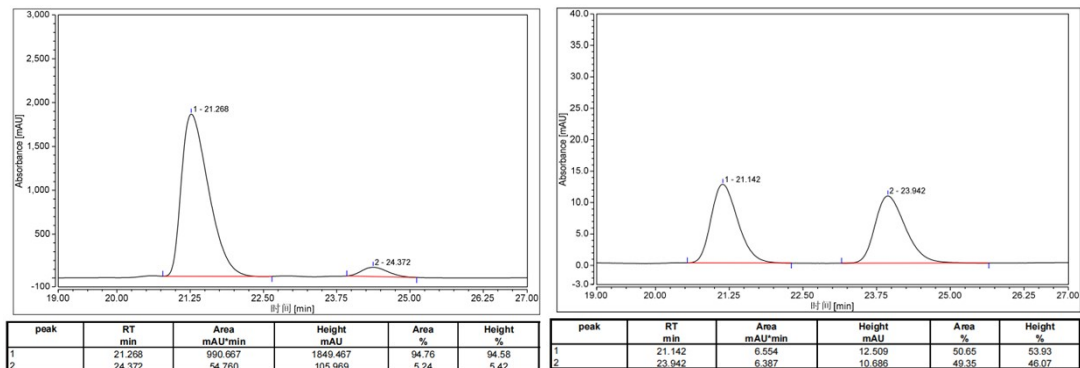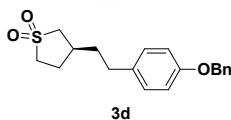

The title compound was synthesized according to general procedure A, the product **3d** was purified by flash column chromatography (PE: EA = 3:1) as a white solid (96% yield) with 91% *ee*. m.p. 102-104 °C.

<sup>1</sup>H NMR (500 MHz, CDCl<sub>3</sub>) δ 7.43 (d, J = 7.1 Hz, 2H), 7.41 – 7.34 (m, 2H), 7.35 – 7.30 (m, 1H), 7.11 – 7.02 (m, 2H), 6.96 – 6.86 (m, 2H), 5.04 (s, 2H), 3.25 – 3.14 (m, 2H), 3.03-2.97 (m, 1H), 2.69 – 2.55 (m, 3H), 2.44 – 2.29 (m, 2H), 1.87-1.78 (m, 3H). <sup>13</sup>C NMR (126 MHz, CDCl<sub>3</sub>) δ 157.4, 137.1, 133.0, 129.2, 128.6, 128.0, 127.5, 115.1, 70.1, 56.9, 52.2, 36.5, 36.2, 32.7, 29.2.

**HRMS (ESI):** Calculated for (C<sub>19</sub>H<sub>22</sub>NaO<sub>3</sub>S<sup>+</sup>) [M+Na]<sup>+</sup>: 353.1182, found 353.1191.

[α]<sub>D</sub><sup>25</sup> = -101.2 (c = 1.0, CHCl<sub>3</sub>).

**HPLC (UltiMate 3000):** Daicel Chiralpak IF-3 Column (*n*-Hexane/*i*-PrOH = 70 : 30, 1.0 mL/min), 30 °C, 220 nm, Rt = 29.048 min (minor) and 30.153 min (major).

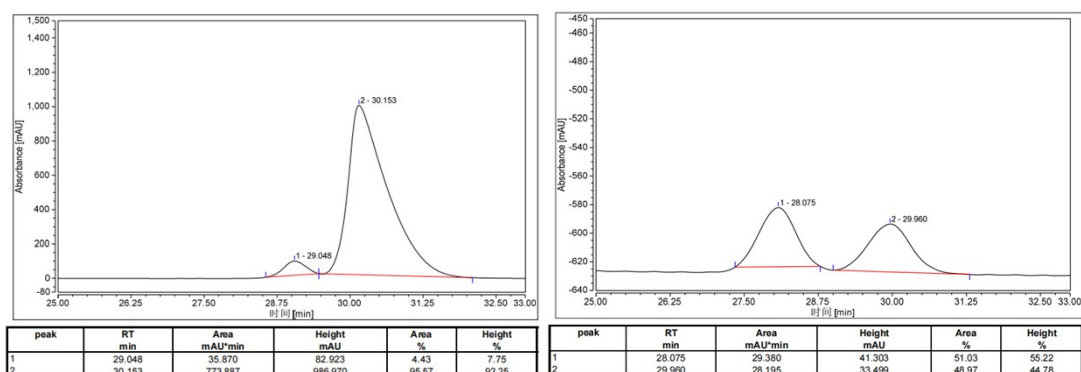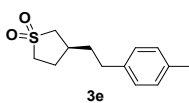

The title compound was synthesized according to general procedure A, the product **3e** was purified by flash column chromatography (PE: EA = 3:1) as a yellow solid (60% yield) with 92% *ee*. m.p. 88-90 °C.

<sup>1</sup>H NMR (500 MHz, CDCl<sub>3</sub>) δ 7.10 (d, *J* = 7.8 Hz, 2H), 7.04 (d, *J* = 7.7 Hz, 2H), 3.27-3.11 (m, 2H), 3.02-2.96 (m, 1H), 2.70-2.56 (m, 3H), 2.43-2.37 (m, 1H), 2.32 (s, 4H), 1.88-1.79 (m, 3H). <sup>13</sup>C NMR (126 MHz, CDCl<sub>3</sub>) δ 137.5, 135.9, 129.3, 128.1, 56.9, 52.2, 36.4, 36.2, 33.2, 29.1, 21.0.

**HRMS (ESI)**: Calculated for (C<sub>13</sub>H<sub>18</sub>NaO<sub>2</sub>S<sup>+</sup>) [M+Na]<sup>+</sup>: 261.0920, found 261.0929.

[α]<sub>D</sub><sup>25</sup> = -20.3° (c = 1.0, CHCl<sub>3</sub>).

**HPLC (UltiMate 3000)**: Daicel Chiralpak AD-H Column (*n*-Hexane/*i*-PrOH = 90 : 10, 1.0 mL/min), 30 °C, 220 nm, R<sub>t</sub> = 12.693 min (minor) and 13.707 min (major).

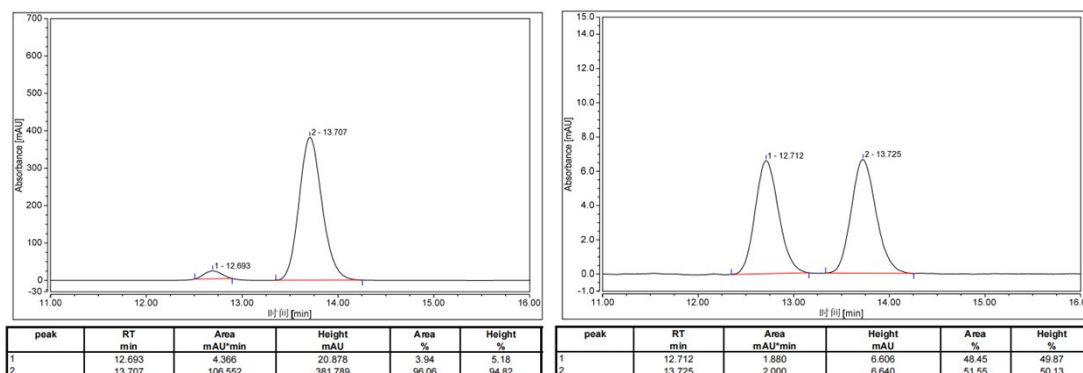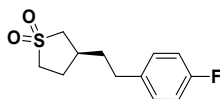

**3f**

The title compound was synthesized according to general procedure A, the product **3f** was purified by flash column chromatography (PE: EA = 3:1) as a yellow oil (56% yield) with 91% *ee*.

<sup>1</sup>H NMR (500 MHz, CDCl<sub>3</sub>) δ 7.11 (dd, *J* = 8.4, 5.3 Hz, 2H), 6.98 (t, *J* = 8.5 Hz, 2H), 3.29 - 3.15 (m, 2H), 3.04-2.98 (m, 1H), 2.72 - 2.59 (m, 3H), 2.46 - 2.30 (m, 2H), 1.88-1.79 (m, 3H). <sup>13</sup>C NMR (126 MHz, CDCl<sub>3</sub>) δ 161.5 (d, *J* = 244.5 Hz), 136.3 (d, *J* = 3.1 Hz), 129.6 (d, *J* = 7.8 Hz), 115.4 (d, *J* = 21.2 Hz), 56.8, 52.2, 36.4, 36.2, 32.8, 29.1. <sup>19</sup>F NMR (471 MHz, CDCl<sub>3</sub>) δ -116.8.

**HRMS (ESI)**: Calculated for (C<sub>12</sub>H<sub>15</sub>NaFO<sub>2</sub>S<sup>+</sup>) [M+Na]<sup>+</sup>: 265.0669, found 265.0674.

[α]<sub>D</sub><sup>25</sup> = -11.2° (c = 1.0, CHCl<sub>3</sub>).

**HPLC (UltiMate 3000)**: Daicel Chiralpak IE Column (*n*-Hexane/*i*-PrOH = 70 : 30, 1.0 mL/min), 30 °C, 220 nm, R<sub>t</sub> = 16.873 min (major) and 19.453 min (minor).

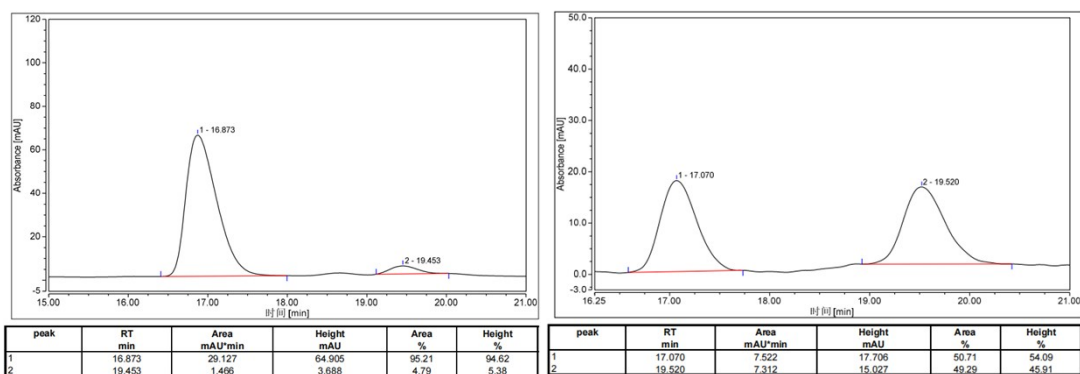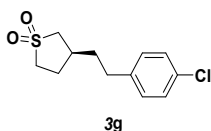

The title compound was synthesized according to general procedure A, the product **3g** was purified by flash column chromatography (PE: EA = 3:1) as a white solid (46% yield) with 91% *ee*. m.p. 101-103 °C.

**<sup>1</sup>H NMR** (500 MHz, CDCl<sub>3</sub>) δ 7.32 (d, *J* = 8.3 Hz, 2H), 7.09 (d, *J* = 8.2 Hz, 2H), 3.26 – 3.17 (m, 2H), 3.05 – 2.97 (m, 1H), 2.71 – 2.61 (m, 3H), 2.44 – 2.33 (m, 2H), 1.92 – 1.78 (m, 3H). 2.71 – 2.48 (m, 2H), 2.30 – 1.98 (m, 2H), 1.80 – 1.75 (m, 1H), 1.71 – 1.51 (m, 2H), 1.30 (d, *J* = 11.3 Hz, 9H). **<sup>13</sup>C NMR** (126 MHz, CDCl<sub>3</sub>) δ 149.2, 137.5, 127.9, 125.6, 56.9, 52.3, 36.2, 34.4, 33.1, 29.1.

**HRMS (ESI)**: Calculated for (C<sub>12</sub>H<sub>16</sub>ClO<sub>2</sub>S<sup>+</sup>) [M+H]<sup>+</sup>: 259.0554, found 259.0556.

[α]<sub>D</sub><sup>25</sup> = -2.9° (c = 1.0, CHCl<sub>3</sub>).

**HPLC** (UltiMate 3000): Daicel Chiralcel OD-H Column (*n*-Hexane/*i*-PrOH = 90 : 10, 1.0 mL/min), 30 °C, 220 nm, Rt = 23.587 min (minor) and 29.625 min (major).

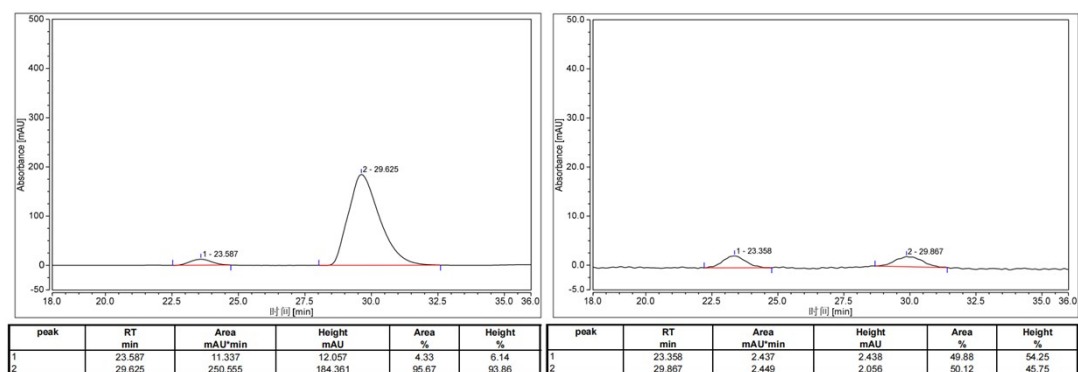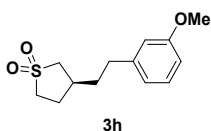

The title compound was synthesized according to general procedure A, the product **3h** was purified by flash column chromatography (PE: EA = 3:1) as a yellow oil (70% yield) with 93% *ee*.

**<sup>1</sup>H NMR** (500 MHz, CDCl<sub>3</sub>) δ 7.22 (t, *J* = 7.9 Hz, 1H), 6.79 – 6.72 (m, 2H), 6.70 (t, *J* = 2.1 Hz, 1H), 3.80 (s,

3H), 3.25-3.17 (m, 2H), 3.06 – 2.93 (m, 1H), 2.66 – 2.61 (m, 2H), 2.48 – 2.38 (m, 1H), 2.38 – 2.32 (m, 1H), 1.89 – 1.81 (m, 3H), 1.30 – 1.21 (m, 1H). <sup>13</sup>C NMR (126 MHz, CDCl<sub>3</sub>) δ 159.9, 142.3, 129.7, 120.6, 114.2, 111.4, 56.9, 55.2, 52.2, 36.2, 36.1, 33.6, 29.1.

**HRMS (ESI):** Calculated for (C<sub>13</sub>H<sub>19</sub>O<sub>3</sub>S<sup>+</sup>) [M+H]<sup>+</sup>: 255.1049, found 255.1057.

[α]<sub>D</sub><sup>25</sup> = -15.1° (c = 1.0, CHCl<sub>3</sub>).

**HPLC (UltiMate 3000):** Daicel Chiralpak IC Column (*n*-Hexane/*i*-PrOH = 70 : 30, 1.0 mL/min), 30 °C, 220 nm, R<sub>t</sub> = 26.707 min (minor) and 28.710 min (major).

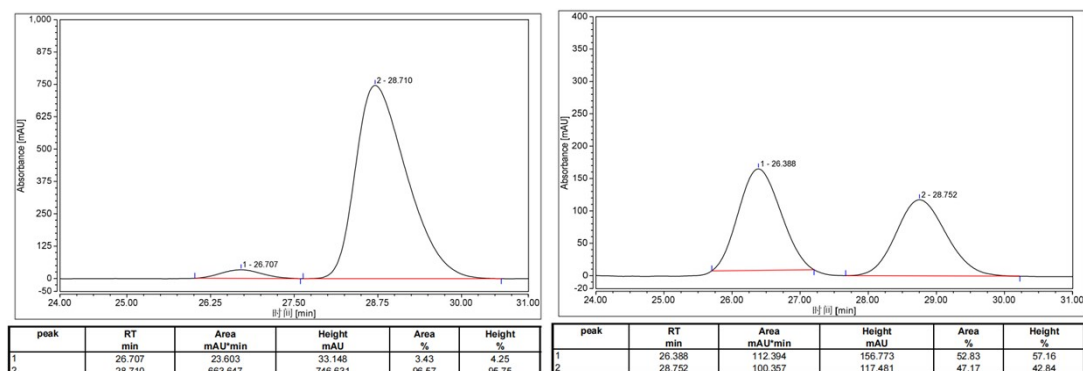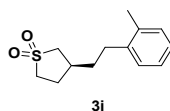

The title compound was synthesized according to general procedure A, the product **3i** was purified by flash column chromatography (PE: EA = 3:1) as a yellow oil (54% yield) with 91% *ee*.

<sup>1</sup>H NMR (500 MHz, CDCl<sub>3</sub>) δ 7.15-7.12 (m, 3H), 7.08 (dd, *J* = 6.6, 2.5 Hz, 1H), 3.30 – 3.26 (m, 1H), 3.24-3.19 (m, 1H), 3.07-3.01 (m, 1H), 2.74 – 2.62 (m, 3H), 2.52 – 2.44 (m, 1H), 2.42 – 2.36 (m, 1H), 2.30 (s, 3H), 1.93 – 1.83 (m, 1H), 1.81 – 1.78 (m, 1H). <sup>13</sup>C NMR (126 MHz, CDCl<sub>3</sub>) δ 138.9, 135.6, 130.5, 128.6, 126.5, 126.2, 56.9, 52.2, 36.7, 35.1, 31.1, 29.2, 19.3.

**HRMS (ESI):** Calculated for (C<sub>13</sub>H<sub>18</sub>NaO<sub>2</sub>S<sup>+</sup>) [M+Na]<sup>+</sup>: 261.0920, found 261.0925.

[α]<sub>D</sub><sup>25</sup> = -9.2° (c = 1.0, CHCl<sub>3</sub>).

**HPLC (UltiMate 3000):** Daicel Chiralcel OD-H Column (*n*-Hexane/*i*-PrOH = 70 : 30, 1.0 mL/min), 30 °C, 220 nm, R<sub>t</sub> = 19.313 min (minor) and 21.385 min (major).

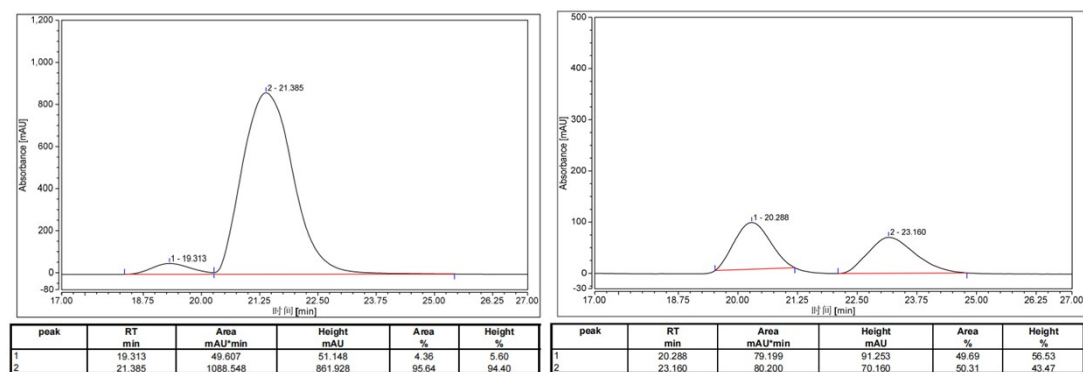

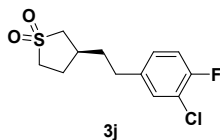

The title compound was synthesized according to general procedure A, the product **3j** was purified by flash column chromatography (PE: EA = 3:1) as a yellow solid (46% yield) with 93% *ee*. m.p. 67-69 °C.

<sup>1</sup>H NMR (500 MHz, CDCl<sub>3</sub>) δ 7.20 (dd, *J* = 7.0, 2.2 Hz, 1H), 7.07 (t, *J* = 8.6 Hz, 1H), 7.02-6.99 (m, 1H), 3.27 – 3.19 (m, 2H), 3.06-3.00 (m, 1H), 2.69 (dd, *J* = 13.0, 10.5 Hz, 1H), 2.64 – 2.60 (m, 2H), 2.44 – 2.34 (m, 2H), 1.98 – 1.72 (m, 3H). <sup>13</sup>C NMR (126 MHz, CDCl<sub>3</sub>) δ 156.8 (d, *J* = 247.4 Hz), 137.7 (d, *J* = 3.9 Hz), 130.2, 127.8 (d, *J* = 6.9 Hz), 121.0 (d, *J* = 17.8 Hz), 116.7 (d, *J* = 20.9 Hz), 56.7, 52.1, 36.1, 36.1, 32.6, 29.1. <sup>19</sup>F NMR (471 MHz, CDCl<sub>3</sub>) δ -119.0.

**HRMS (ESI)**: Calculated for (C<sub>12</sub>H<sub>14</sub>NaClFO<sub>2</sub>S<sup>+</sup>) [M+Na]<sup>+</sup>: 299.0279, found 299.0288.

[α]<sub>D</sub><sup>25</sup> = -6.8° (c = 1.0, CHCl<sub>3</sub>).

**HPLC** (UltiMate 3000): Daicel Chiralpak IB N-5 Column (*n*-Hexane/*i*-PrOH = 70: 30, 1.0 mL/min), 30 °C, 220 nm, R<sub>t</sub> = 19.338 min (minor) and 20.375 min (major).

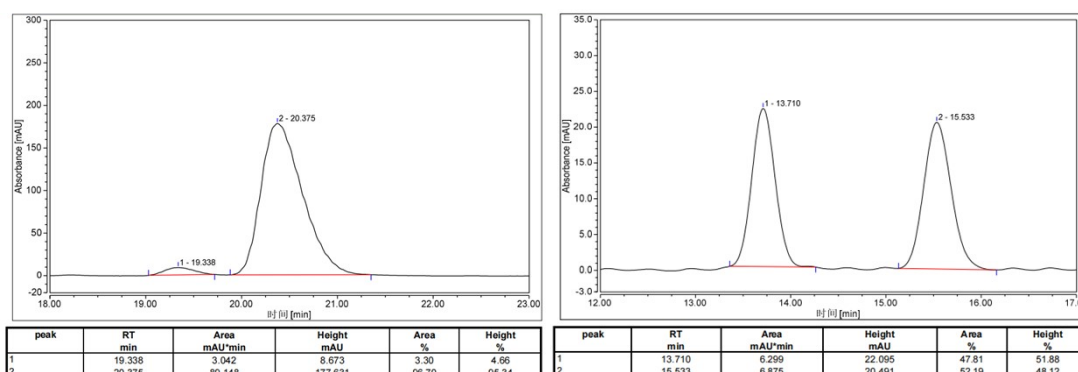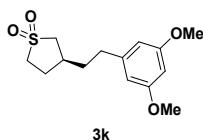

The title compound was synthesized according to general procedure A, the product **3k** was purified by flash column chromatography (PE: EA = 3:1) as a yellow oil (63% yield) with 93% *ee*.

<sup>1</sup>H NMR (500 MHz, CDCl<sub>3</sub>) δ 6.39 – 6.26 (m, 3H), 3.78 (s, 6H), 3.16 (s, 2H), 3.04-2.98 (m, 1H), 2.67 (dd, *J* = 13.1, 10.6 Hz, 1H), 2.64 – 2.55 (m, 2H), 2.47 – 2.30 (m, 2H), 1.90 – 1.78 (m, 3H). <sup>13</sup>C NMR (126 MHz, CDCl<sub>3</sub>) δ 161.0, 143.0, 106.5, 98.0, 56.8, 55.3, 52.2, 36.2, 36.0, 33.9, 29.1.

**HRMS (ESI)**: Calculated for (C<sub>14</sub>H<sub>14</sub>NaO<sub>4</sub>S<sup>+</sup>) [M+Na]<sup>+</sup>: 307.0975, found 307.0984

[α]<sub>D</sub><sup>25</sup> = -18.5° (c = 1.0, CHCl<sub>3</sub>).

**HPLC** (UltiMate 3000): Daicel Chiralpak IA Column (*n*-Hexane/*i*-PrOH = 80 : 20, 1.0 mL/min), 30 °C, 220 nm, R<sub>t</sub> = 14.938 min (minor) and 16.542 min (major).

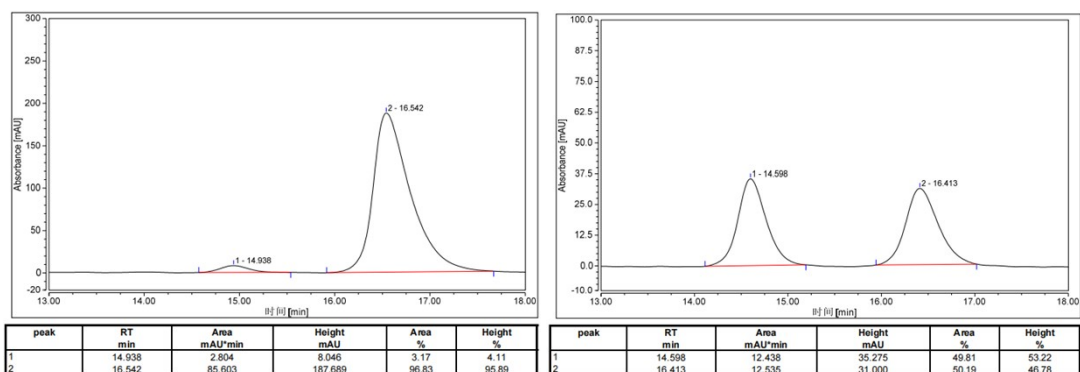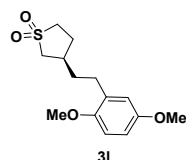

The title compound was synthesized according to general procedure A, the product **31** was purified by flash column chromatography (PE: EA = 3:1) as a yellow oil (56% yield) with 90% *ee*.

<sup>1</sup>H NMR (500 MHz, CDCl<sub>3</sub>) δ 6.77 (d, *J* = 8.8 Hz, 1H), 6.75 – 6.64 (m, 2H), 3.77 (d, *J* = 9.6 Hz, 6H), 3.33 – 3.24 (m, 1H), 3.21 – 3.16 (m, 1H), 3.04 – 2.97 (m, 1H), 2.70 – 2.57 (m, 3H), 2.46 – 2.30 (m, 2H), 1.89 – 1.74 (m, 3H). <sup>13</sup>C NMR (126 MHz, CDCl<sub>3</sub>) δ 153.5, 151.6, 130.4, 116.4, 111.20, 111.18, 57.0, 55.8, 55.7, 52.3, 36.4, 35.0, 29.2, 28.1.

**HRMS (ESI)**: Calculated for (C<sub>14</sub>H<sub>21</sub>O<sub>4</sub>S<sup>+</sup>) [M+H]<sup>+</sup>: 285.1155, found 285.1163.

[α]<sub>D</sub><sup>25</sup> = -21.6° (c = 1.0, CHCl<sub>3</sub>).

**HPLC** (UltiMate 3000): Daicel Chiralpak IB N-5 Column (*n*-Hexane/*i*-PrOH = 70 : 30, 1.0 mL/min), 30 °C, 220 nm, Rt = 18.757 min (minor) and 19.547 min (major).

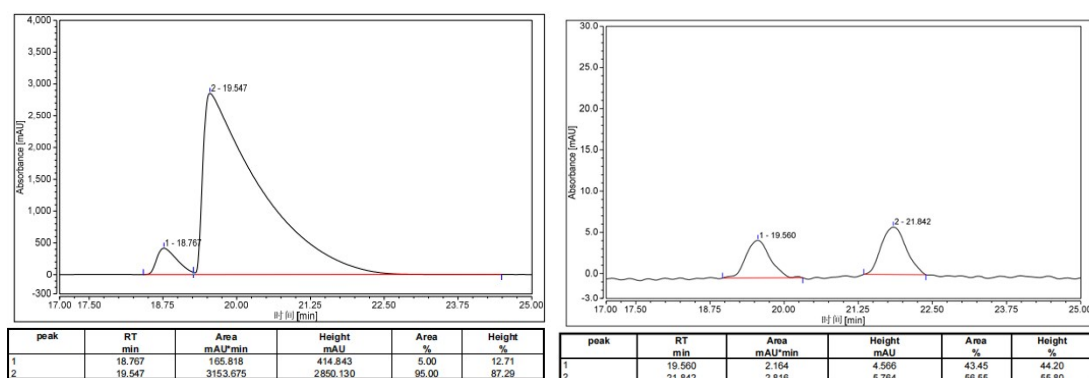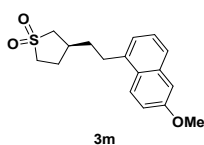

The title compound was synthesized according to general procedure A, the product **3m** was purified by flash column chromatography (PE: EA = 3:1) as a white solid (71% yield) with 92% *ee*. m.p. 96-98

°C.

**<sup>1</sup>H NMR** (500 MHz, CDCl<sub>3</sub>) δ 7.69 – 7.99(m, 2H), 7.51 (d, *J* = 1.7 Hz, 1H), 7.17 – 7.08 (m, 2H), 3.91 (s, 3H), 3.27 – 3.14 (m, 2H), 3.02-2.96 (m, 1H), 2.78 (t, *J* = 7.7 Hz, 2H), 2.69 (dd, *J* = 13.1, 10.7 Hz, 1H), 2.50 – 2.38 (m, 1H), 2.37-2.32 (m, , 1H), 1.93-1.94 (m, 3H), 1.25 (d, *J* = 3.3 Hz, 1H). **<sup>13</sup>C NMR** (126 MHz, CDCl<sub>3</sub>) δ 157.4, 135.8, 133.2, 129.1, 128.9, 127.3, 127.2, 126.3, 119.0, 105.7, 56.9, 55.3, 52.2, 36.3, 36.2, 33.6, 29.2.

**HRMS (ESI)**: Calculated for (C<sub>17</sub>H<sub>20</sub>NaO<sub>3</sub>S<sup>+</sup>) [M+Na]<sup>+</sup>: 327.1025, found 327.1024.

[α]<sub>D</sub><sup>25</sup> = -81.0° (c = 1.0, CHCl<sub>3</sub>).

**HPLC** (UltiMate 3000): Daicel Chiralpak IH-3 Column (*n*-Hexane/*i*-PrOH = 70 : 30, 1.0 mL/min), 30 °C, 220 nm, R<sub>t</sub> = 60.660 min (major) and 75.728 min (minor).

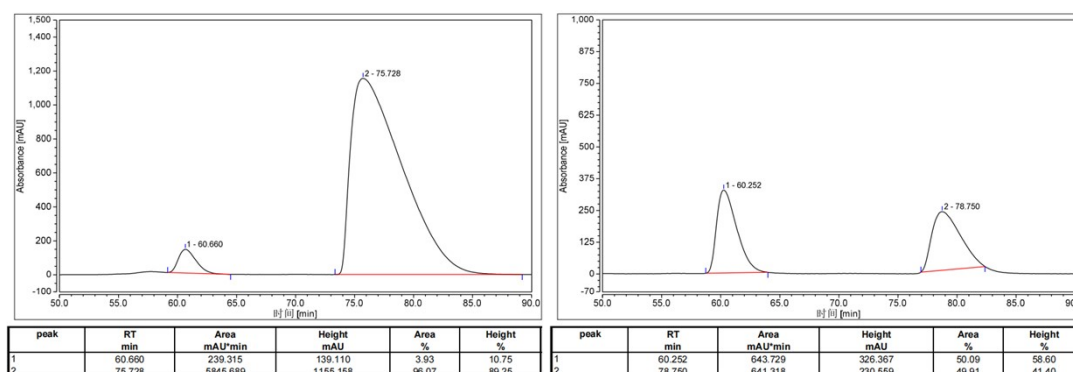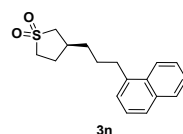

The title compound was synthesized according to general procedure A, the product **3n** was purified by flash column chromatography (PE: EA = 3:1) as a white solid (52% yield) with 89% *ee*. m.p. 63-65 °C.

**<sup>1</sup>H NMR** (500 MHz, CDCl<sub>3</sub>) δ 7.98 (d, *J* = 8.2 Hz, 1H), 7.86 (d, *J* = 7.9 Hz, 1H), 7.73 (d, *J* = 8.2 Hz, 1H), 7.55 – 7.45 (m, 2H), 7.40 (t, *J* = 7.6 Hz, 1H), 7.29 (d, *J* = 7.0 Hz, 1H), 3.25 – 3.14 (m, 2H), 3.09 (t, *J* = 7.6 Hz, 2H), 3.03 - 2.97 (m, 1H), 2.64 (dd, *J* = 13.0, 10.8 Hz, 1H), 2.44 - 2.40 (m, 1H), 2.32 - 2.28 (m, 1H), 1.84 -1.75 (m, 3H), 1.64 – 1.58 (m, 2H). **<sup>13</sup>C NMR** (126 MHz, CDCl<sub>3</sub>) δ 137.6, 134.0, 131.7, 128.9, 126.9, 126.0, 125.9, 125.6, 125.5, 123.5, 57.0, 52.3, 36.8, 34.5, 32.8, 29.1, 28.5.

**HRMS (ESI)**: Calculated for (C<sub>17</sub>H<sub>20</sub>NaO<sub>2</sub>S<sup>+</sup>) [M+Na]<sup>+</sup>: 311.1076, found 311.1086.

[α]<sub>D</sub><sup>25</sup> = -13.7° (c = 1.0, CHCl<sub>3</sub>).

**HPLC** (UltiMate 3000): Daicel Chiralpak IH-3 Column (*n*-Hexane/*i*-PrOH = 70 : 30, 1.0 mL/min), 30 °C, 220 nm, R<sub>t</sub> = 9.682 min (major) and 11.195 min (minor).

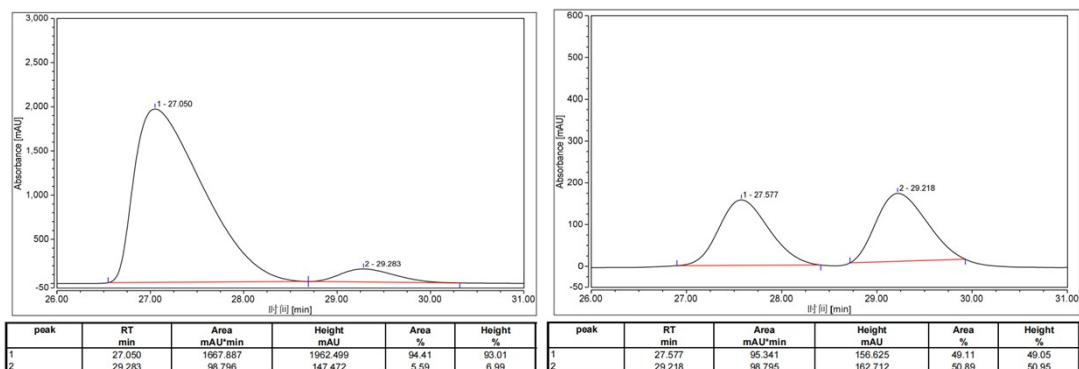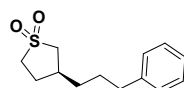

**3o**

The title compound was synthesized according to general procedure A, the product **3o** was purified by flash column chromatography (PE: EA = 1:1) as a colorless oil (84% yield) with 99% *ee*.

<sup>1</sup>H NMR (500 MHz, CDCl<sub>3</sub>) δ 7.29 (t, *J* = 7.5 Hz, 2H), 7.23 – 7.18 (m, 1H), 7.15 (d, *J* = 7.0 Hz, 2H), 3.24 – 3.15 (m, 2H), 3.05 – 2.98 (m, 1H), 2.67v2.60 (m, 3H), 2.46-2.38 (m, 1H), 2.36 – 2.29 (m, 1H), 1.84 – 1.75 (m, 1H), 1.69 – 1.60 (m, 2H), 1.55 – 1.49 (m, 2H). <sup>13</sup>C NMR (126 MHz, CDCl<sub>3</sub>) δ 141.5, 128.5, 128.3, 126.1, 57.0, 52.3, 36.8, 35.6, 34.1, 29.1.

**HRMS (ESI)**: Calculated for (C<sub>13</sub>H<sub>19</sub>O<sub>2</sub>S<sup>+</sup>) [M+H]<sup>+</sup>: 239.1100, found 239.1108.

[α]<sub>D</sub><sup>25</sup> = –21.6° (c = 1.0, CHCl<sub>3</sub>).

**HPLC** (UltiMate 3000): Daicel Chiralpak IC Column (*n*-Hexane/*i*-PrOH = 70 : 30, 1.0 mL/min), 30 °C, 220 nm, *R*<sub>t</sub> = 41.877 min (minor) and 46.515 min (major).

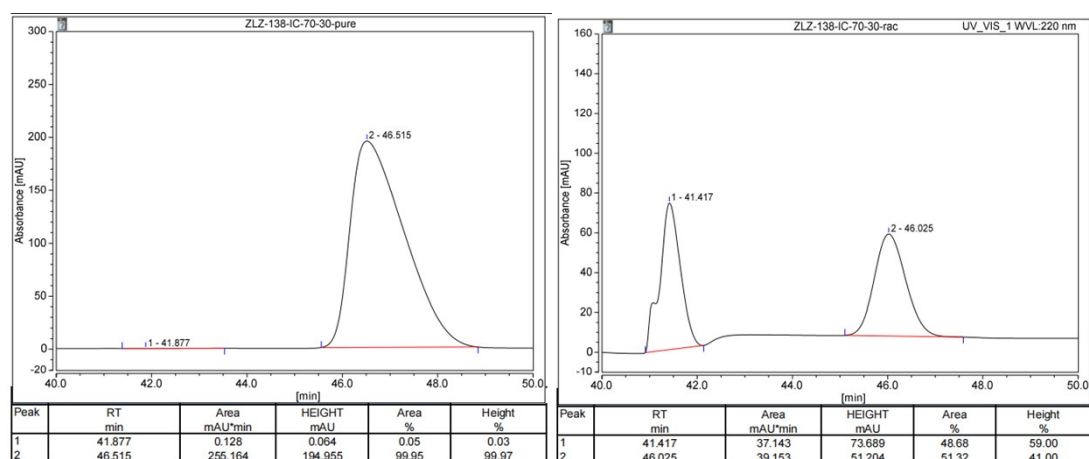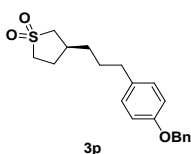

**3p**

The title compound was synthesized according to general procedure A, the product **3p** was purified by



flash column chromatography (PE: EA = 3:1) as a white solid (74% yield) with 89% *ee*. m.p. 60-62 °C.

**<sup>1</sup>H NMR** (500 MHz, CDCl<sub>3</sub>) δ 7.50-7.44 (m, 2H), 7.44-7.38 (m, 2H), 7.36 (d, *J* = 7.2 Hz, 1H), 7.10 (d, *J* = 8.6 Hz, 2H), 6.94 (d, *J* = 8.6 Hz, 2H), 5.07 (s, 2H), 3.27-3.18 (m, 2H), 3.07-3.00 (m, 1H), 2.70-2.56 (m, 3H), 2.45-2.40 (m, 1H), 2.38-2.28 (m, 1H), 1.84-1.77 (m, 1H), 1.68-1.62 (m, 2H), 1.56-1.50 (m, 2H). **<sup>13</sup>C NMR** (126 MHz, CDCl<sub>3</sub>) δ 157.2, 137.2, 133.9, 129.3, 128.6, 128.0, 127.5, 114.9, 70.1, 57.0, 52.4, 36.8, 34.7, 34.0, 29.3, 29.1.

**HRMS (ESI)**: Calculated for (C<sub>20</sub>H<sub>24</sub>NaO<sub>3</sub>S<sup>+</sup>) [M+Na]<sup>+</sup>: 367.1338 found 367.1347.

[α]<sub>D</sub><sup>25</sup> = -25.4° (c = 1.0, CHCl<sub>3</sub>).

**HPLC** (UltiMate 3000): Daicel Chiralpak IG-3 Column (*n*-Hexane/*i*-PrOH = 90 : 10, 1.0 mL/min), 30 °C, 220 nm, *R*<sub>t</sub> = 25.257 min (minor) and 27.995 min (major).

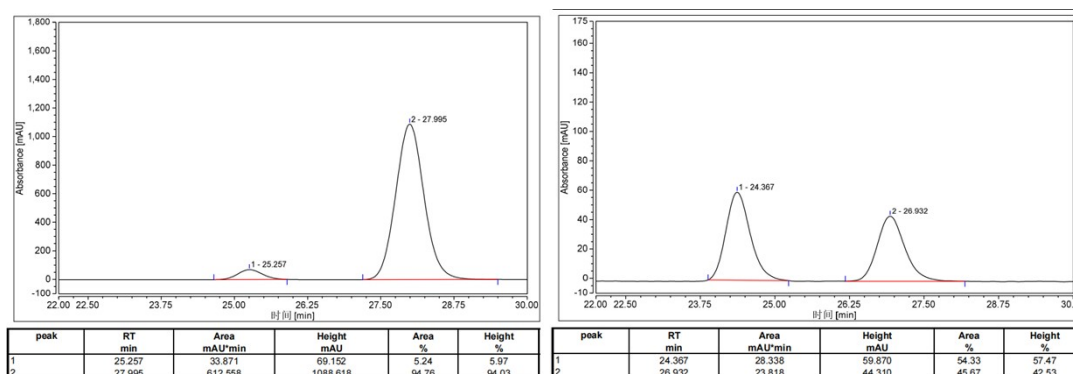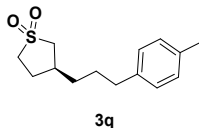

The title compound was synthesized according to general procedure A, the product **3q** was purified by flash column chromatography (PE: EA = 3:1) as a yellow oil (65% yield) with 97% *ee*.

**<sup>1</sup>H NMR** (500 MHz, CDCl<sub>3</sub>) δ 7.10 (d, *J* = 7.7 Hz, 2H), 7.04 (d, *J* = 8.0 Hz, 2H), 3.25 – 3.15 (m, 2H), 3.04 – 2.98 (m, 1H), 2.65 – 2.56 (m, 3H), 2.45 – 2.36 (m, 1H), 2.32 (s, 3H), 1.83 – 1.73 (m, 1H), 1.69 – 1.58 (m, 3H), 1.54 – 1.49 (m, 2H). **<sup>13</sup>C NMR** (126 MHz, CDCl<sub>3</sub>) δ 138.4, 135.5, 129.1, 128.2, 57.0, 52.4, 36.8, 35.2, 34.1, 29.2, 29.1, 21.0.

**HRMS (ESI)**: Calculated for (C<sub>14</sub>H<sub>20</sub>NaO<sub>2</sub>S<sup>+</sup>) [M+Na]<sup>+</sup>: 275.1076, found 275.1083.

[α]<sub>D</sub><sup>25</sup> = -3.3° (c = 1.0, CHCl<sub>3</sub>).

**HPLC** (UltiMate 3000): Daicel Chiralpak IB-3 Column (*n*-Hexane/*i*-PrOH = 90 : 10, 1.0 mL/min), 30 °C, 220 nm, *R*<sub>t</sub> = 7.707 min (minor) and 8.855 min (major).

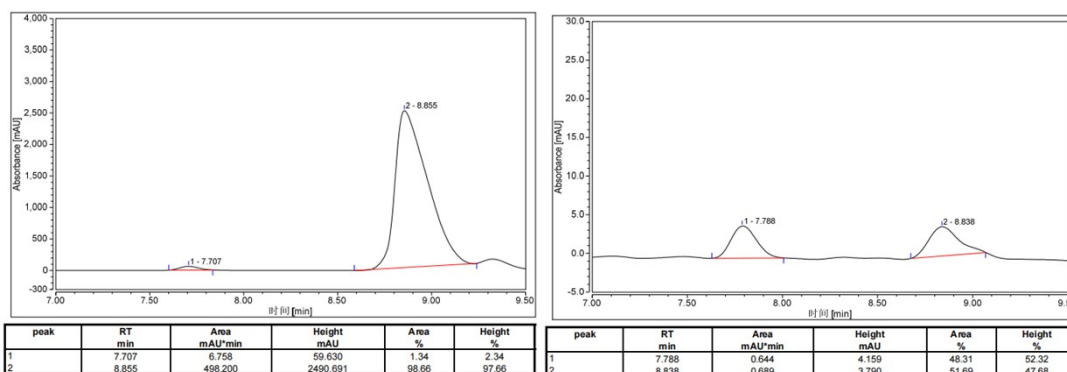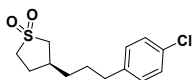

3r

The title compound was synthesized according to general procedure A, the product **3r** was purified by flash column chromatography (PE: EA = 3:1) as a colorless oil (46% yield) with 91% *ee*.

$^1\text{H NMR}$  (500 MHz,  $\text{CDCl}_3$ )  $\delta$  7.25 (d,  $J = 8.4$  Hz, 2H), 7.08 (d,  $J = 8.3$  Hz, 2H), 3.24 – 3.16 (m, 2H), 3.05 – 2.99 (m, 1H), 2.66 – 2.58 (m, 3H), 2.46 – 2.37 (m, 1H), 2.35 – 2.28 (m, 1H), 1.84 – 1.75 (m, 1H), 1.68 – 1.59 (m, 2H), 1.53 – 1.48 (m, 2H).  $^{13}\text{C NMR}$  (126 MHz,  $\text{CDCl}_3$ )  $\delta$  139.9, 131.8, 129.7, 128.6, 56.9, 52.3, 36.7, 34.9, 33.9, 29.1, 29.0.

**HRMS (ESI)**: Calculated for  $(\text{C}_{13}\text{H}_{18}\text{ClO}_2\text{S}^+)$   $[\text{M}+\text{H}]^+$ : 273.0711, found 273.0706.

$[\alpha]_D^{25} = -5.5^\circ$  ( $c = 1.0$ ,  $\text{CHCl}_3$ ).

**HPLC** (UltiMate 3000): Daicel Chiralpak AD-H Column (*n*-Hexane/*i*-PrOH = 80 : 20, 1.0 mL/min), 30 °C, 220 nm,  $R_t = 8.843$  min (minor) and 9.623 min (major).

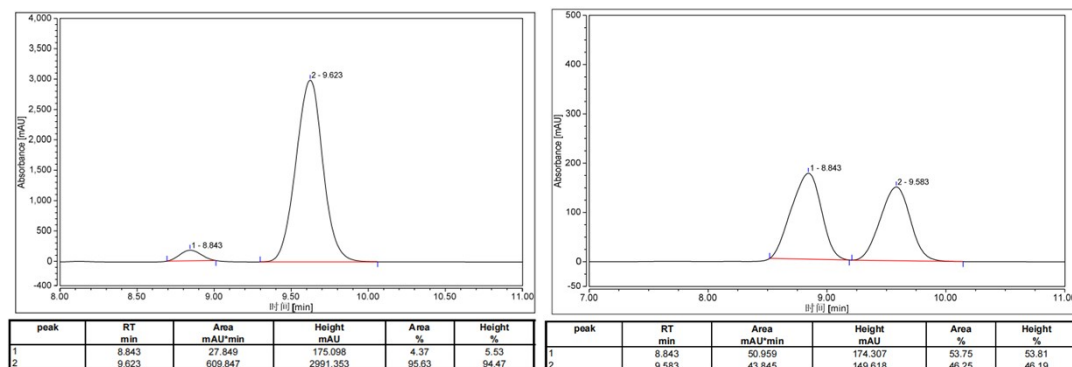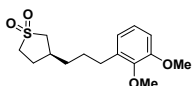

3s

The title compound was synthesized according to general procedure A, the product **3s** was purified by flash column chromatography (PE: EA = 3:1) as a yellow oil (60% yield) with 89% *ee*.

$^1\text{H NMR}$  (500 MHz,  $\text{CDCl}_3$ )  $\delta$  7.91 – 7.77 (m, 2H), 7.76 – 7.64 (m, 2H), 7.58 – 7.45 (m, 2H), 7.44 – 7.31 (m, 3H), 3.89 – 3.69 (m, 2H), 3.66 (t,  $J = 7.1$  Hz, 1H), 3.63 – 3.39 (m, 2H), 3.23 – 3.00 (m, 1H), 2.32 – 2.02 (m,

2H), 1.80 – 1.38 (m, 5H). <sup>13</sup>C NMR (126 MHz, CDCl<sub>3</sub>) δ 169.6, 168.4, 137.0, 134.0, 132.1, 132.0, 129.8, 128.3, 128.2, 127.1, 123.2, 55.0, 51.7, 49.3, 45.9, 39.4, 37.8, 37.4, 32.3, 30.4, 29.9, 29.7, 27.3, 27.2.

**HRMS (ESI):** Calculated for (C<sub>15</sub>H<sub>22</sub>NaO<sub>4</sub>S<sup>+</sup>) [M+Na]<sup>+</sup>: 321.1131, found 321.1136.

[α]<sub>D</sub><sup>25</sup> = -10.5° (c = 1.0, CHCl<sub>3</sub>).

**HPLC (UltiMate 3000):** Daicel Chiralpak AD-H Column (*n*-Hexane/*i*-PrOH = 90 : 10, 1.0 mL/min), 30 °C, 220 nm, R<sub>t</sub> = 14.770 min (minor) and 15.712 min (major).

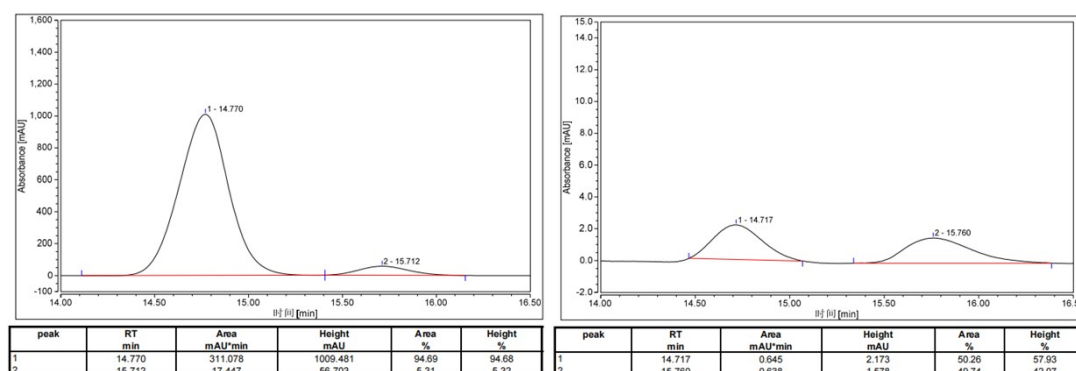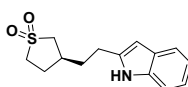

**3t**

The title compound was synthesized according to general procedure A, the product **3t** was purified by flash column chromatography (PE: EA = 5:1) as a yellow oil (57% yield) with 93% *ee*.

<sup>1</sup>H NMR (500 MHz, CDCl<sub>3</sub>) δ 8.05 (s, 1H), 7.55 (d, *J* = 7.9 Hz, 1H), 7.36 (d, *J* = 8.1 Hz, 1H), 7.23 – 7.17 (m, 1H), 7.15 – 7.09 (m, 1H), 6.96 (d, *J* = 2.2 Hz, 1H), 3.24 (dd, *J* = 13.8, 6.8 Hz, 1H), 3.21 – 3.14 (m, 1H), 3.02 – 2.95 (m, 1H), 2.81 (t, *J* = 7.5 Hz, 2H), 2.72 – 2.64 (m, 1H), 2.50 – 2.40 (m, 1H), 2.33 (dt, *J* = 13.1, 7.1 Hz, 1H), 1.98 – 1.82 (m, 3H). <sup>13</sup>C NMR (126 MHz, CDCl<sub>3</sub>) δ 136.5, 127.1, 122.2, 121.4, 119.4, 118.6, 114.9, 111.4, 56.9, 52.3, 36.4, 34.9, 29.2, 23.1.

**HRMS (ESI):** Calculated for (C<sub>14</sub>H<sub>18</sub>NO<sub>2</sub>S<sup>+</sup>) [M+H]<sup>+</sup>: 264.1053, found 264.1057.

[α]<sub>D</sub><sup>25</sup> = -8.1° (c = 1.0, CHCl<sub>3</sub>).

**HPLC (UltiMate 3000):** Daicel Chiralpak IC Column (*n*-Hexane/*i*-PrOH = 30: 70, 1.0 mL/min), 30 °C, 220 nm, R<sub>t</sub> = 11.957 min (minor) and 13.122 min (major).

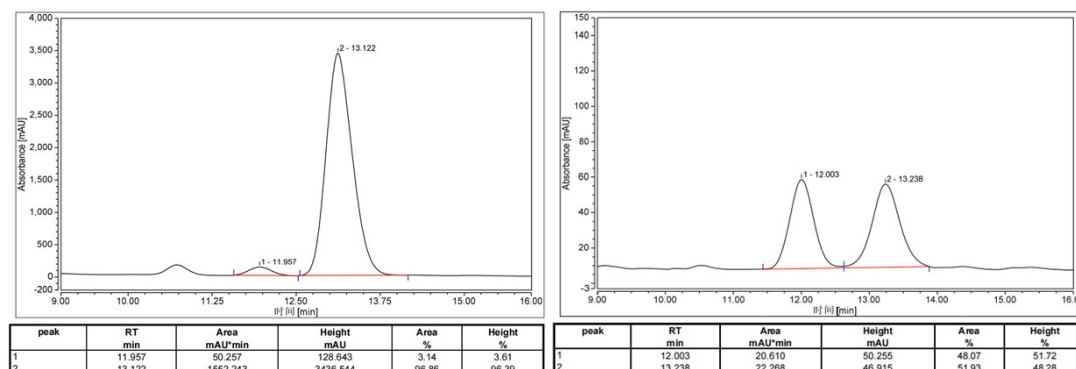

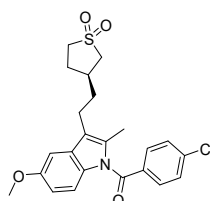

**3u**

The title compound was synthesized according to general procedure A, the product **3u** was purified by flash column chromatography (PE: EA = 2:1) as a brown oil (72% yield) with 92% *ee*.

**<sup>1</sup>H NMR** (500 MHz, CDCl<sub>3</sub>) δ 7.64 (d, *J* = 8.4 Hz, 2H), 7.47 (d, *J* = 8.5 Hz, 2H), 6.90 – 6.83 (m, 2H), 6.67 (dd, *J* = 9.0, 2.5 Hz, 1H), 3.84 (s, 3H), 3.29 (dd, *J* = 13.7, 6.8 Hz, 1H), 3.21 (dd, *J* = 16.2, 8.1 Hz, 1H), 3.04 (d, *J* = 7.8 Hz, 1H), 2.77 – 2.65 (m, 3H), 2.53 – 2.45 (m, 1H), 2.41 (dd, *J* = 17.6, 7.1 Hz, 1H), 2.34 (s, 3H), 1.93 – 1.81 (m, 3H). **<sup>13</sup>C NMR** (126 MHz, CDCl<sub>3</sub>) δ 168.3, 156.0, 139.2, 134.2, 134.0, 131.1, 131.0, 130.6, 129.2, 118.3, 115.1, 111.0, 101.4, 56.8, 55.8, 52.1, 36.5, 34.5, 29.2, 22.0, 13.3.

**HRMS (ESI)**: Calculated for (C<sub>23</sub>H<sub>25</sub>ClNO<sub>4</sub>S<sup>+</sup>) [M+H]<sup>+</sup>: 446.1187, found 446.1189.

[α]<sub>D</sub><sup>25</sup> = -14.7° (c = 1.0, CHCl<sub>3</sub>).

**HPLC (UltiMate 3000)**: Daicel Chiralpak IA Column (*n*-Hexane/*i*-PrOH = 70 : 30, 1.0 mL/min), 30 °C, 220 nm, *R*<sub>t</sub> = 16.173 min (major) and 18.232 min (minor).

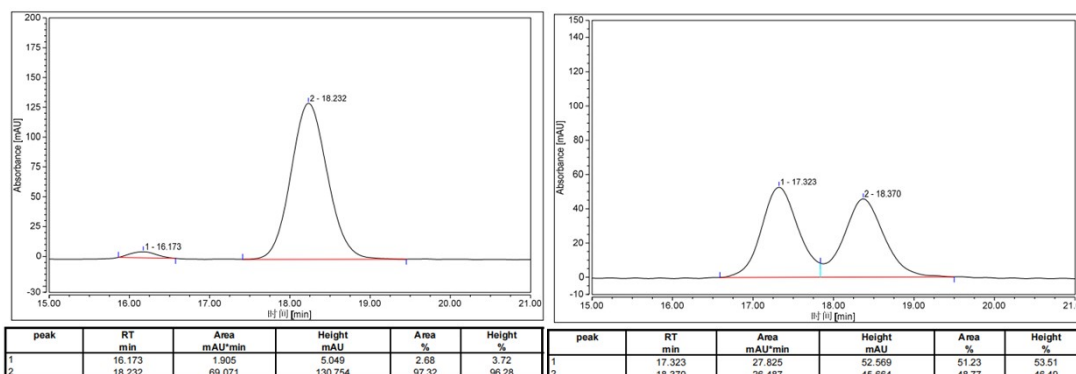

## General procedures for cobalt-catalyzed enantioselective hydroalkylation of 2,5-Dihydrofuran

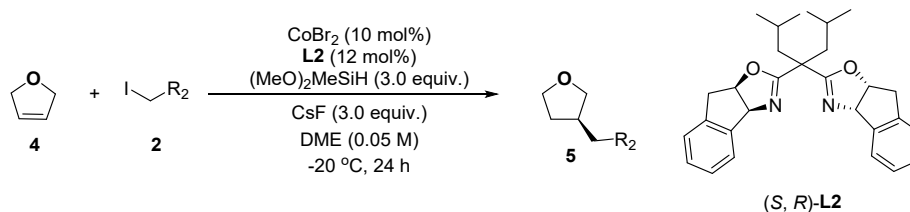

To an oven-dried 10 mL Schlenk tube containing a stirring bar was charged with  $\text{CoBr}_2$  (4.4 mg, 0.02 mmol, 10 mol%), (S, R)-L2 (10.7 mg, 0.024 mmol, 12 mol%) and 2.0 mL dry 1,2-dimethoxyethane in a nitrogen-filled glovebox, the mixture was stirred for 10 min at room temperature. Then 2,5-Dihydrofuran (0.2 mmol, 1.0 equiv.), alkyl iodides (0.4 mmol, 2.0 equiv.), CsF (91.1 mg, 0.6 mmol, 3.0 equiv.) and another 2.0 mL dry 1,2-dimethoxyethane were added sequentially. The tube was sealed and removed from the glove box,  $(\text{MeO})_2\text{MeSiH}$  (63.7 mg, 0.6 mmol, 3.0 equiv.) was added dropwise at  $-20^\circ\text{C}$  and the reaction was stirred at  $-20^\circ\text{C}$  for 24 h. After the reaction was completed, the reaction mixture was diluted with saturated  $\text{NH}_4\text{Cl}$  (aq., 2.0 mL) and EtOAc (5 mL). The aqueous phase was extracted with EtOAc ( $2 \times 5$  mL). The organic phase was dried over  $\text{Na}_2\text{SO}_4$ , filtered, and the solvent removed in vacuo. The crude mixture was purified by flash column chromatography on silica gel using a mixture of Hexane/EtOAc as eluent to obtain the desired product.

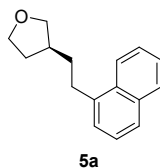

The title compound was synthesized according to general procedure A, the product **5a** was purified by flash column chromatography (PE: EA = 20:1) as a colorless oil (79% yield) with 96% *ee*.

**$^1\text{H NMR}$**  (500 MHz,  $\text{CDCl}_3$ )  $\delta$  7.98 (d,  $J = 8.3$  Hz, 1H), 7.81 (d,  $J = 1.6$  Hz, 1H), 7.68 (d,  $J = 8.2$  Hz, 1H), 7.52 – 7.40 (m, 2H), 7.36 (t,  $J = 7.6$  Hz, 1H), 7.27 (d,  $J = 7.0$  Hz, 1H), 3.93 (t,  $J = 7.8$  Hz, 1H), 3.88 – 3.79 (m, 1H), 3.73 (q,  $J = 7.8$  Hz, 1H), 3.39 (t,  $J = 7.8$  Hz, 1H), 3.12 – 2.96 (m, 2H), 2.28 – 2.22 (m,  $J = 7.4$  Hz, 1H), 2.11 – 1.98 (m, 1H), 1.85 – 1.72 (m, 2H), 1.60 – 1.47 (m, 1H)  **$^{13}\text{C NMR}$**  (126 MHz,  $\text{CDCl}_3$ )  $\delta$  138.2, 134.0, 131.8, 128.9, 126.8, 126.0, 125.9, 125.6, 125.6, 123.7, 73.4, 68.0, 39.4, 34.6, 32.6, 32.1

**HRMS (ESI)**: Calculated for  $(\text{C}_{16}\text{H}_{18}\text{NaO}^+)$   $[\text{M}+\text{Na}]^+$ : 249.1250, found 249.1242.

$[\alpha]_D^{25} = -12.4^\circ$  ( $c = 1.0$ ,  $\text{CHCl}_3$ ).

**HPLC** (UltiMate 3000): Daicel Chiralpak IH-3 Column (*n*-Hexane/*i*-PrOH = 70 : 30, 1.0 mL/min),  $30^\circ\text{C}$ , 220 nm,  $R_t = 5.792$  min (major) and 6.473 min (minor).

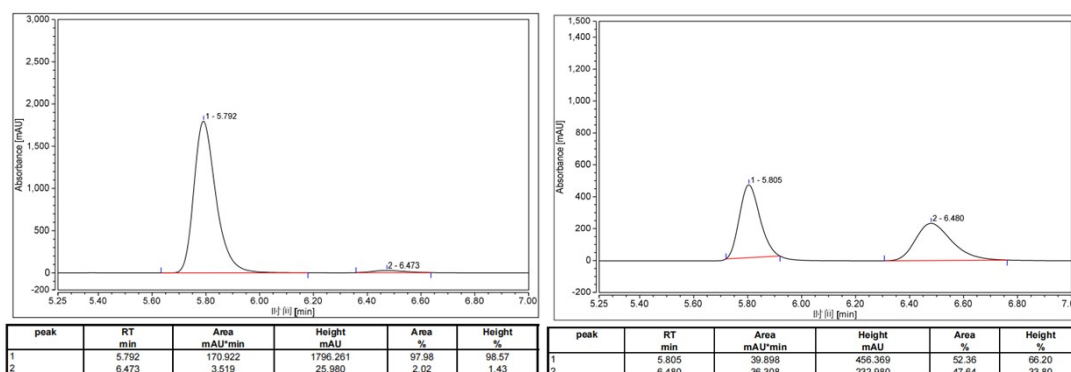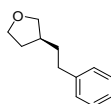

**5b**

The title compound was synthesized according to general procedure A, the product **5b** was purified by flash column chromatography (PE: EA = 20:1) as a colorless oil (65% yield) with 89% *ee*.

<sup>1</sup>H NMR (500 MHz, CDCl<sub>3</sub>) δ 7.28 (t, *J* = 7.5 Hz, 2H), 7.21 – 7.13 (m, 3H), 3.91 (t, *J* = 7.8 Hz, 1H), 3.85 (td, *J* = 8.3, 4.6 Hz, 1H), 3.74 (q, *J* = 7.8 Hz, 1H), 3.37 (t, *J* = 7.8 Hz, 1H), 2.63 (q, *J* = 7.7 Hz, 2H), 2.19 (p, *J* = 7.4 Hz, 1H), 2.05 (d, *J* = 7.5 Hz, 1H), 1.74 – 1.69 (m, 2H), 1.57 – 1.51 (m, 1H). <sup>13</sup>C NMR (126 MHz, CDCl<sub>3</sub>) δ 142.1, 128.4, 128.3, 125.9, 73.3, 68.0, 38.9, 35.2, 34.9, 32.5.

**HRMS (ESI)**: Calculated for (C<sub>12</sub>H<sub>17</sub>O<sup>+</sup>) [M+H]<sup>+</sup>: 177.1247, found 177.1297.

[α]<sub>D</sub><sup>25</sup> = -2.8° (c = 1.0, CHCl<sub>3</sub>).

**HPLC (UltiMate 3000)**: Daicel Chiralpak IE Column (*n*-Hexane/*i*-PrOH = 90 : 10, 0.8 mL/min), 30 °C, 220 nm, *R*<sub>t</sub> = 6.768 min (minor) and 7.076 min (major).

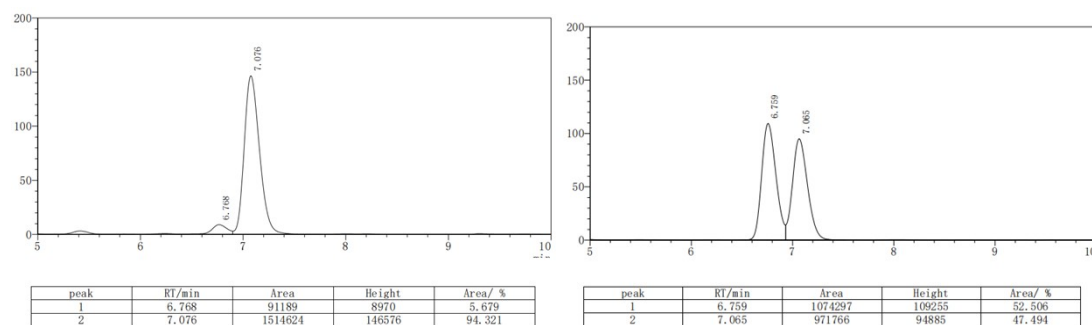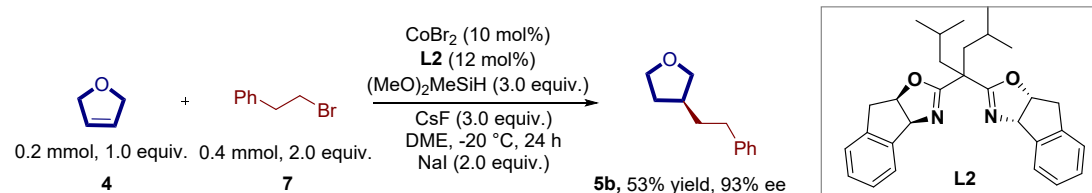

Alkyl bromide was used as the coupling partner under standard conditions, yielding the corresponding chiral furan compound **5b** with 53% yield and 93% *ee*. The addition of an equal amount of sodium iodide as an additive facilitated the reaction.

**<sup>1</sup>H NMR** (500 MHz, CDCl<sub>3</sub>) δ 7.29 – 7.23 (m, 2H), 7.20 – 7.11 (m, 3H), 3.91 – 3.88 (m, 1H), 3.84 (t, *J* = 8.3 Hz, 1H), 3.75 – 3.71 (m, 1H), 3.36 (t, *J* = 7.8 Hz, 1H), 2.60 (dd, *J* = 14.9, 7.3 Hz, 2H), 2.22 – 2.16 (m, 1H), 2.07 – 2.01 (m, 1H), 1.73 – 1.68 (m, 2H), 1.58 – 1.49 (m, 1H). **<sup>13</sup>C NMR** (126 MHz, CDCl<sub>3</sub>) δ 142.1, 128.4, 128.4, 125.9, 73.3, 68.0, 38.9, 35.2, 34.9, 32.5.

**HRMS (ESI)**: Calculated for (C<sub>12</sub>H<sub>17</sub>O<sup>+</sup>) [M+H]<sup>+</sup>: 177.1247, found 177.1295.

[α]<sub>D</sub><sup>25</sup> = -2.7° (c = 1.0, CHCl<sub>3</sub>).

**HPLC** (UltiMate 3000): Daicel Chiralcel OD-H Column (*n*-Hexane/*i*-PrOH = 90 : 10, 0.8 mL/min), 30 °C, 220 nm, R<sub>t</sub> = 5.986 min (minor) and 6.444 min (major).

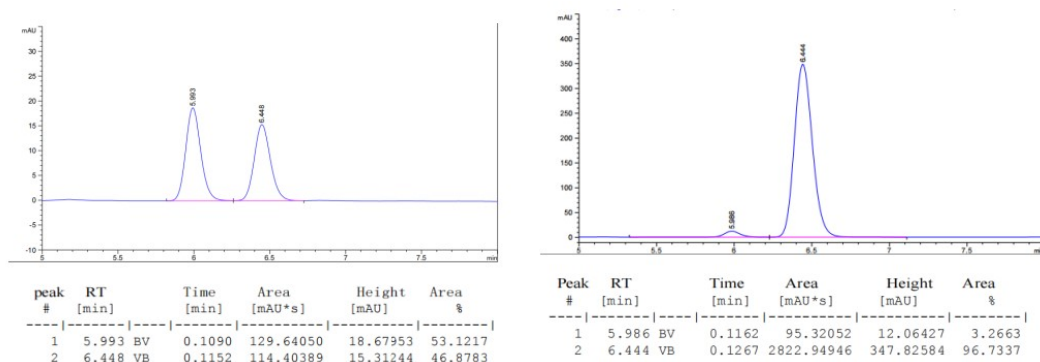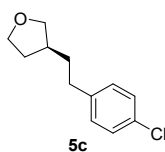

The title compound was synthesized according to general procedure A, the product **5c** was purified by flash column chromatography (PE: EA = 20:1) as a colorless oil (56% yield) with 96% *ee*.

**<sup>1</sup>H NMR** (500 MHz, CDCl<sub>3</sub>) δ 7.24 (d, *J* = 8.4 Hz, 2H), 7.10 (d, *J* = 8.4 Hz, 2H), 3.92 – 3.82 (m, 2H), 3.77 – 3.70 (m, 1H), 3.38 – 3.33 (m, 1H), 2.65 – 2.55 (m, 2H), 2.21 – 2.14 (m, 1H), 2.07 (d, *J* = 7.4 Hz, 1H), 1.73 – 1.65 (m, 2H), 1.57 – 1.48 (m, 1H). **<sup>13</sup>C NMR** (126 MHz, CDCl<sub>3</sub>) δ 140.5, 131.6, 129.7, 128.5, 73.3, 67.9, 38.8, 35.1, 34.2, 32.4.

**HRMS (ESI)**: Calculated for (C<sub>12</sub>H<sub>16</sub>ClO<sup>+</sup>) [M+H]<sup>+</sup>: 211.0884, found 211.0948.

[α]<sub>D</sub><sup>25</sup> = -6.4° (c = 1.0, CHCl<sub>3</sub>).

**HPLC** (UltiMate 3000): Daicel Chiralcel OD-H Column (*n*-Hexane/*i*-PrOH = 90 : 10, 0.5 mL/min), 30 °C, 220 nm, R<sub>t</sub> = 11.252 min (minor) and 11.932 min (major).

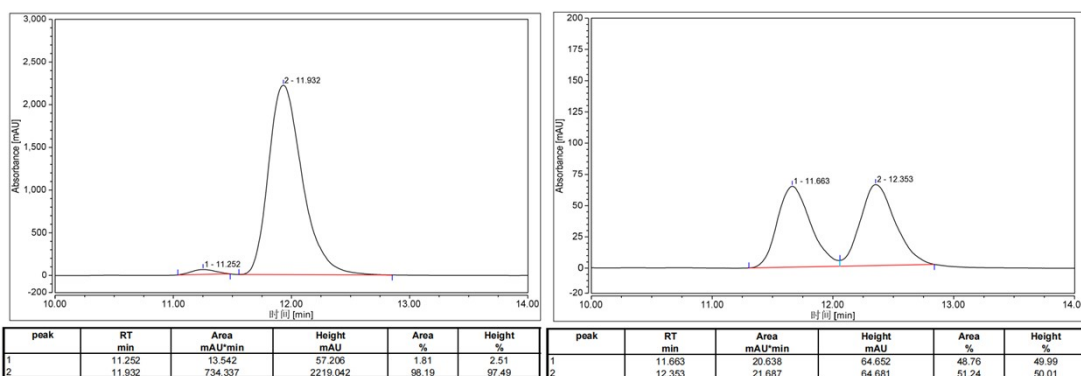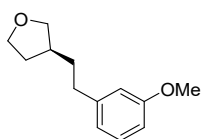

**5d**

The title compound was synthesized according to general procedure A, the product **5d** was purified by flash column chromatography (PE: EA = 20:1) as a colorless oil (75% yield) with 99% *ee*.

<sup>1</sup>H NMR (500 MHz, CDCl<sub>3</sub>) δ 7.21 – 7.18 (m, 1H), 6.80 – 6.69 (m, 3H), 3.93 – 3.89 (m, 1H), 3.86 (dd, *J* = 8.0, 3.4 Hz, 1H), 3.80 (s, 3H), 3.74 (q, *J* = 7.8 Hz, 1H), 3.40 – 3.34 (m, 1H), 2.61 (d, *J* = 8.1 Hz, 2H), 2.23 – 2.17 (m, 1H), 2.10 – 2.02 (m, 1H), 1.71 (t, *J* = 9.1 Hz, 2H). <sup>13</sup>C NMR (126 MHz, CDCl<sub>3</sub>) δ 159.7, 143.7, 129.4, 120.8, 114.2, 111.1, 73.3, 67.9, 55.1, 38.9, 35.0, 34.9, 32.5.

**HRMS (ESI)**: Calculated for (C<sub>13</sub>H<sub>19</sub>O<sub>2</sub>)<sup>+</sup> [M+H]<sup>+</sup>: 207.1380, found 207.1390.

[α]<sub>D</sub><sup>25</sup> = -4.7° (c = 1.0, CHCl<sub>3</sub>).

**HPLC** (UltiMate 3000): Daicel Chiralpak IH-3 Column (*n*-Hexane/*i*-PrOH = 90 : 10, 1.0 mL/min), 30 °C, 220 nm, *R*<sub>t</sub> = 6.440 min (minor) and 6.607 min (major).

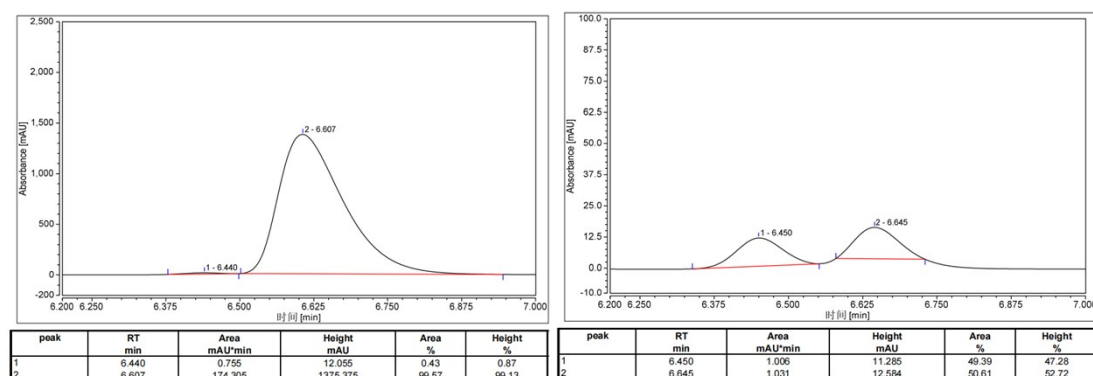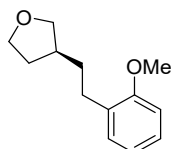

**5e**



The title compound was synthesized according to general procedure A, the product **5e** was purified by flash column chromatography (PE: EA = 20:1) as a yellow oil (81% yield) with 93% *ee*.

<sup>1</sup>H NMR (500 MHz, CDCl<sub>3</sub>) δ 7.21 – 7.14 (m, 1H), 7.12 (d, *J* = 7.3 Hz, 1H), 6.92 – 6.80 (m, 2H), 3.95 – 3.90 (m, 1H), 3.88 – 3.83 (m, 1H), 3.82 (s, 3H), 3.77 – 3.71 (m, 1H), 3.41 – 3.36 (m, 1H), 2.69 – 2.55 (m, 2H), 2.20 (dt, *J* = 14.8, 7.4 Hz, 1H), 2.10 – 2.03 (m, 1H), 1.72 – 1.63 (m, 2H), 1.57 – 1.51 (m, 1H). <sup>13</sup>C NMR (126 MHz, CDCl<sub>3</sub>) δ 157.4, 130.5, 129.7, 127.1, 120.4, 110.2, 73.5, 68.0, 55.2, 39.2, 33.7, 32.6, 29.2.

**HRMS (ESI)**: Calculated for (C<sub>13</sub>H<sub>18</sub>NaO<sub>2</sub><sup>+</sup>) [M+Na]<sup>+</sup>: 229.1199, found 229.1208.

[α]<sub>D</sub><sup>25</sup> = -1.5° (c = 1.0, CHCl<sub>3</sub>).

**HPLC (UltiMate 3000)**: Daicel Chiralcel OD Column (*n*-Hexane/*i*-PrOH = 90 : 10, 1.0 mL/min), 30 °C, 220 nm, *R*<sub>t</sub> = 5.230 min (minor) and 5.847 min (major).

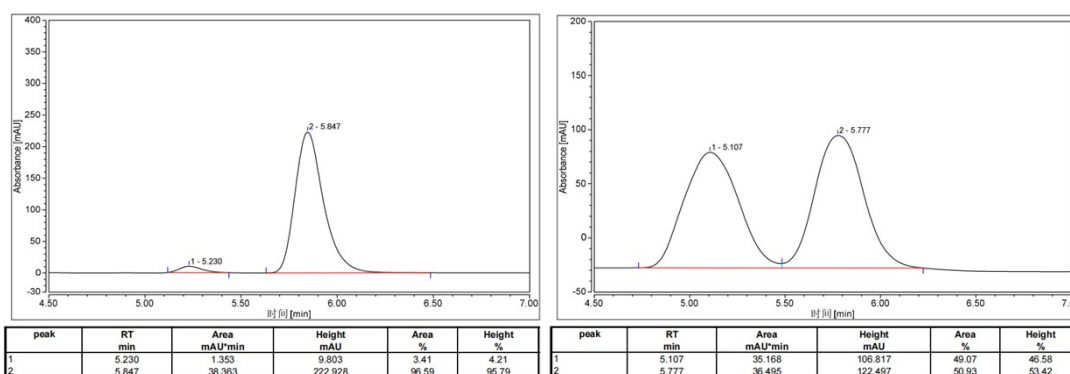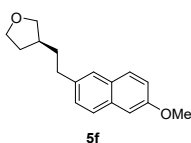

The title compound was synthesized according to general procedure A, the product **5f** was purified by flash column chromatography (PE: EA = 20:1) as a white solid (55% yield) with 93% *ee*. m.p. 47-49 °C.

<sup>1</sup>H NMR (500 MHz, CDCl<sub>3</sub>) δ 7.67 (d, *J* = 8.4 Hz, 2H), 7.53 (s, 1H), 7.28 (d, *J* = 10.2 Hz, 1H), 7.14 – 7.08 (m, 2H), 3.93 (d, *J* = 7.3 Hz, 1H), 3.91 (s, 3H), 3.89 – 3.84 (m, 1H), 3.77 – 3.71 (m, 1H), 3.42 – 3.37 (m, 1H), 2.79 – 2.71 (m, 2H), 2.26 – 2.20 (m, 1H), 2.11 – 2.03 (m, 1H), 1.82 – 1.76 (m, 2H), 1.60 – 1.53 (m, 1H). <sup>13</sup>C NMR (126 MHz, CDCl<sub>3</sub>) δ 157.2, 137.2, 133.0, 129.1, 128.9, 127.7, 126.8, 126.2, 118.8, 105.7, 73.4, 68.0, 55.3, 38.9, 35.1, 34.8, 32.5.

**HRMS (ESI)**: Calculated for (C<sub>17</sub>H<sub>20</sub>NNaO<sub>2</sub><sup>+</sup>) [M+H]<sup>+</sup>: 279.1356, found 279.1360.

[α]<sub>D</sub><sup>25</sup> = -7.4° (c = 1.0, CHCl<sub>3</sub>).

**HPLC (UltiMate 3000)**: Daicel Chiralpak IC Column (*n*-Hexane/*i*-PrOH = 90:10, 1.0 mL/min), 30 °C, 220 nm, *R*<sub>t</sub> = 14.248 min (minor) and 16.548 min (major).

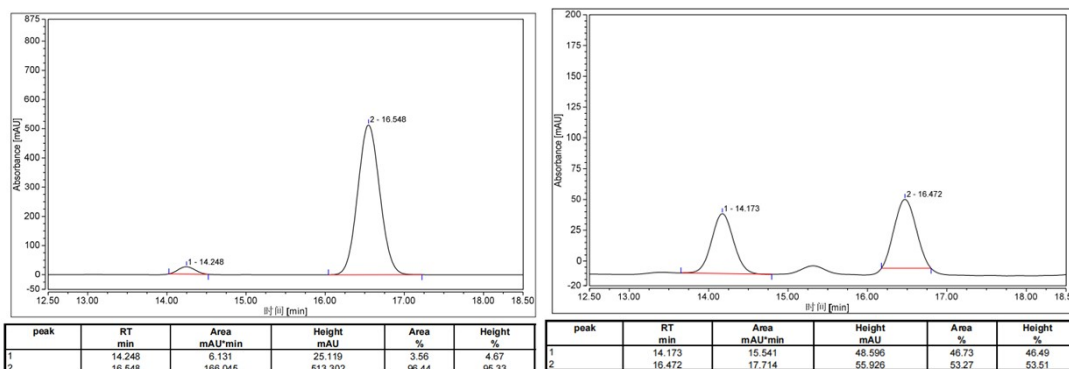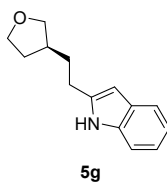

The title compound was synthesized according to general procedure A, the product **5g** was purified by flash column chromatography (PE: EA = 20:1) as a brown oil (67% yield) with 95% *ee*.

<sup>1</sup>H NMR (500 MHz, CDCl<sub>3</sub>) δ 7.95 (s, 1H), 7.59 (d, *J* = 8.8 Hz, 1H), 7.35 (d, *J* = 7.2 Hz, 1H), 7.22 – 7.16 (m, 1H), 7.14 – 7.09 (m, 1H), 6.97 (d, *J* = 3.3 Hz, 1H), 3.97 – 3.91 (m, 1H), 3.90 – 3.84 (m, 1H), 3.78 – 3.72 (m, 1H), 3.44 – 3.38 (m, 1H), 2.78 (q, *J* = 7.1 Hz, 2H), 2.30 – 2.25 (m, 1H), 2.13 – 2.05 (m, 1H), 1.83 (s, 2H), 1.58 (d, *J* = 8.3 Hz, 1H). <sup>13</sup>C NMR (126 MHz, CDCl<sub>3</sub>) δ 136.4, 127.4, 122.0, 121.1, 119.2, 118.9, 116.4, 111.1, 73.4, 68.0, 39.1, 33.9, 32.5, 24.2.

**HRMS (ESI):** Calculated for (C<sub>14</sub>H<sub>18</sub>NO<sup>+</sup>) [M+H]<sup>+</sup>: 216.1383, found 216.1384.

[α]<sub>D</sub><sup>25</sup> = -9.5° (c = 1.0, CHCl<sub>3</sub>).

**HPLC (UltiMate 3000):** Daicel Chiralpak IA-3 Column (*n*-Hexane/*i*-PrOH = 90:10, 1.0 mL/min), 30 °C, 220 nm, Rt = 11.518 min (minor) and 12.235 min (major).

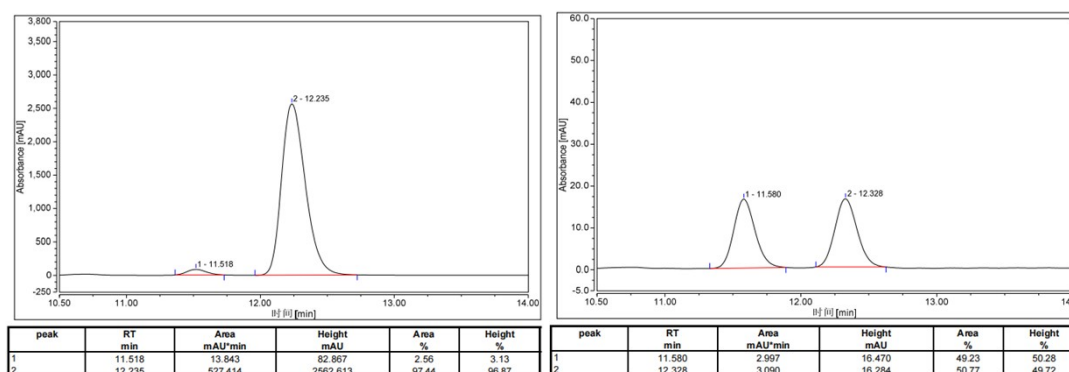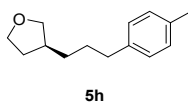

The title compound was synthesized according to general procedure A, the product **5h** was purified by flash column chromatography (PE: EA = 20:1) as a colorless oil (69% yield) with 96% *ee*.

**<sup>1</sup>H NMR** (500 MHz, CDCl<sub>3</sub>) δ 7.07 (q, *J* = 7.9 Hz, 4H), 3.89 (t, *J* = 7.8 Hz, 1H), 3.83 (td, *J* = 8.3, 4.6 Hz, 1H), 3.74 (t, *J* = 7.7 Hz, 1H), 3.30 (t, *J* = 7.8 Hz, 1H), 2.57 (t, *J* = 7.7 Hz, 2H), 2.31 (s, 3H), 2.21 – 2.13 (m, 1H), 2.05 – 1.98 (m, 1H), 1.65 – 1.56 (m, 2H), 1.47 (d, *J* = 7.9 Hz, 1H), 1.43 – 1.38 (m, 2H). **<sup>13</sup>C NMR** (126 MHz, CDCl<sub>3</sub>) δ 139.3, 135.2, 129.0, 128.3, 73.4, 68.0, 39.4, 35.6, 32.9, 32.5, 30.6, 21.0.

**HRMS (ESI)**: Calculated for (C<sub>14</sub>H<sub>21</sub>O<sup>+</sup>) [M+H]<sup>+</sup>: 227.1406, found 227.1411.

[α]<sub>D</sub><sup>25</sup> = -17.6° (c = 1.0, CHCl<sub>3</sub>).

**HPLC** (UltiMate 3000): Daicel Chiralcel OB-H Column (*n*-Hexane/*i*-PrOH = 90 : 10, 1.0 mL/min), 30 °C, 220 nm, Rt = 6.305 min (major) and 6.893 min (minor).

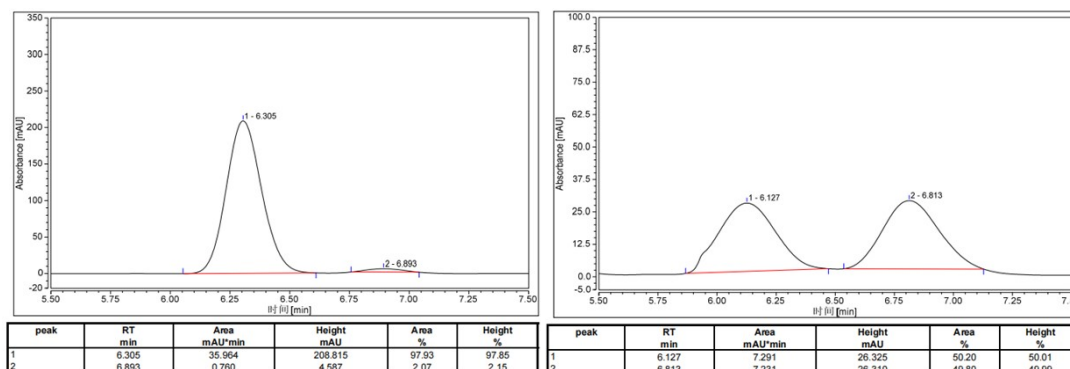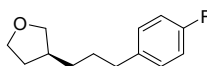

**5i**

The title compound was synthesized according to general procedure A, the product **5i** was purified by flash column chromatography (PE: EA = 20:1) as a colorless oil (57% yield) with 99% *ee*.

**<sup>1</sup>H NMR** (500 MHz, CDCl<sub>3</sub>) δ 7.12 – 7.09 (m, 2H), 7.00 – 6.89 (m, 2H), 3.89 (t, *J* = 7.8 Hz, 1H), 3.85 – 3.79 (m, 1H), 3.76 – 3.69 (m, 1H), 3.34 – 3.27 (m, 1H), 2.58 (t, *J* = 7.7 Hz, 2H), 2.21 – 2.13 (m, 1H), 2.06 – 1.98 (m, 1H), 1.65 – 1.56 (m, 2H), 1.51 – 1.45 (m, 1H), 1.43 – 1.36 (m, 2H). **<sup>13</sup>C NMR** (126 MHz, CDCl<sub>3</sub>) δ 161.2 (d, *J* = 243.2 Hz), 137.9 (d, *J* = 3.2 Hz), 129.6 (d, *J* = 7.8 Hz), 115.0 (d, *J* = 21.1 Hz), 73.4, 70.0, 39.3, 35.2, 32.8, 32.5, 30.5. **<sup>19</sup>F NMR** (471 MHz, CDCl<sub>3</sub>) δ -117.90.

**HRMS (ESI)**: Calculated for (C<sub>13</sub>H<sub>18</sub>FO<sup>+</sup>) [M+H]<sup>+</sup>: 209.1336, found 209.1338.

[α]<sub>D</sub><sup>25</sup> = -164.2° (c = 1.0, CHCl<sub>3</sub>).

**HPLC** (UltiMate 3000): Daicel Chiralpak IA-3 Column (*n*-Hexane/*i*-PrOH = 90 : 10, 1.0 mL/min), 30 °C, 220 nm, Rt = 4.440 min (minor) and 4.770 min (major).

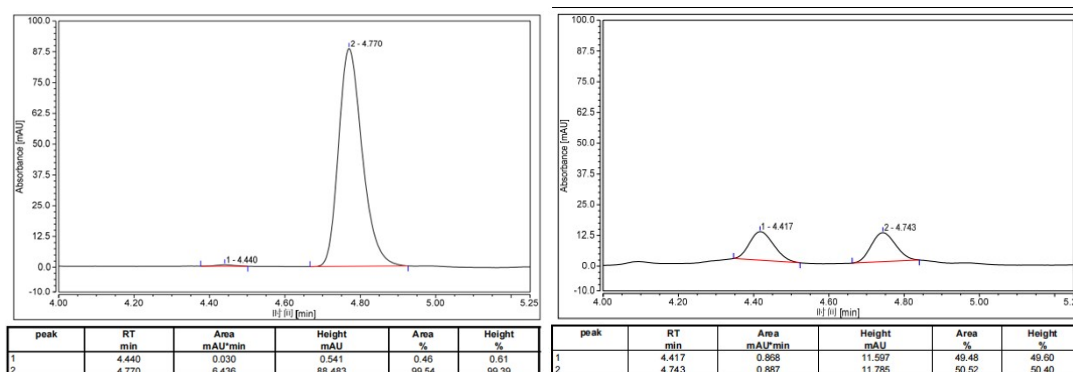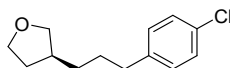

**5j**

The title compound was synthesized according to general procedure A, the product **5j** was purified by flash column chromatography (PE: EA = 20:1) as a colorless oil (63% yield) with 99% *ee*.

**<sup>1</sup>H NMR** (500 MHz, CDCl<sub>3</sub>) δ 7.24 (d, *J* = 8.4 Hz, 2H), 7.09 (d, *J* = 8.3 Hz, 2H), 3.91 – 3.86 (m, 1H), 3.86 – 3.80 (m, 1H), 3.74 (t, *J* = 8.1 Hz, 1H), 3.35 – 3.27 (m, 1H), 2.58 (t, *J* = 7.6 Hz, 2H), 2.20 – 2.14 (m, 1H), 2.06 – 1.98 (m, 1H), 1.67 – 1.55 (m, 3H), 1.48 (s, 1H), 1.43 – 1.36 (m, 2H). **<sup>13</sup>C NMR** (126 MHz, CDCl<sub>3</sub>) δ 140.7, 131.5, 129.7, 128.4, 73.4, 68.0, 39.3, 35.4, 32.8, 32.4, 30.3.

**HRMS (ESI)**: Calculated for (C<sub>13</sub>H<sub>17</sub>NaClO)<sup>+</sup> [M+Na]<sup>+</sup>: 247.0860, found 247.0771.

[α]<sub>D</sub><sup>25</sup> = -13.0° (c = 1.0, CHCl<sub>3</sub>).

**HPLC** (UltiMate 3000): Daicel Chiralpak IH-3 Column (*n*-Hexane/*i*-PrOH = 95 : 5, 1.0 mL/min), 30 °C, 220 nm, Rt = 4.160 min (minor) and 5.203 min (major).

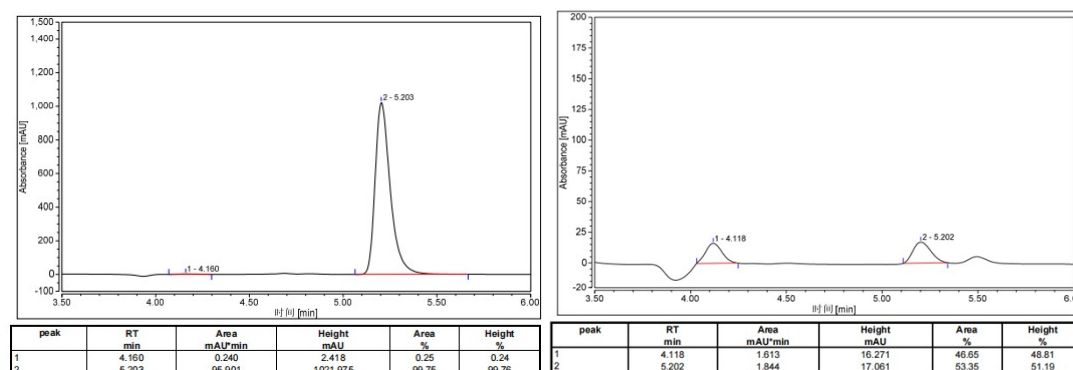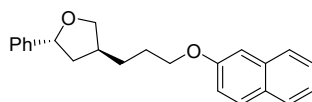

**5k**

To an oven-dried 10 mL Schlenk tube containing a stirring bar was charged with CoBr<sub>2</sub> (4.4 mg, 0.02 mmol, 10 mol%), (*S, R*)-**L2** (10.7 mg, 0.024 mmol, 12 mol%) and 2.0 mL dry 1,2-dimethoxyethane in a nitrogen-filled glovebox, the mixture was stirred for 10 min at room temperature. Then 2-phenyl-2,5-

dihydrofuran (0.6 mmol, 3.0 equiv.), alkyl iodides (0.2 mmol, 1.0 equiv.), CsF (91.1 mg, 0.6 mmol, 3.0 equiv.) and another 2.0 mL dry 1,2-dimethoxyethane were added sequentially. The tube was sealed and removed from the glove box, (MeO)<sub>2</sub>MeSiH (63.7 mg, 0.6 mmol, 3.0 equiv.) was added dropwise at -20°C and the reaction was stirred at -20 °C for 24 h. After the reaction was completed, the reaction mixture was diluted with saturated NH<sub>4</sub>Cl (aq., 2.0 mL) and EtOAc (5 mL). The aqueous phase was extracted with EtOAc (2 × 5 mL). The organic phase was dried over Na<sub>2</sub>SO<sub>4</sub>, filtered, and the solvent removed in vacuo. The crude mixture was purified by flash column chromatography on silica gel using a mixture of Hexane/EtOAc as eluent to obtain the desired product of **5k** as a colourless oil (51% yield) with 95% ee.

<sup>1</sup>H NMR (500 MHz, CDCl<sub>3</sub>) δ 7.79 – 7.69 (m, 3H), 7.43 (t, J = 7.6 Hz, 1H), 7.36 – 7.30 (m, 5H), 7.25 (d, J = 7.6 Hz, 1H), 7.13 – 7.11 (m, 2H), 5.04 (t, J = 6.8 Hz, 1H), 4.28 (t, J = 7.7 Hz, 1H), 4.08 (t, J = 6.3 Hz, 2H), 3.58 (t, J = 7.9 Hz, 1H), 2.44 – 2.38 (m, 1H), 2.06 (t, J = 7.1 Hz, 2H), 1.93 – 1.82 (m, 2H), 1.71 – 1.63 (m, 2H). <sup>13</sup>C NMR (126 MHz, CDCl<sub>3</sub>) δ 156.9, 143.8, 134.6, 129.4, 129.0, 128.3, 127.7, 127.1, 126.7, 126.4, 125.5, 123.6, 118.9, 106.6, 80.1, 74.2, 67.8, 40.7, 38.7, 29.8, 28.2.

**HRMS (ESI):** Calculated for (C<sub>23</sub>H<sub>24</sub>O<sub>2</sub>Na<sup>+</sup>) [M+Na]<sup>+</sup>: 355.1669, found 355.1672.

[α]<sub>D</sub><sup>25</sup> = 0.73° (c = 1.0, CHCl<sub>3</sub>).

**HPLC (UltiMate 3000):** Daicel Chiralcel OD-H Column (*n*-Hexane/*i*-PrOH = 90 : 10, 1.0 mL/min), 30 °C, 214 nm, Rt = 52.990 min (major) and 101.302 min (minor).

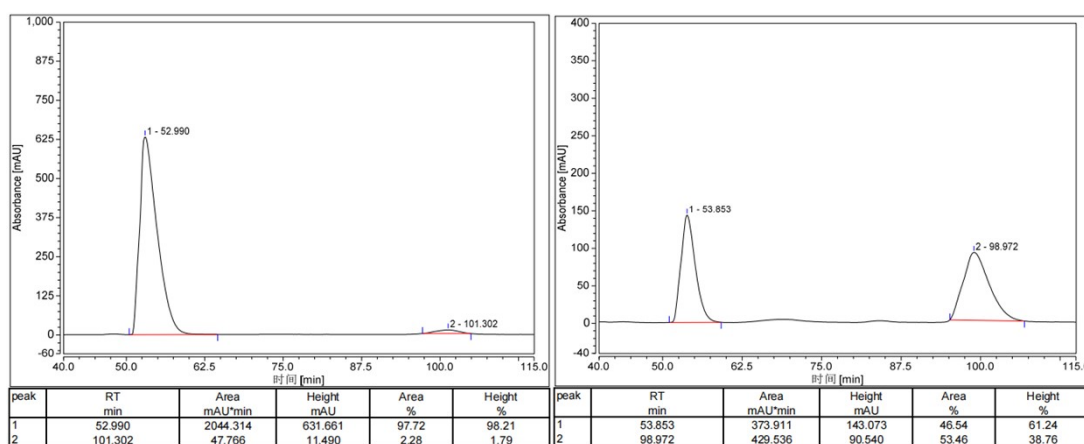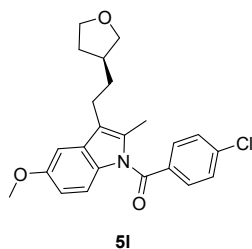

The title compound was synthesized according to general procedure A, the product **5l** was purified by flash column chromatography (PE: EA = 5:1) as a brown oil (80% yield) with 94% ee.

**<sup>1</sup>H NMR** (500 MHz, CDCl<sub>3</sub>) δ 7.33 – 7.24 (m, 2H), 7.23 – 7.11 (m, 3H), 3.81 – 3.62 (m, 1H), 3.60 – 3.50 (m, 1H), 3.40 – 3.28 (m, 1H), 3.06 – 2.94 (m, 1H), 2.72 – 2.59 (m, 2H), 2.25 – 2.03 (m, 5H), 1.74 – 1.69 (m, 2H), 1.66 – 1.46 (m, 1H), 0.96 (d, *J* = 6.4 Hz, 6H). **<sup>13</sup>C NMR** (126 MHz, CDCl<sub>3</sub>) δ 168.3, 155.9, 139.0, 134.3, 134.0, 131.1, 131.1, 131.1, 129.1, 119.5, 115.0, 110.8, 101.6, 73.4, 68.0, 55.8, 39.1, 33.5, 32.6, 23.0, 13.3.

**HRMS (ESI):** Calculated for (C<sub>23</sub>H<sub>25</sub>ClNO<sub>3</sub>)<sup>+</sup> [M+H]<sup>+</sup>: 398.1517, found 398.1522.

[α]<sub>D</sub><sup>25</sup> = -7.9° (c = 1.0, CHCl<sub>3</sub>).

**HPLC (UltiMate 3000):** Daicel Chiralpak IC Column (*n*-Hexane/*i*-PrOH = 70 : 30, 1.0 mL/min), 30 °C, 220 nm, *R*<sub>t</sub> = 16.173 min (major) and 18.232 min (minor).

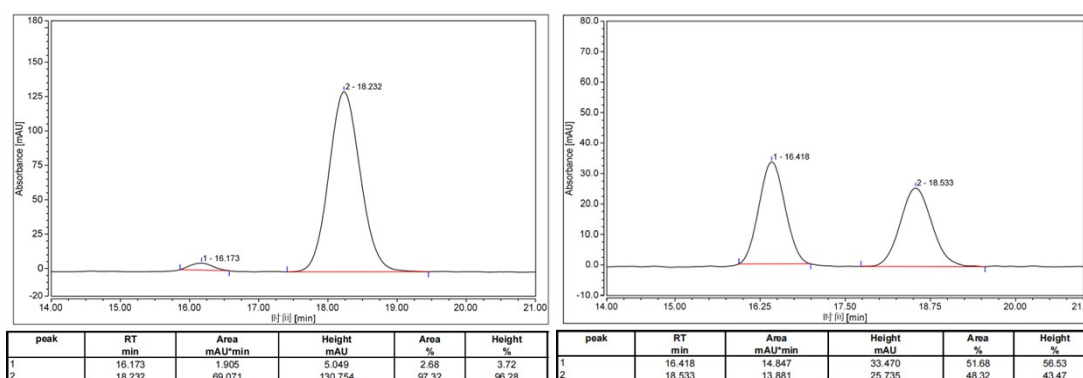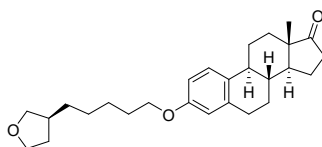

**5m**

The title compound was synthesized according to general procedure A, the product **5m** was purified by flash column chromatography (PE: EA = 5:1) as a white solid (47% yield) with 95% *ee*. m.p. 44-46 °C.

**<sup>1</sup>H NMR** (500 MHz, CDCl<sub>3</sub>) δ 7.19 (d, *J* = 8.6 Hz, 1H), 6.70 (dd, *J* = 8.5, 2.8 Hz, 1H), 6.63 (s, 1H), 3.92 (q, *J* = 6.9 Hz, 3H), 3.87 – 3.80 (m, 1H), 3.74 (q, *J* = 7.8 Hz, 1H), 3.32 (t, *J* = 7.8 Hz, 1H), 2.92 – 2.85 (m, 2H), 2.50 (dd, *J* = 19.0, 8.7 Hz, 1H), 2.39 (d, *J* = 14.3 Hz, 1H), 2.25 (d, *J* = 10.6 Hz, 1H), 2.19 – 2.11 (m, 2H), 2.07 – 1.98 (m, 3H), 1.95 (d, *J* = 15.0 Hz, 1H), 1.76 (s, 2H), 1.59 (dd, *J* = 33.2, 11.3 Hz, 3H), 1.52 – 1.44 (m, 6H), 1.43 – 1.35 (m, 4H), 0.90 (s, 3H). **<sup>13</sup>C NMR** (126 MHz, CDCl<sub>3</sub>) δ 221.0, 157.1, 137.7, 131.9, 126.3, 114.6, 112.1, 73.5, 68.0, 67.8, 50.4, 48.0, 44.0, 39.4, 38.4, 35.9, 33.3, 32.6, 31.6, 29.7, 29.3, 28.4, 26.6, 26.2, 26.0, 21.6, 13.9.

**HRMS (ESI):** Calculated for (C<sub>27</sub>H<sub>38</sub>NaO<sub>3</sub>)<sup>+</sup> [M+Na]<sup>+</sup>: 433.2713, found 433.2782.

[α]<sub>D</sub><sup>25</sup> = +131.1° (c = 1.0, CHCl<sub>3</sub>).

**HPLC (UltiMate 3000):** Daicel Chiralpak IE Column (*n*-Hexane/*i*-PrOH = 50 : 50, 1.0 mL/min), 30 °C, 220 nm, *R*<sub>t</sub> = 15.382 min (major) and 16.292 min (minor).

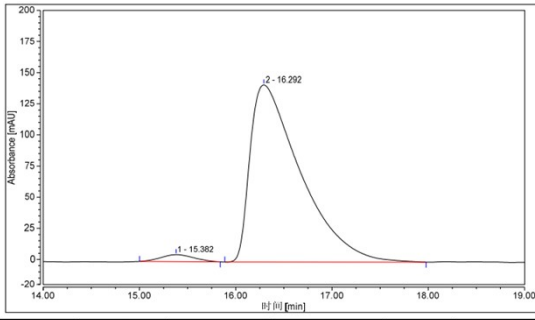

| peak | RT<br>min | Area<br>mAU*min | Height<br>mAU | Area<br>% | Height<br>% |
|------|-----------|-----------------|---------------|-----------|-------------|
| 1    | 15.382    | 2.197           | 5.563         | 2.48      | 3.76        |
| 2    | 16.292    | 89.551          | 142.201       | 97.52     | 96.24       |

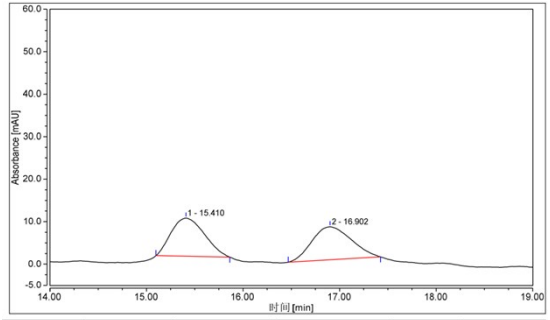

| peak | RT<br>min | Area<br>mAU*min | Height<br>mAU | Area<br>% | Height<br>% |
|------|-----------|-----------------|---------------|-----------|-------------|
| 1    | 15.410    | 3.589           | 8.973         | 49.51     | 53.60       |
| 2    | 16.902    | 3.659           | 7.767         | 50.49     | 46.40       |

## Transformations of products

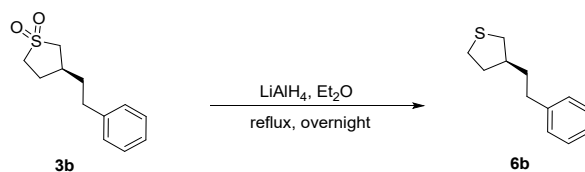

To the stirring suspension of  $\text{LiAlH}_4$  (68.3 mg, 1.8 mmol, 9.0 equiv.) and dry  $\text{Et}_2\text{O}$  (10 ml) was added **3b** (44.9 mg, 0.2 mmol, 1.0 equiv.) at  $0^\circ\text{C}$  under  $\text{N}_2$  atmosphere for reflux overnight. After the reaction was completed, the reaction was carefully quenched at  $0^\circ\text{C}$  and then extracted with  $\text{EtOAc}$  (3x20 mL). The merged organic layer is dried with  $\text{Na}_2\text{SO}_4$  and evaporated in vacuum.<sup>[1]</sup> The crude mixture was purified by flash column chromatography on silica gel to give desired **6b** in 74% as white solid. m.p.  $70\text{-}72^\circ\text{C}$ .

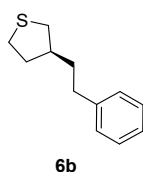

**$^1\text{H NMR}$**  (500 MHz,  $\text{CDCl}_3$ )  $\delta$  7.33 – 7.26 (m, 2H), 7.22 (dd,  $J = 8.5, 6.0$  Hz, 1H), 7.16 (d,  $J = 7.4$  Hz, 2H), 3.28 – 3.12 (m, 2H), 3.00 (dd,  $J = 21.0, 11.1$  Hz, 1H), 2.73 – 2.60 (m, 3H), 2.48 – 2.29 (m, 2H), 1.92 – 1.77 (m, 3H)  **$^{13}\text{C NMR}$**  (126 MHz,  $\text{CDCl}_3$ )  $\delta$  140.7, 128.7, 128.2, 126.4, 56.9, 52.2, 36.3, 36.2, 33.6, 29.1. **HRMS (ESI)**: Calculated for  $(\text{C}_{12}\text{H}_{16}\text{NaS}^+)$   $[\text{M}+\text{Na}]^+$ : 215.0865, found 215.1014.



## Mechanistic Experiments

### Radical Clock Experiment:

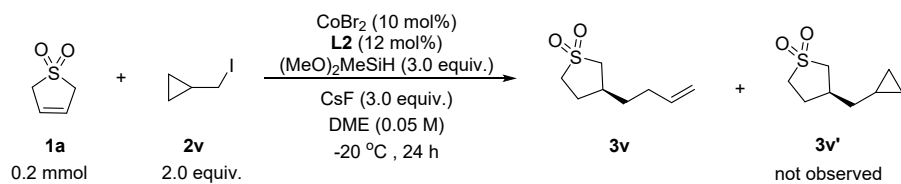

Following the general procedure A, the crude product was purified by flash column chromatography on silica gel to afford **3v** as a white solid (17% yield).

**<sup>1</sup>H NMR** (500 MHz, CDCl<sub>3</sub>) δ 5.86 – 5.75 (m, 1H), 5.03 – 4.89 (m, 2H), 3.26 – 3.17 (m, 3H), 3.03 (dd, *J* = 11.2, 5.6 Hz, 1H), 2.66 (d, *J* = 10.9 Hz, 1H), 2.39 (d, *J* = 11.0 Hz, 1H), 2.35 – 2.31 (m, 1H), 2.05 (t, *J* = 7.2 Hz, 2H), 1.83 – 1.79 (m, 1H). **<sup>13</sup>C NMR** (126 MHz, CDCl<sub>3</sub>) δ 140.4, 117.8, 57.1, 52.4, 36.9, 34.6, 33.7, 29.2.

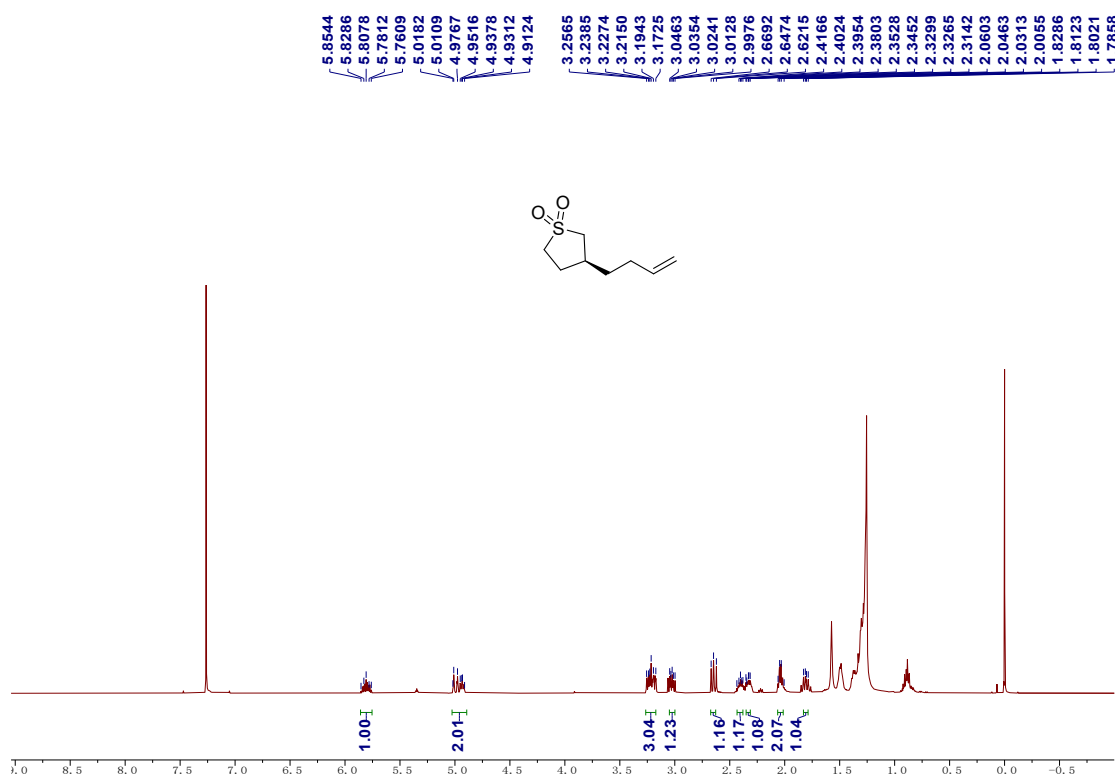

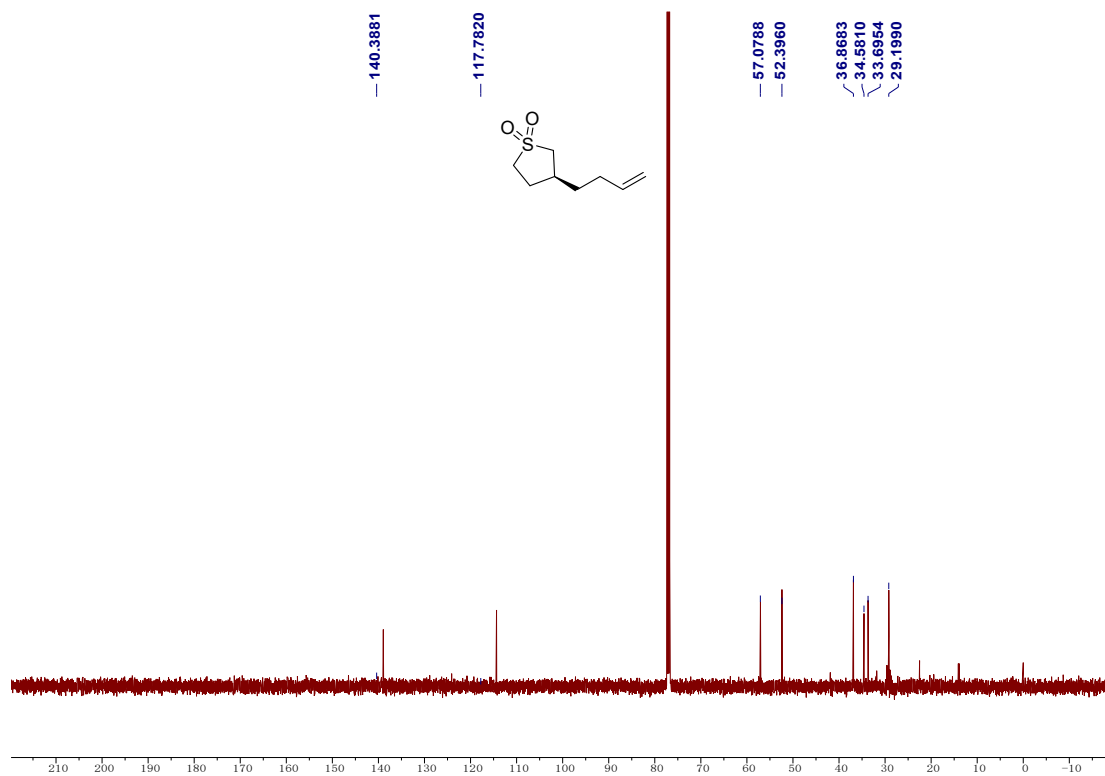

**Radical Experiment:**

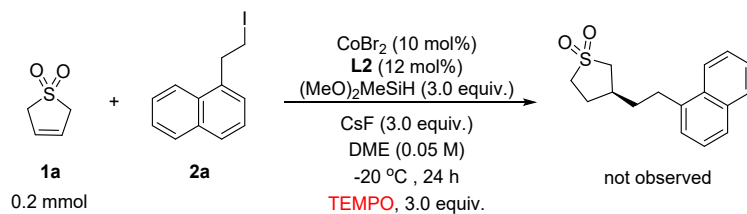

To an oven-dried 10 mL Schlenk tube containing a stirring bar was charged with CoBr<sub>2</sub> (4.4 mg, 0.02 mmol, 10 mol%), (*S, R*)-**L2** (10.7 mg, 0.024 mmol, 12 mol%) and 2.0 mL dry 1,2-dimethoxyethane in a nitrogen-filled glove-box, the mixture was stirred for 10 min at room temperature. Then **1a** (0.2 mmol, 1.0 equiv.), **2a** (0.4 mmol, 2.0 equiv.), CsF (91.1 mg, 0.6 mmol, 3.0 equiv.), 2,2,6,6-tetramethylpiperidinoxy (TEMPO) (0.6 mmol, 3.0 equiv.) and another 2.0 mL dry 1,2-dimethoxyethane were added sequentially. The tube was sealed and removed from the glove box, (MeO)<sub>2</sub>MeSiH (63.7 mg, 0.6 mmol, 3.0 equiv.) was added dropwise at -20 °C and the reaction was stirred at -20 °C for 24 h. No product was found by TLC monitoring and GC-MS was not detected the molecular weight of desired product.

### Deuterium experiments with $\text{Ph}_2\text{SiD}_2$ :

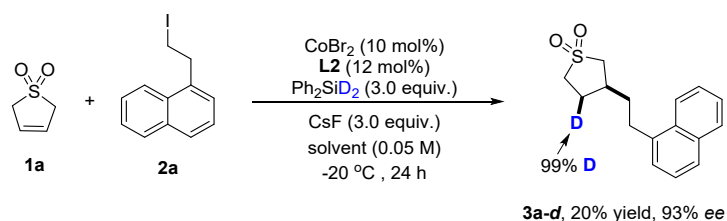

To an oven-dried 10 mL Schlenk tube containing a stirring bar was charged with  $\text{CoBr}_2$  (4.4 mg, 0.02 mmol, 10 mol%), (*S, R*)-**L2** (10.7 mg, 0.024 mmol, 12 mol%) and 2.0 mL dry 1,2-dimethoxyethane in a nitrogen-filled glovebox, the mixture was stirred for 10 min at room temperature. Then **1a** (0.2 mmol, 1.0 equiv), **2a** (0.4 mmol, 2.0 equiv.), CsF (91.1 mg, 0.6 mmol, 3.0 equiv.) and another 2.0 mL dry 1,2-dimethoxyethane were added sequentially. The tube was sealed and removed from the glove box,  $\text{Ph}_2\text{SiD}_2$ <sup>[2]</sup> (111.8 mg, 0.6 mmol, 3.0 equiv.) was added dropwise at  $-20\text{ }^\circ\text{C}$  and the reaction was stirred at  $-20\text{ }^\circ\text{C}$  for 24 h. After the reaction was completed, the reaction mixture was diluted with saturated  $\text{NH}_4\text{Cl}$  (aq., 2.0 mL) and EtOAc (5 mL). The aqueous phase was extracted with EtOAc ( $2 \times 5$  mL). The organic phase was dried over  $\text{Na}_2\text{SO}_4$ , filtered, and the solvent removed in vacuo. The crude mixture was purified by flash column chromatography on silica gel using a mixture of Hexane/EtOAc as eluent to obtain the desired product **3a-d** in 20% isolated yield with 93% *ee*.

**$^1\text{H NMR}$**  (500 MHz,  $\text{CDCl}_3$ )  $\delta$  7.95 (d,  $J = 8.2$  Hz, 1H), 7.87 (d,  $J = 7.2$  Hz, 1H), 7.74 (d,  $J = 8.2$  Hz, 1H), 7.56 – 7.45 (m, 2H), 7.41 – 7.38 (m, 1H), 7.29 (d,  $J = 7.0$  Hz, 1H), 3.30 (dd,  $J = 13.1, 7.4$  Hz, 1H), 3.20 (d,  $J = 13.3$  Hz, 1H), 3.12 (t,  $J = 7.8$  Hz, 2H), 3.06 – 2.99 (m, 1H), 2.78 – 2.67 (m, 1H), 2.57 – 2.44 (m, 1H), 2.41 – 2.34 (m, 1H), 2.03 – 1.93 (m, 2H).  **$^{13}\text{C NMR}$**  (126 MHz,  $\text{CDCl}_3$ )  $\delta$  136.7, 134.0, 131.5, 129.1, 127.3, 126.1, 126.0, 125.7, 125.6, 123.3, 56.9, 52.2, 36.5, 35.6, 31.5, 30.9.

**HPLC** (UltiMate 3000): Daicel Chiralpak IC Column (*n*-Hexane/*i*-PrOH = 30 : 70, 1 mL/min),  $30\text{ }^\circ\text{C}$ , 220 nm,  $R_t = 19.015$  min (minor) and 20.665 min (major).

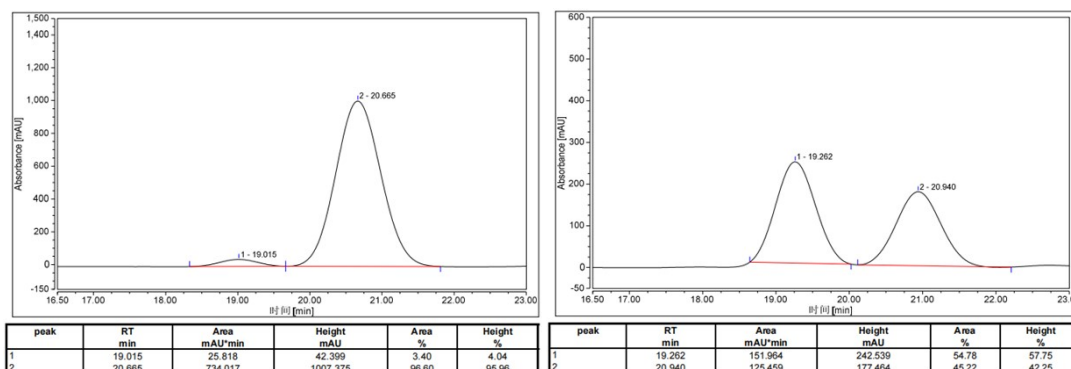

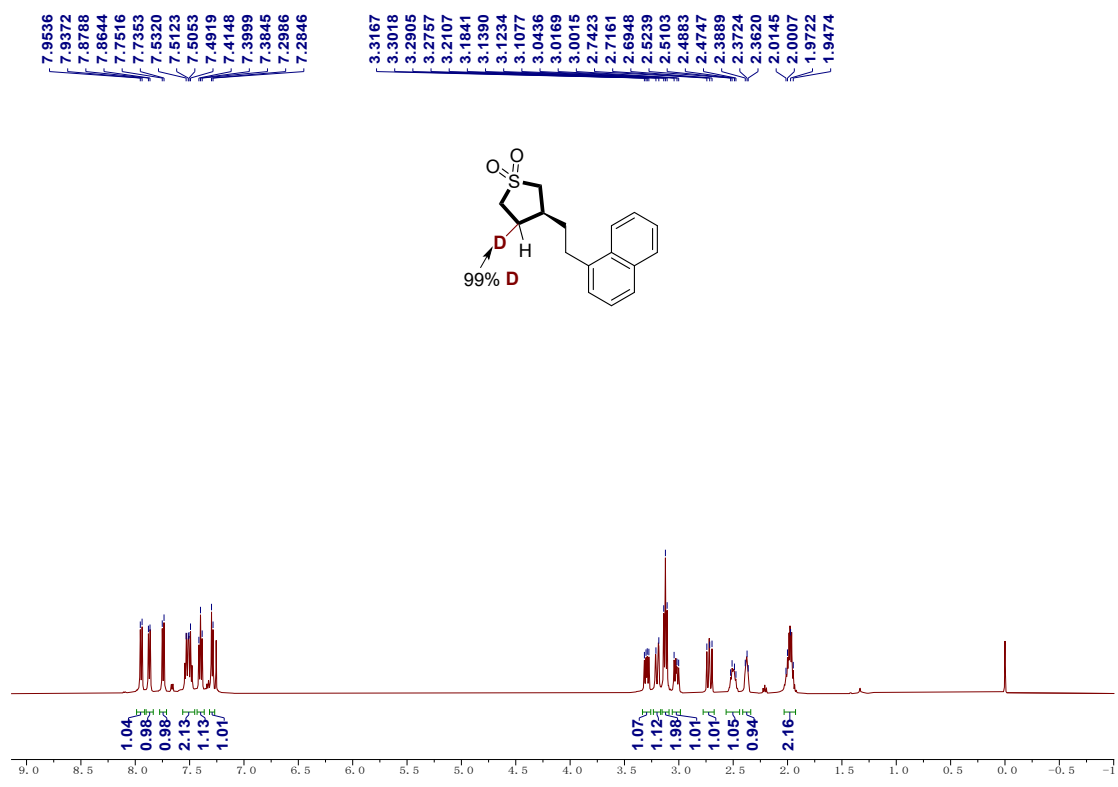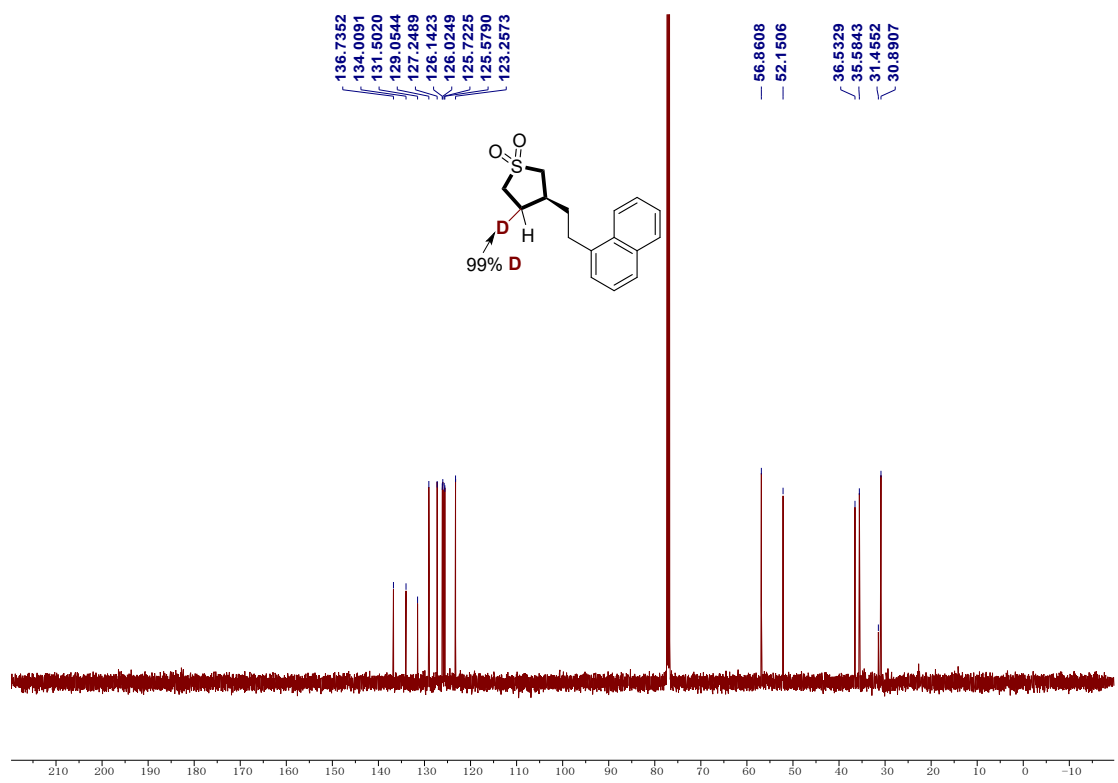

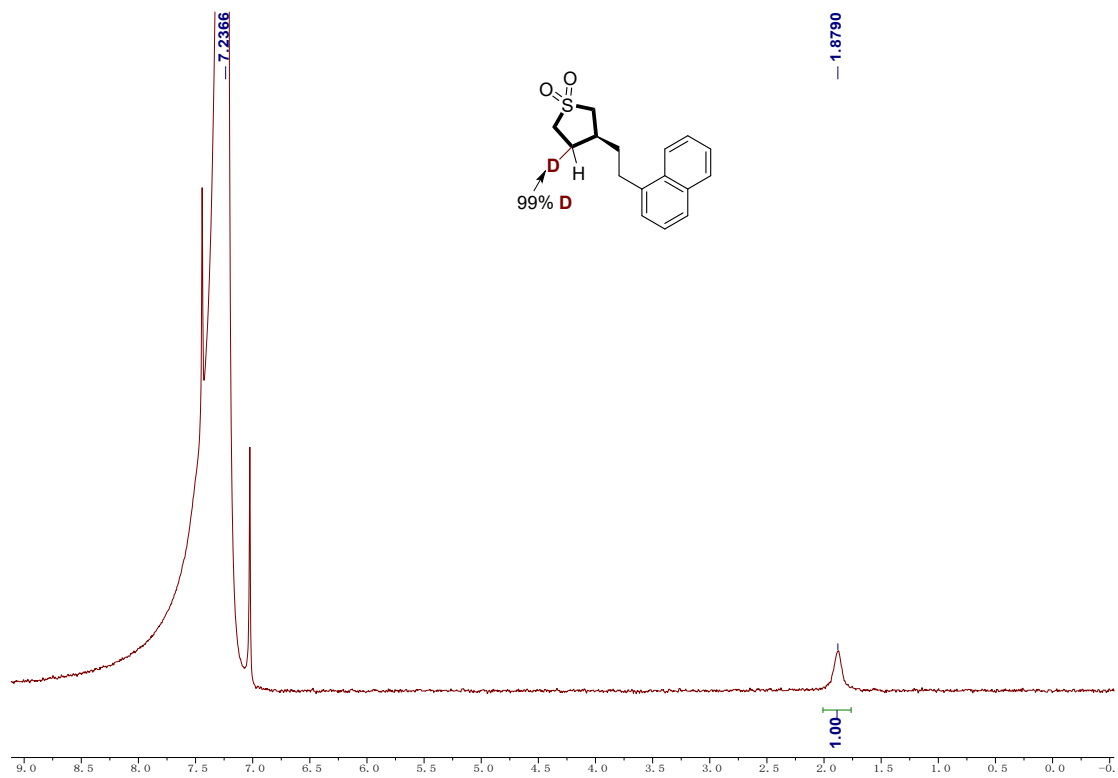

## ***References***

- [1] F. G. Bordwell, W. H. McKellin, *J. Am. Chem. Soc.* **1951**, *73*, 2251-2253.
- [2] N. Gandhamsetty, S. Park, S. Chang, *J. Am. Chem. Soc.* **2015**, *137*, 15176-15184.

### X-ray Crystallographic data for (S)-3p

Single crystals for X-ray studies were grown by slow evaporation of a solution of compound **3p** in a mixture of hexane and DCM at room temperature. X-Ray structural analysis of single crystal **3p** was obtained to confirm the absolute configuration. The X-ray data of **3p** is deposited in the Cambridge Crystallographic Data Centre with a number CCDC 2322228.

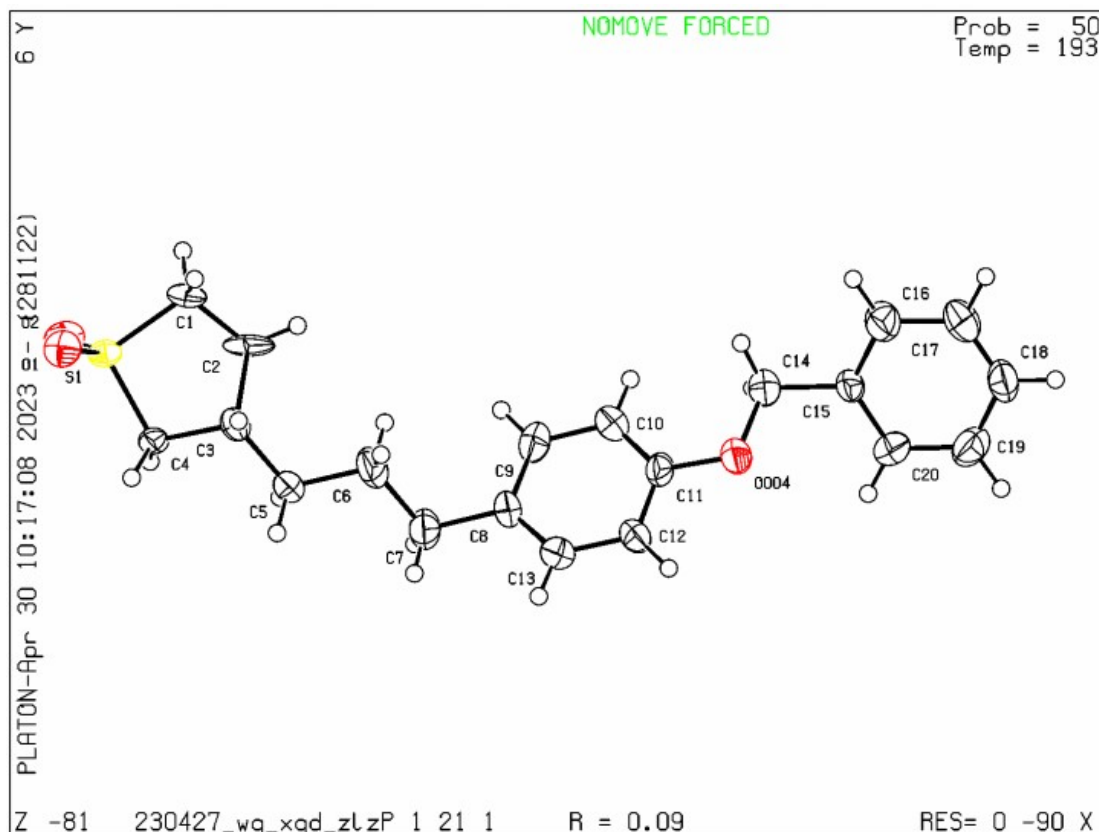

Figure S1. X-ray structure of **3p**

Table S8. Crystal data and structure refinement for **3p**

|                      |                                                  |                  |
|----------------------|--------------------------------------------------|------------------|
| Identification code  | 230427_WQ_XGD_ZLZ_0m                             |                  |
| Empirical formula    | C <sub>20</sub> H <sub>24</sub> O <sub>3</sub> S |                  |
| Formula weight       | 344.45                                           |                  |
| Temperature          | 193 K                                            |                  |
| Wavelength           | 0.71073 Å                                        |                  |
| Crystal system       | Monoclinic                                       |                  |
| Space group          | P2 <sub>1</sub>                                  |                  |
| Unit cell dimensions | a = 6.243(2) Å                                   | α = 90°.         |
|                      | b = 8.030(3) Å                                   | β = 94.875(10)°. |
|                      | c = 19.073(7) Å                                  | γ = 90°.         |
| Volume               | 952.7(6) Å <sup>3</sup>                          |                  |



|                                   |                                                   |
|-----------------------------------|---------------------------------------------------|
| Z                                 | 2                                                 |
| Density (calculated)              | 1.201 Mg/m <sup>3</sup>                           |
| Absorption coefficient            | 0.184 mm <sup>-1</sup>                            |
| F(000)                            | 368.0                                             |
| Crystal size                      | 0.13 x 0.12 x 0.1 mm <sup>3</sup>                 |
| Radiation                         | MoK $\alpha$ ( $\lambda$ = 0.71073)               |
| Theta range for data collection   | 2.143 to 25.186°.                                 |
| Index ranges                      | -7<=h<=6, -9<=k<=9, -22<=l<=22                    |
| Reflections collected             | 5375                                              |
| Independent reflections           | 3180 [R(int) = 0.0497]                            |
| Data / restraints / parameters    | 3180 / 1 / 217                                    |
| Goodness-of-fit on F <sup>2</sup> | 1.121                                             |
| Final R indices [I>2sigma(I)]     | R <sub>1</sub> = 0.0922, wR <sub>2</sub> = 0.2420 |
| R indices (all data)              | R <sub>1</sub> = 0.1040, wR <sub>2</sub> = 0.2547 |
| Absolute structure parameter      | 0.19(10)                                          |
| Largest diff. peak and hole       | 0.10 and -0.61 e.Å <sup>-3</sup>                  |

# <sup>1</sup>H NMR, <sup>13</sup>C NMR, and <sup>19</sup>F NMR spectra

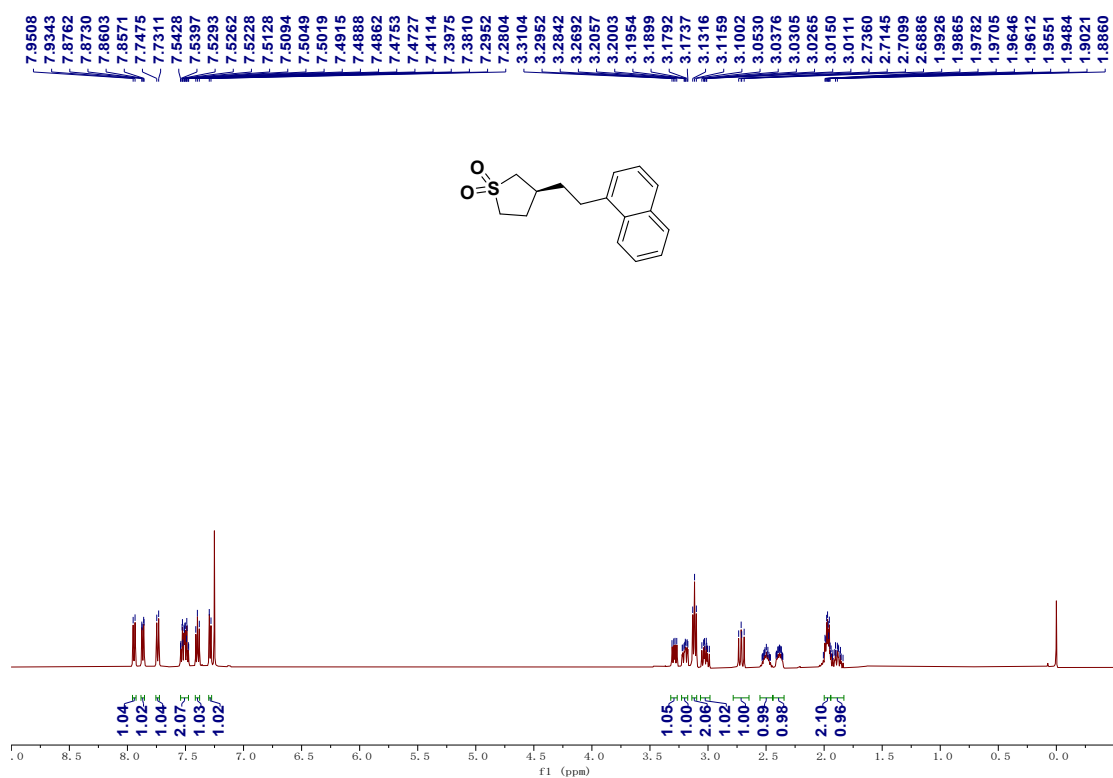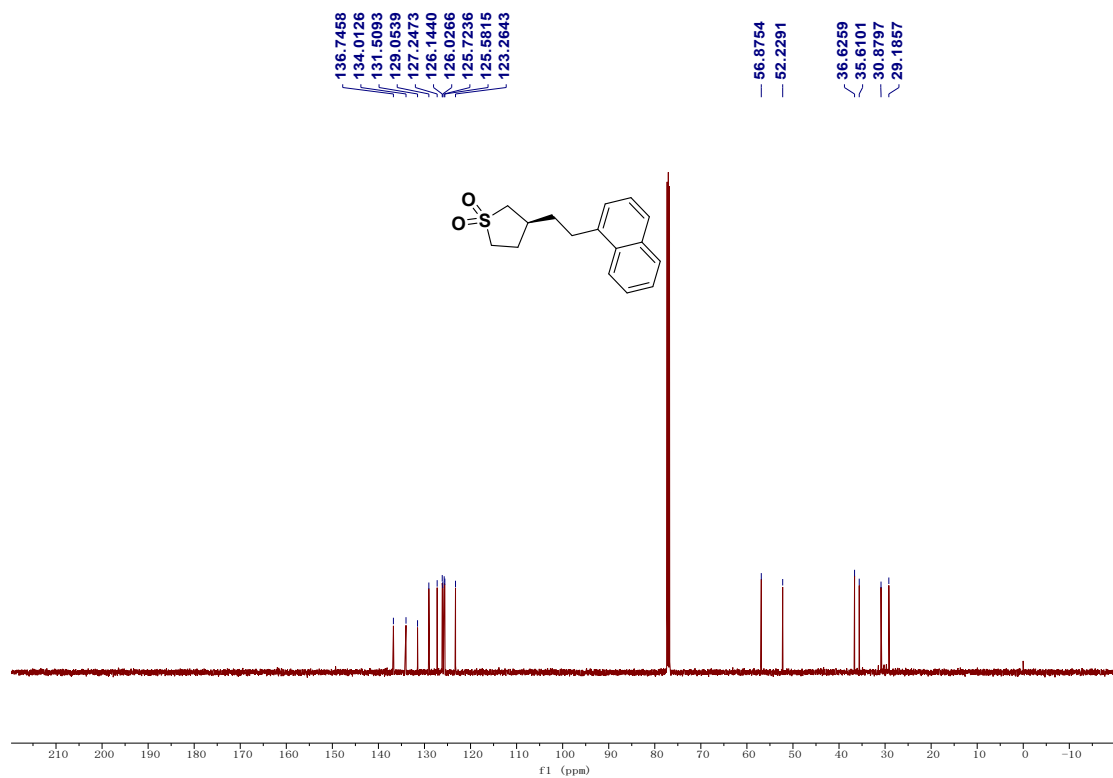

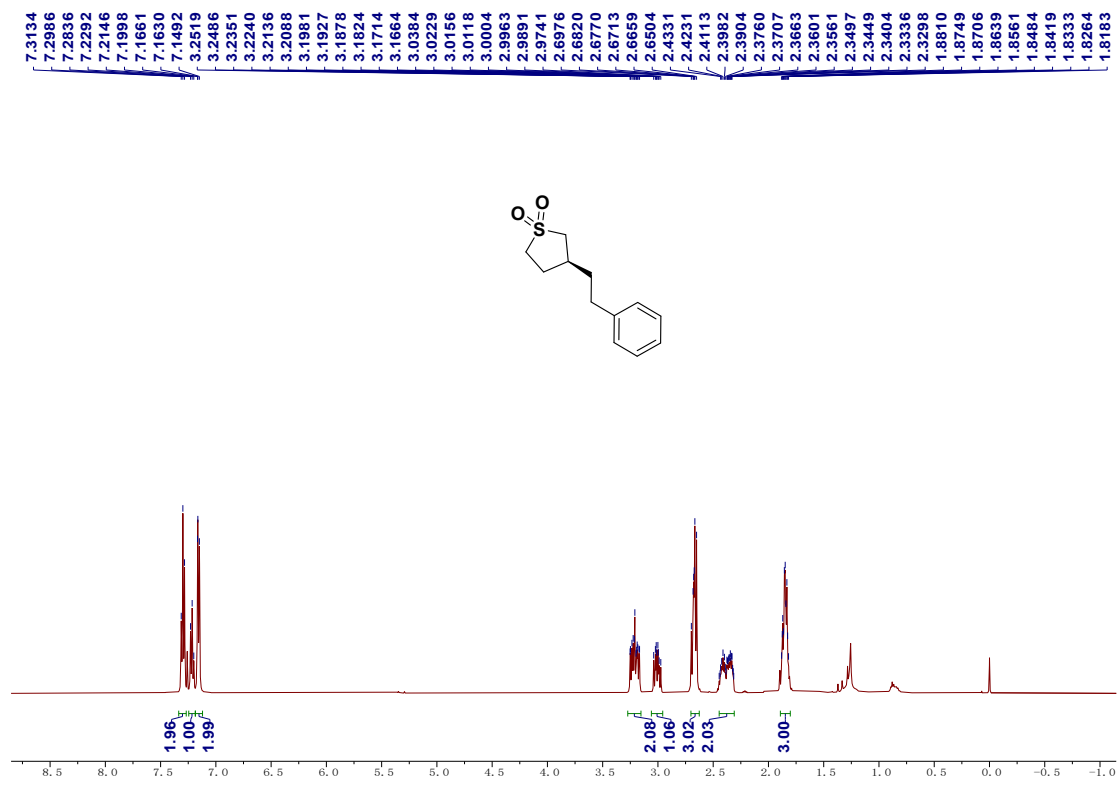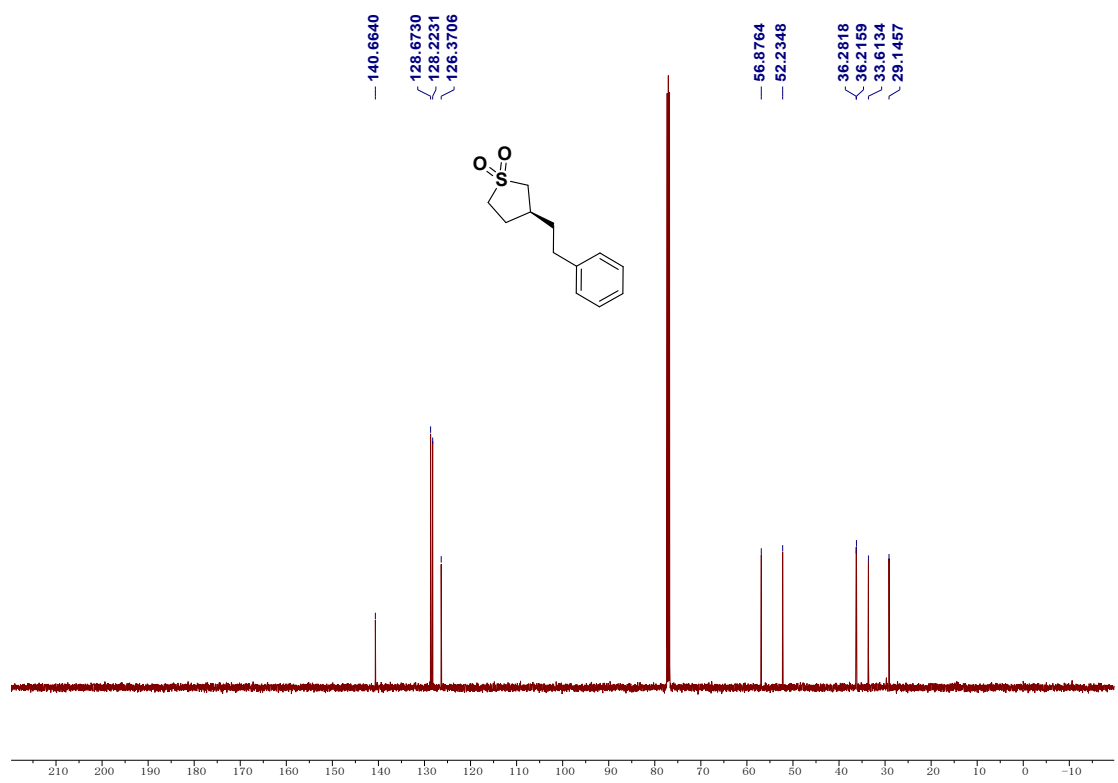

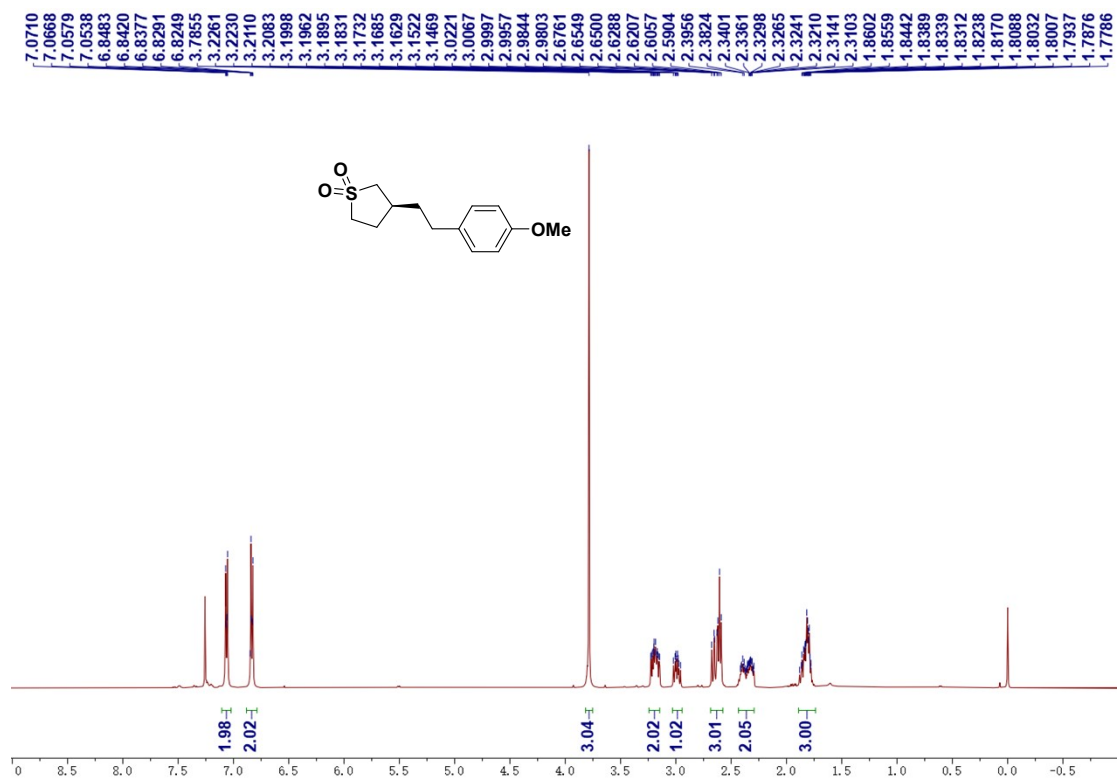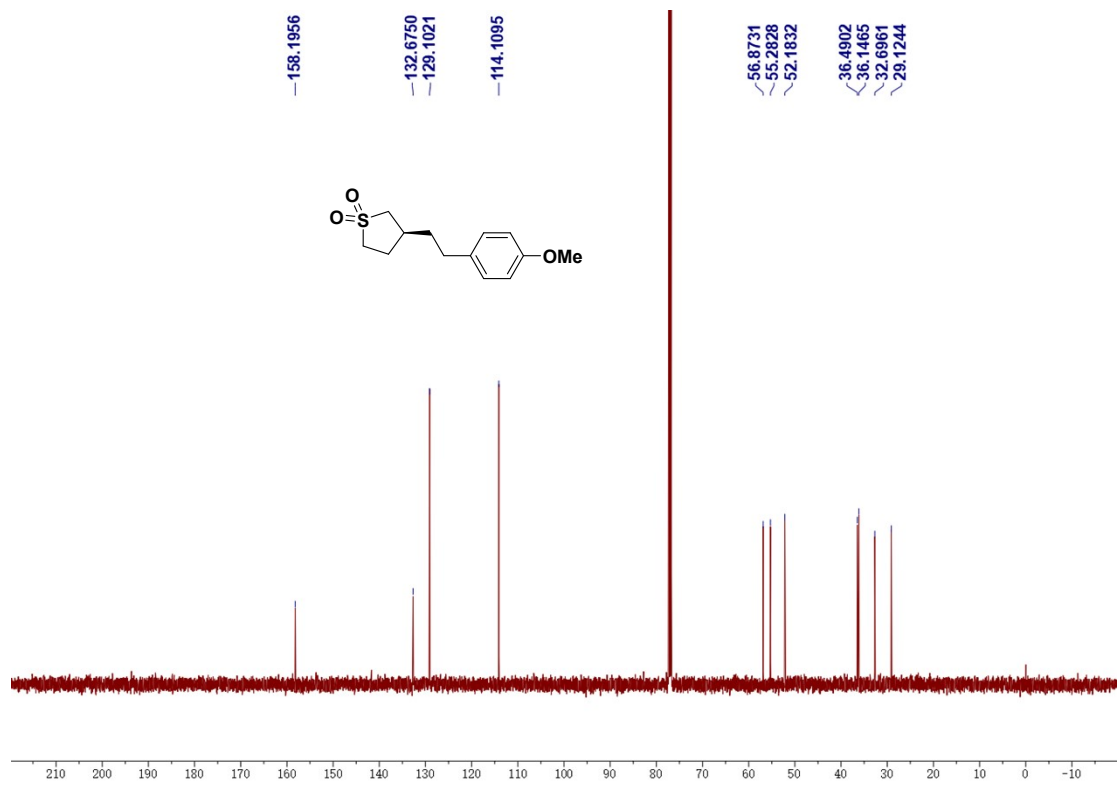

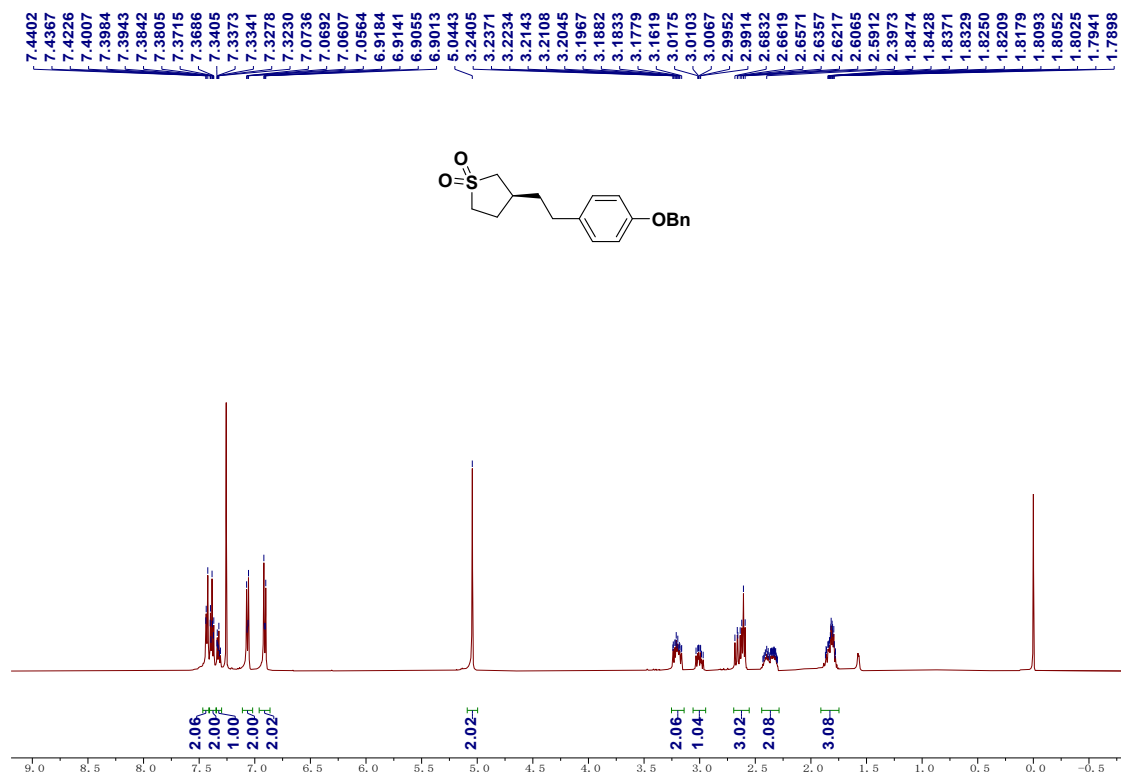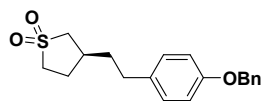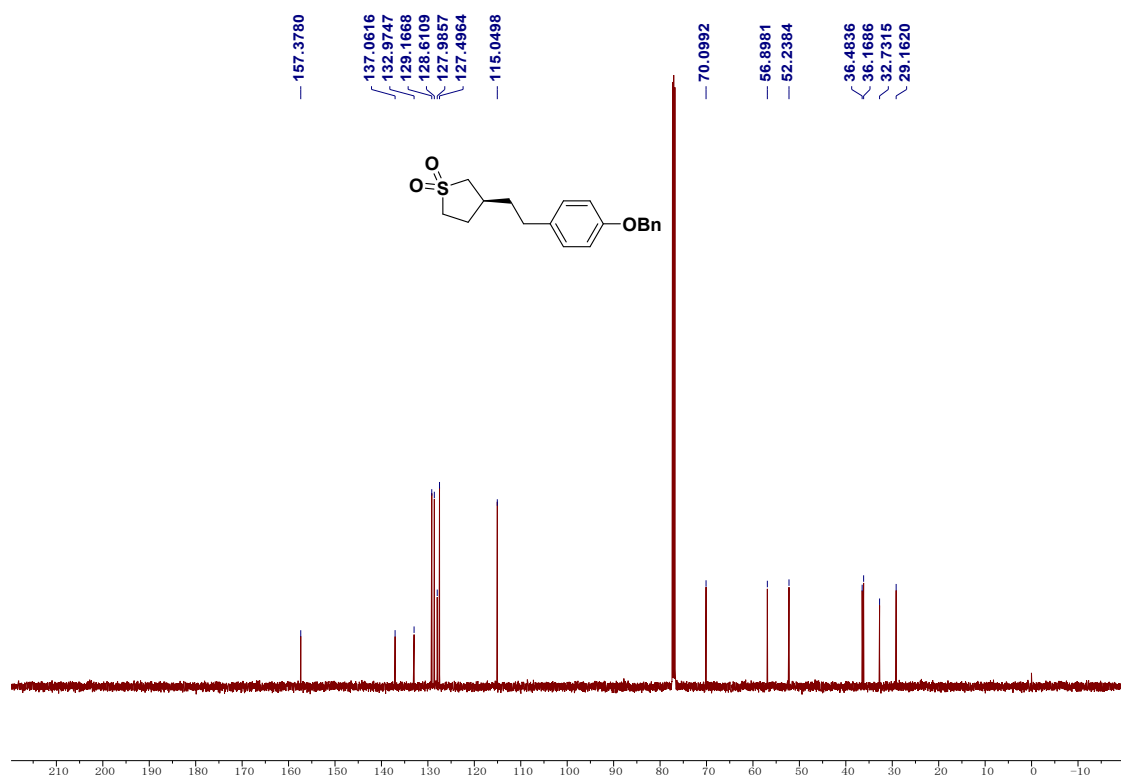

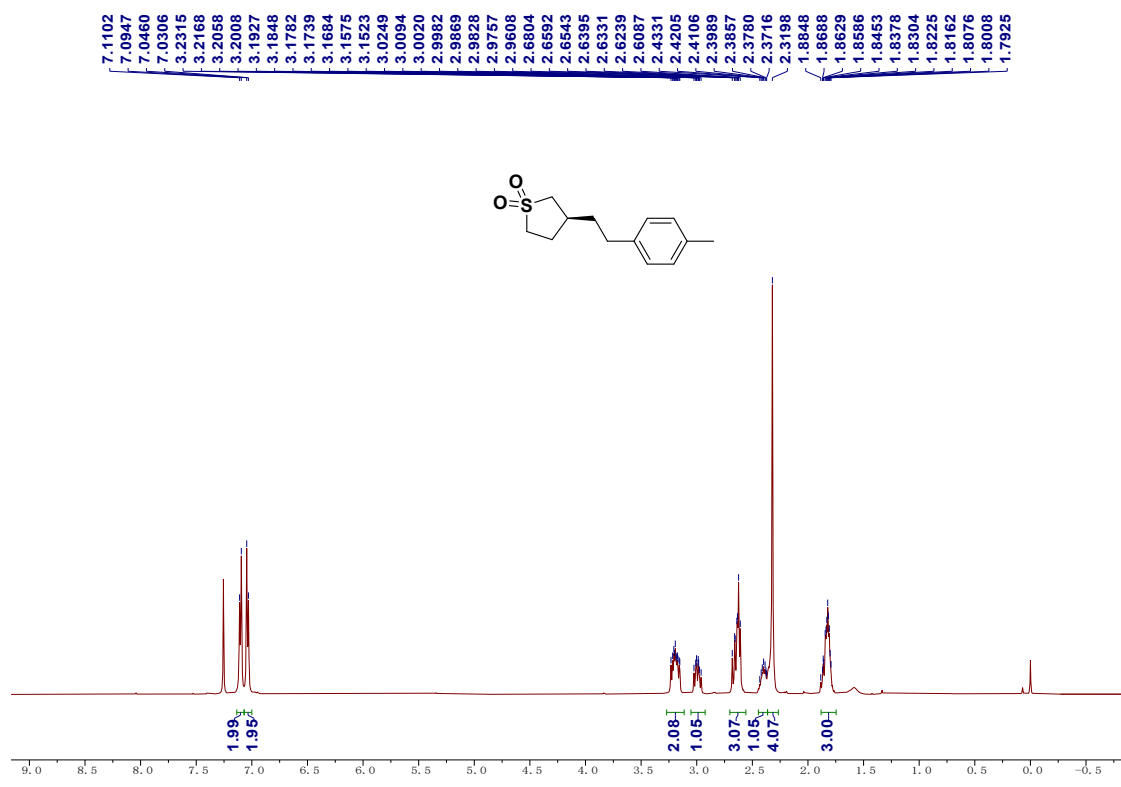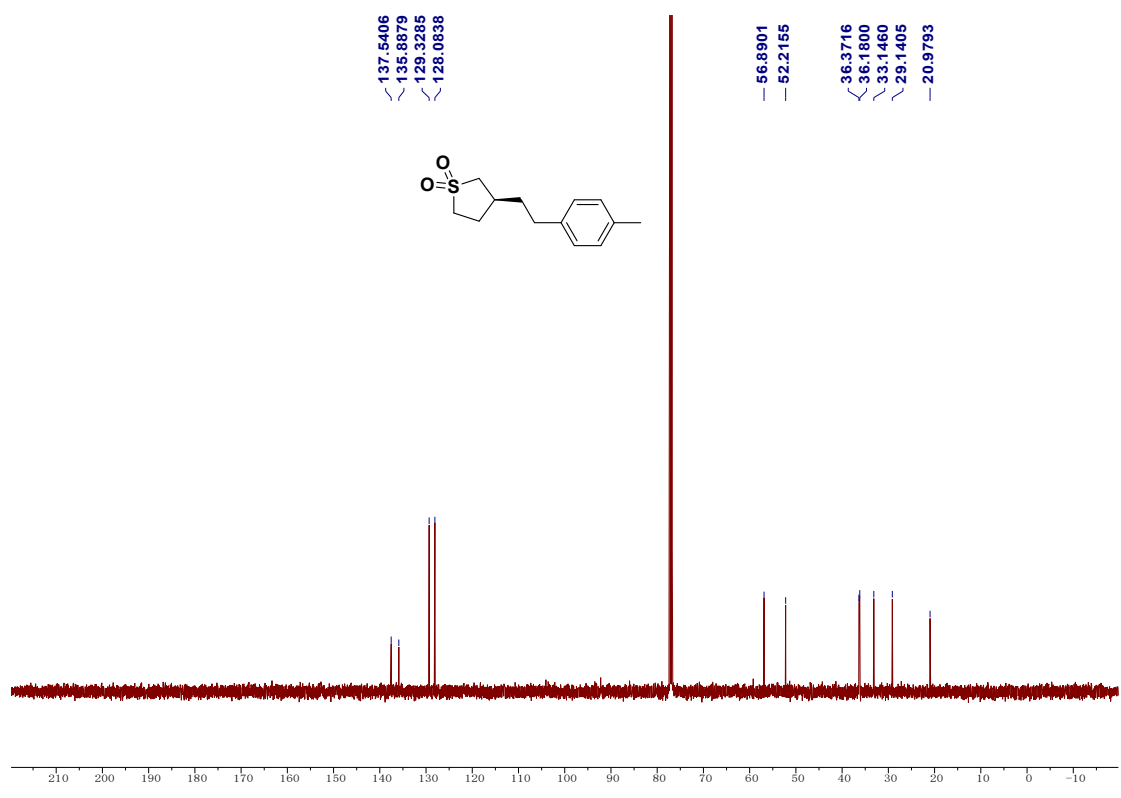

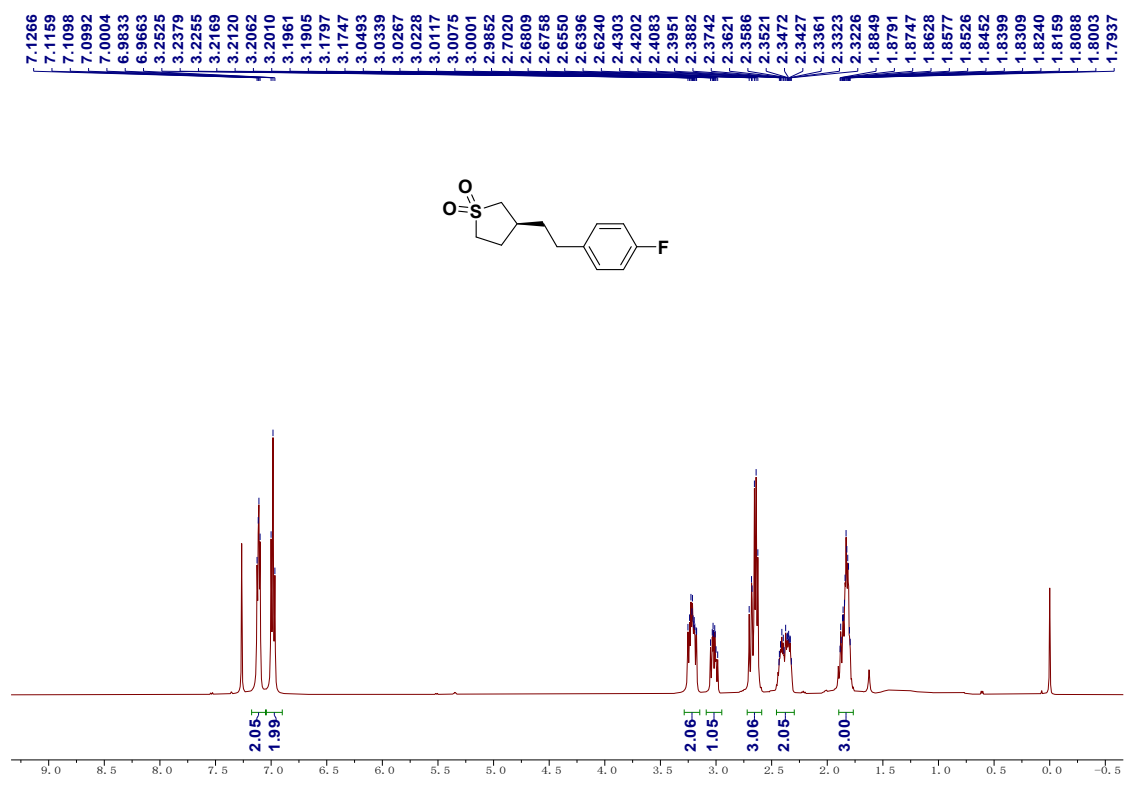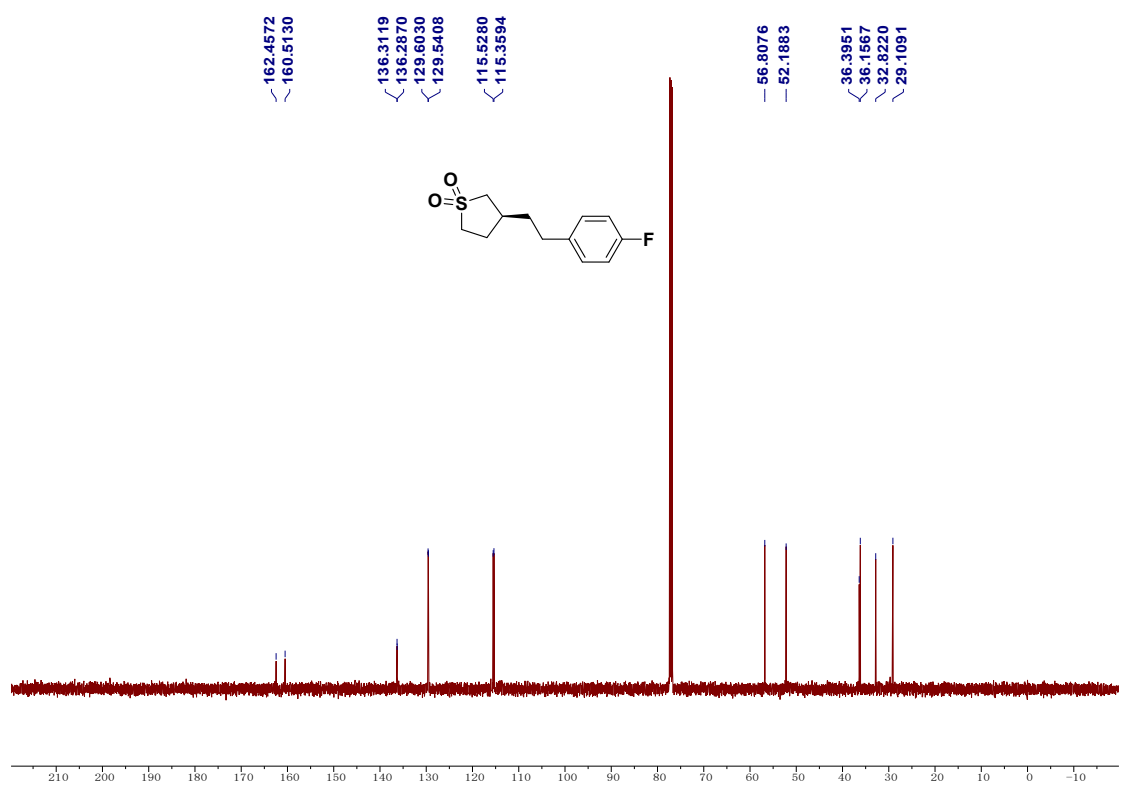

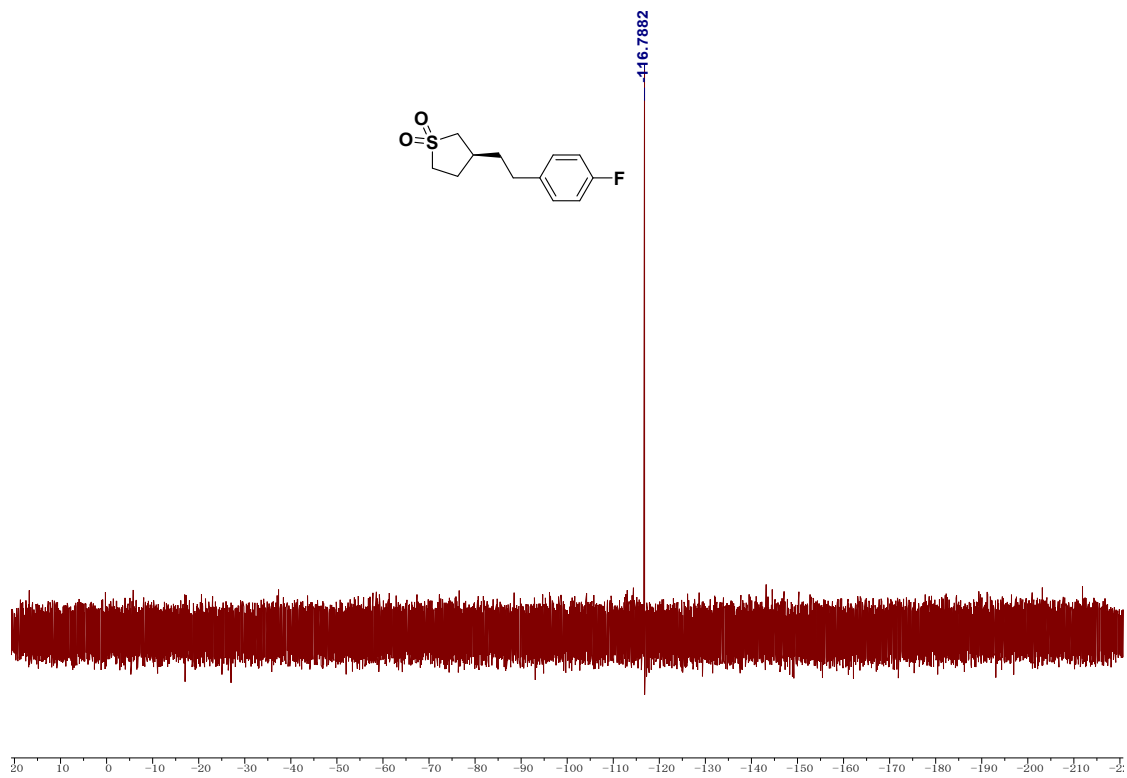



7.3258  
7.3092  
7.0953  
7.0789  
3.2611  
3.2577  
3.2459  
3.2429  
3.2351  
3.2320  
3.2200  
3.2171  
3.2114  
3.2005  
3.1953  
3.1905  
3.1850  
3.1749  
3.1732  
3.1691  
3.0432  
3.0285  
3.0272  
3.0212  
3.0197  
3.0168  
3.0055  
3.0014  
2.9792  
2.7014  
2.6800  
2.6753  
2.6543  
2.6510  
2.6471  
2.6370  
2.6334  
2.6198  
2.6168  
2.4177  
2.4040  
2.3837  
2.3688  
2.3577  
2.3545  
2.3524  
2.3491  
2.3423  
2.3384  
1.8741  
1.8606  
1.8580  
1.8539  
1.8478  
1.8460  
1.8386  
1.8324  
1.8301  
1.8236  
1.8088

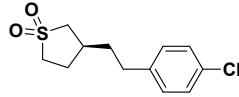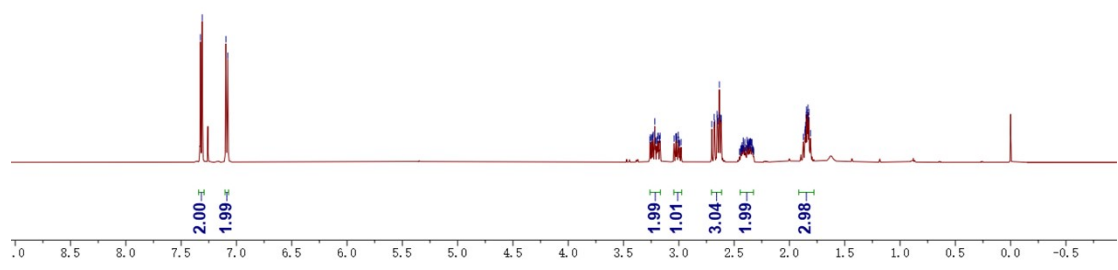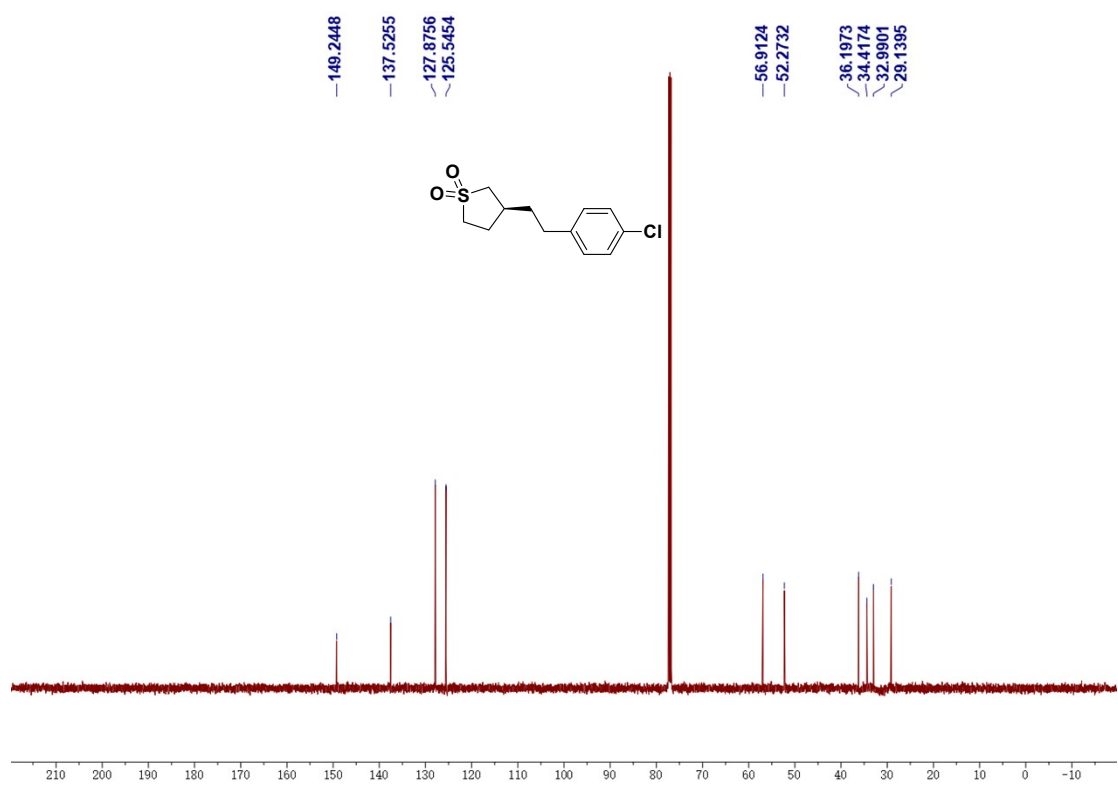

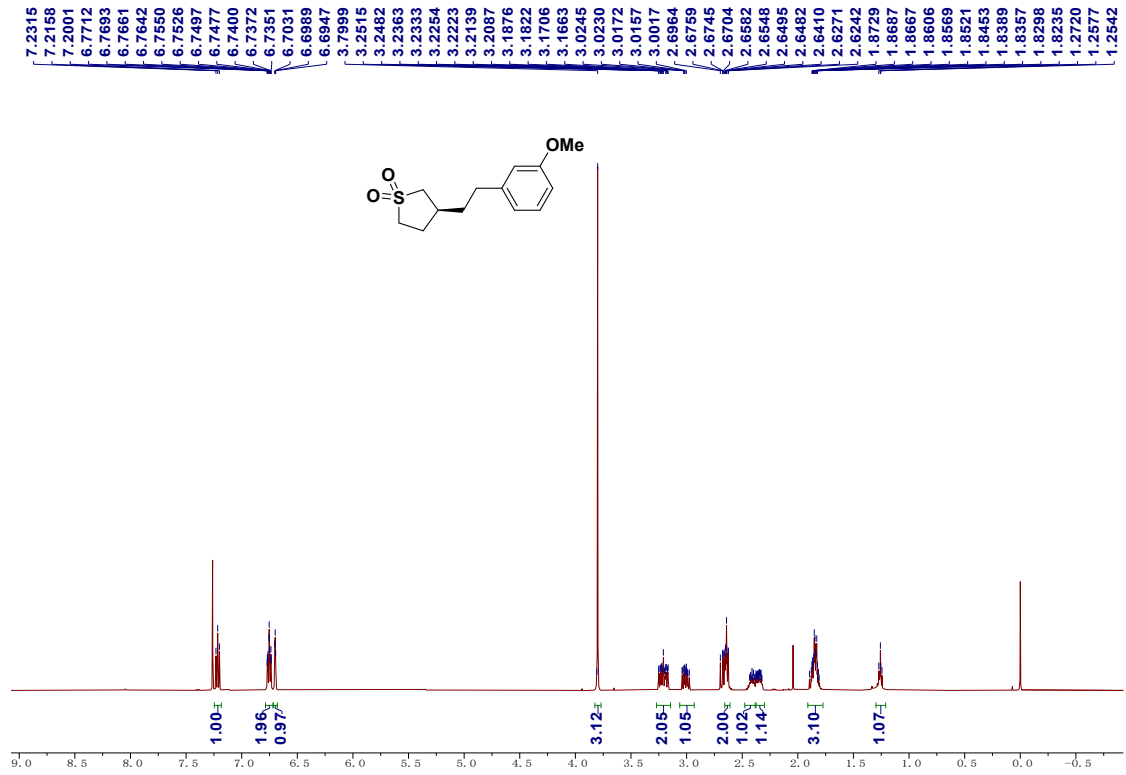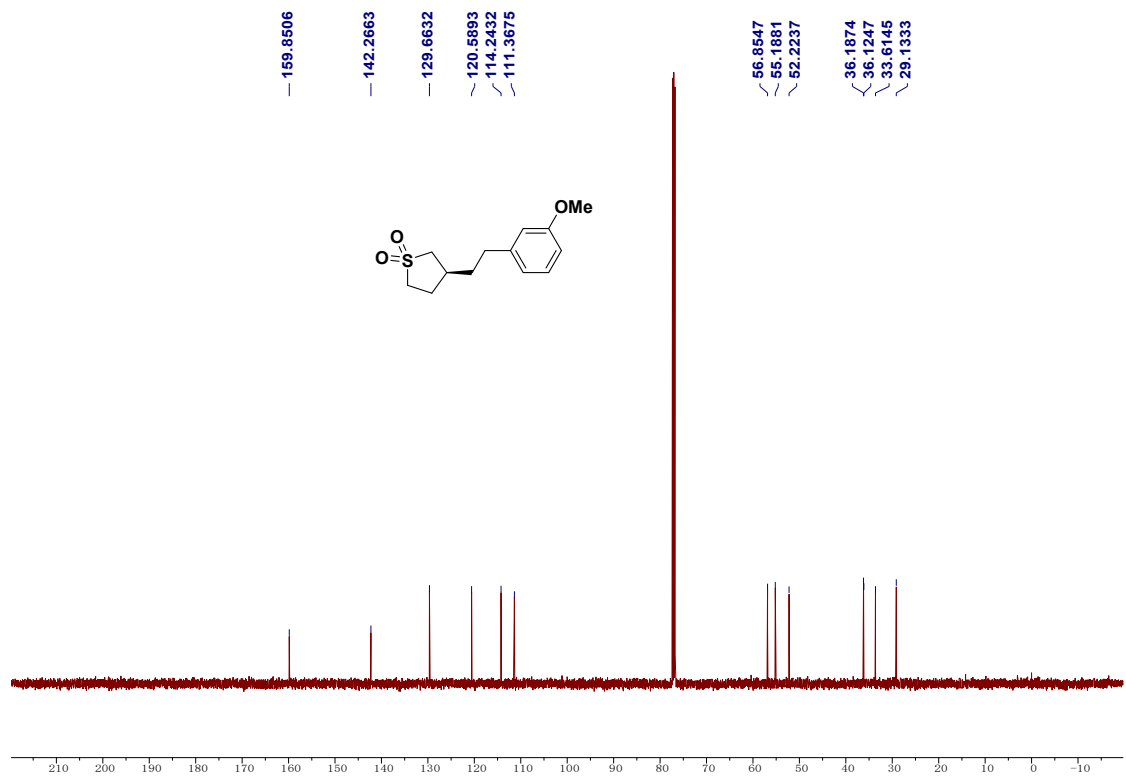

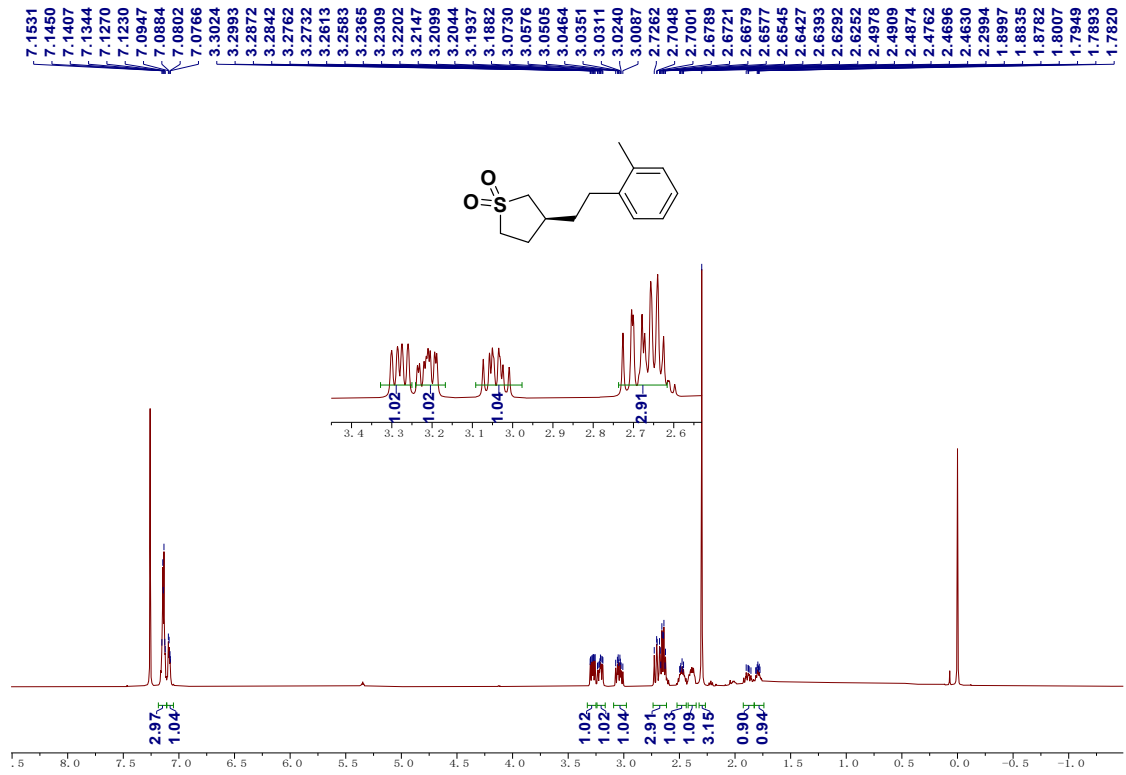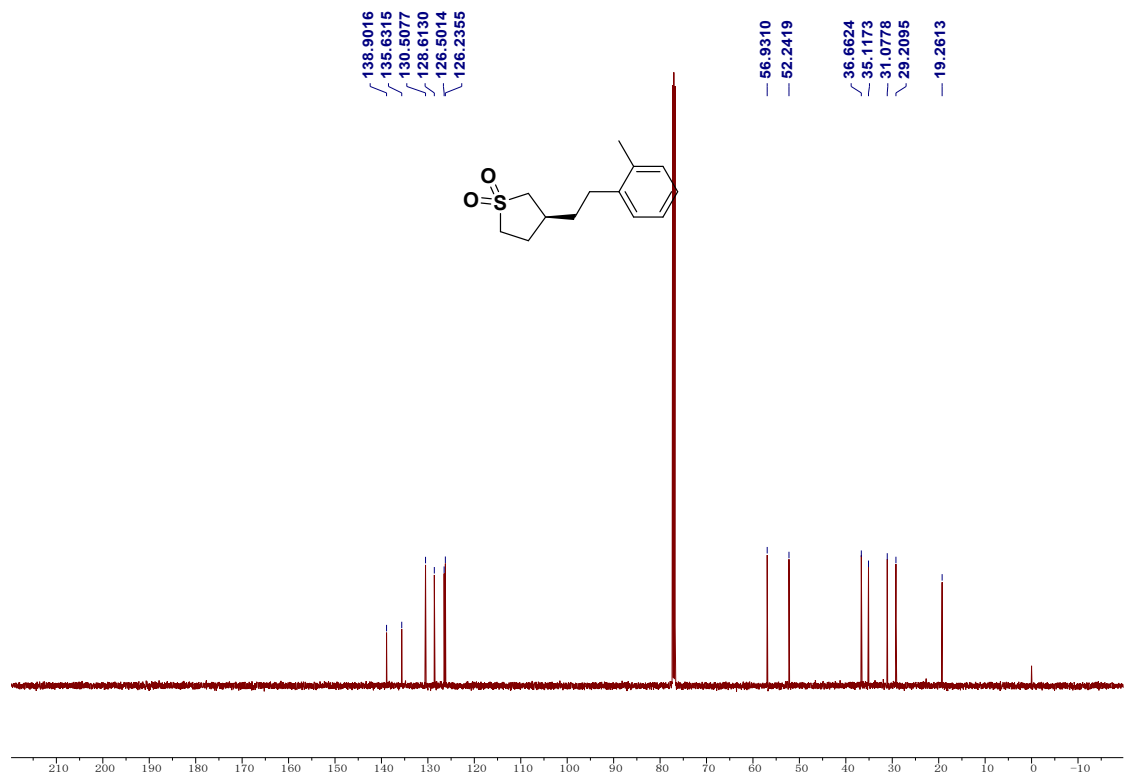

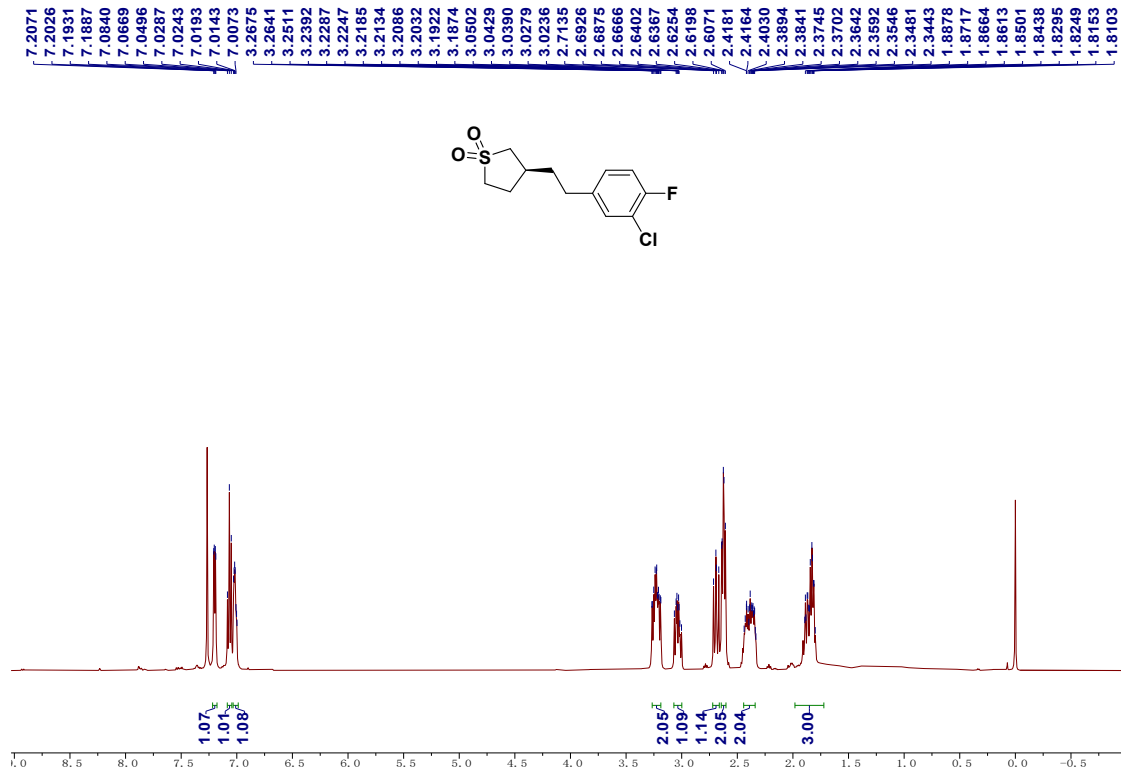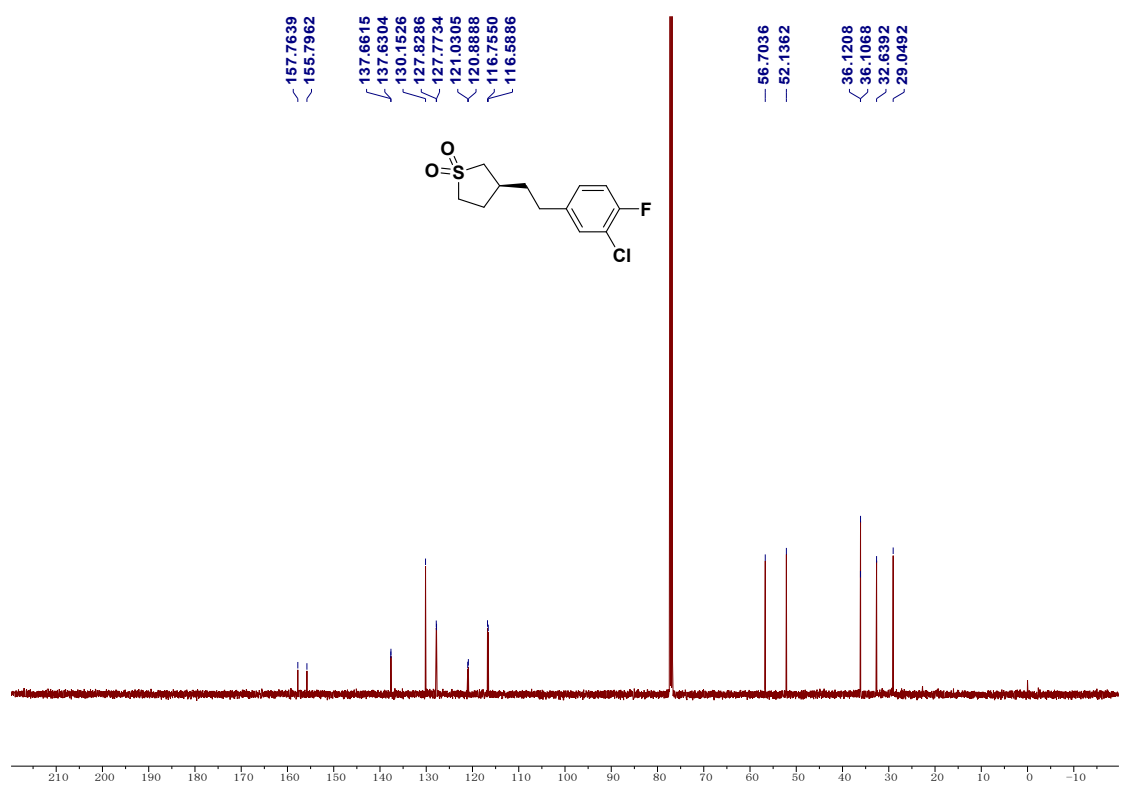

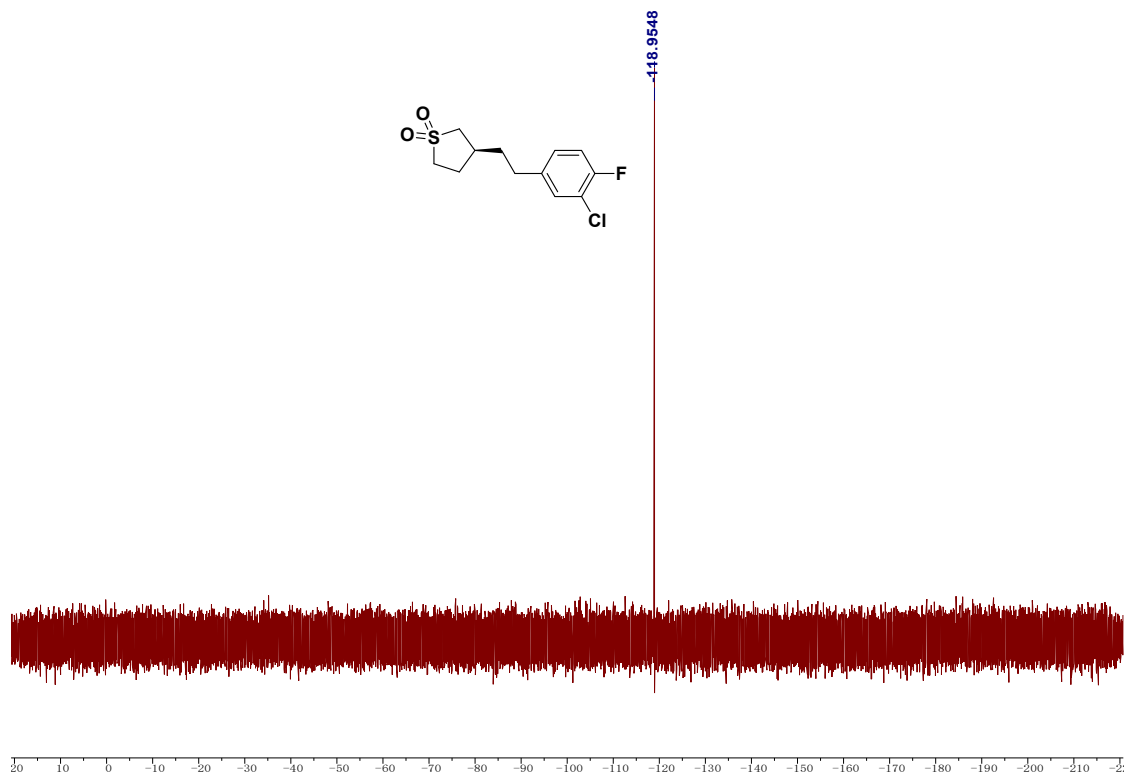

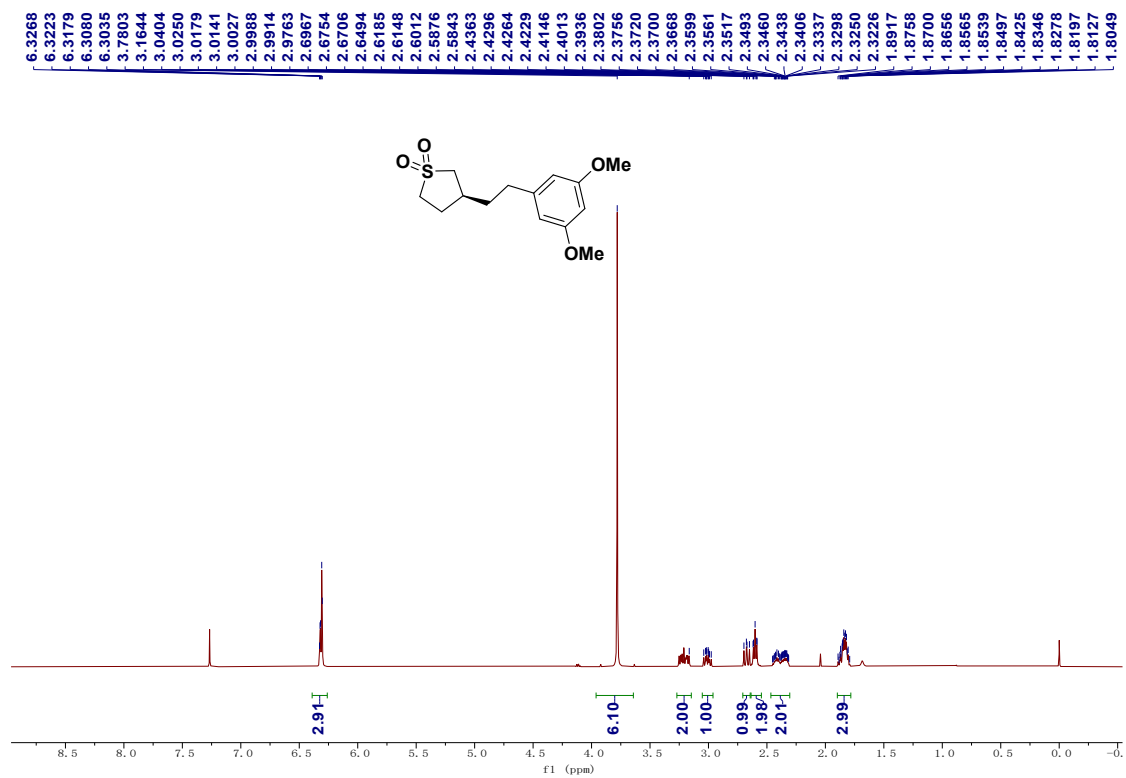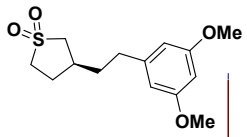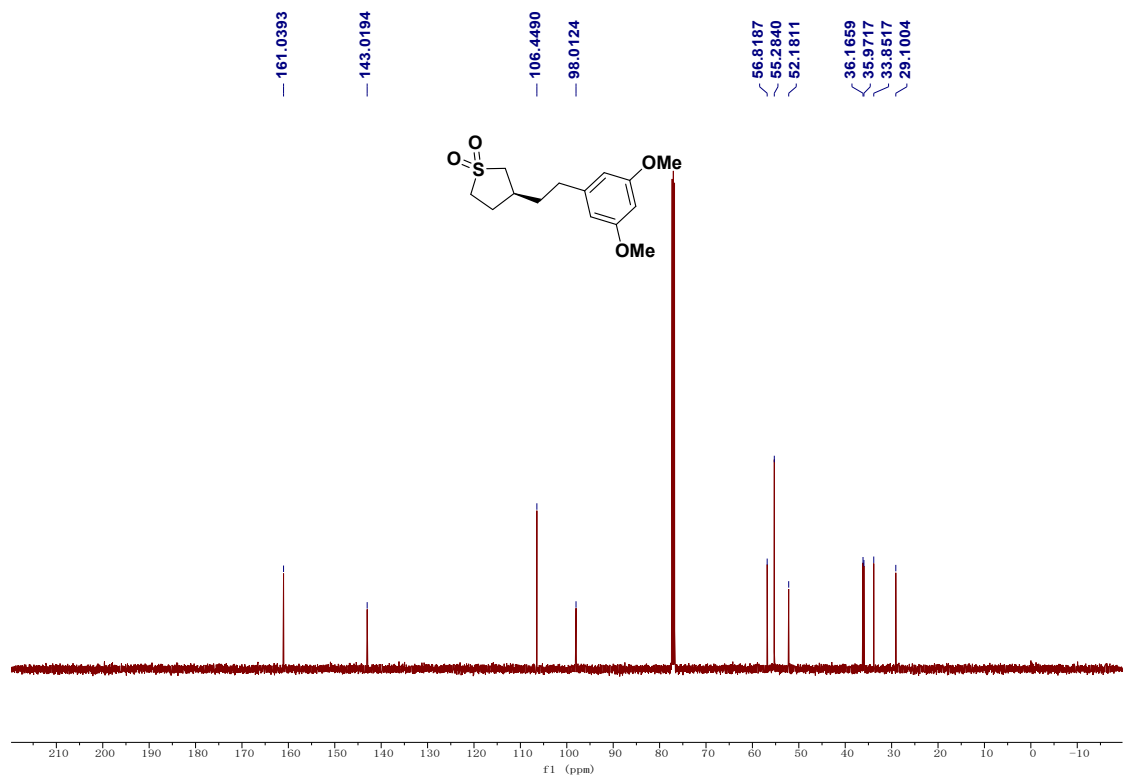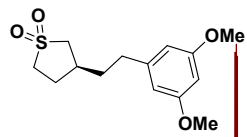

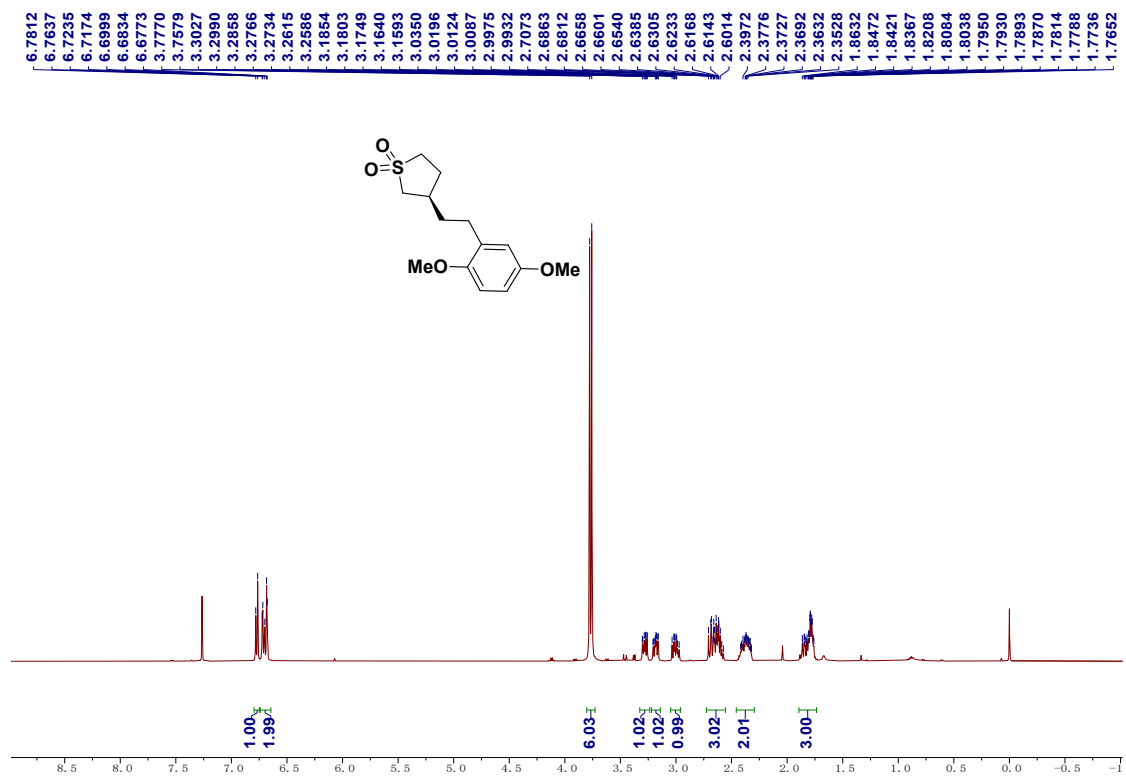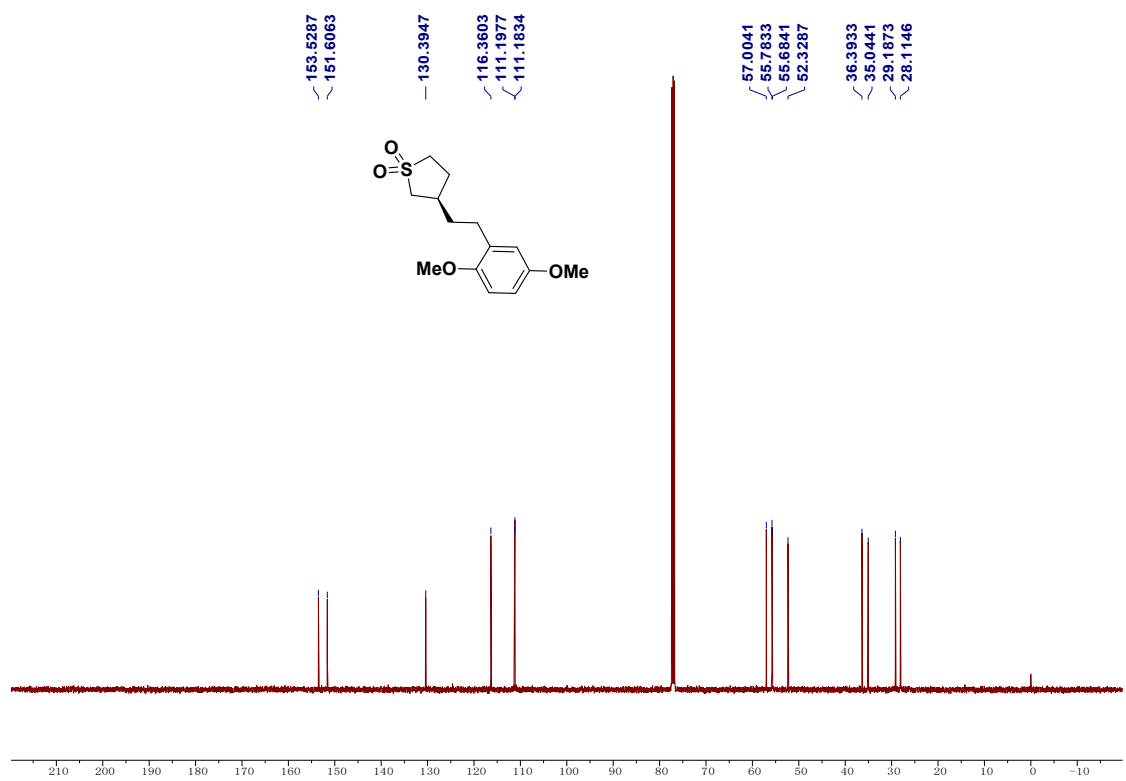

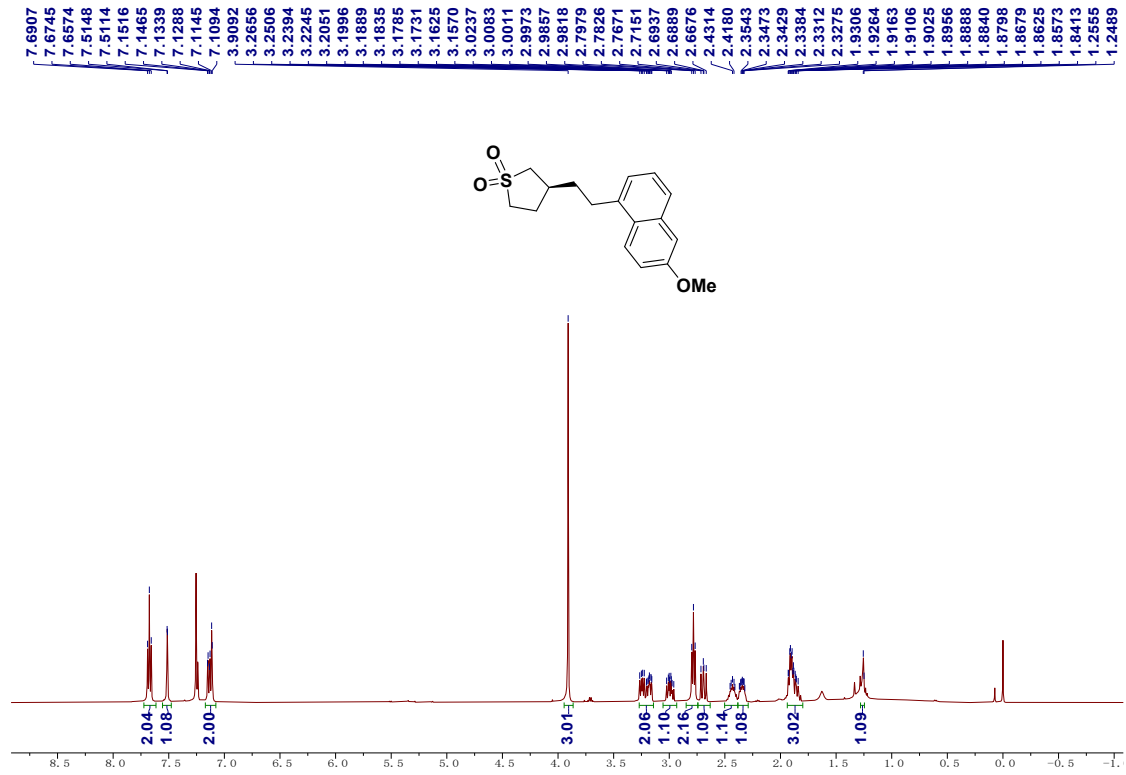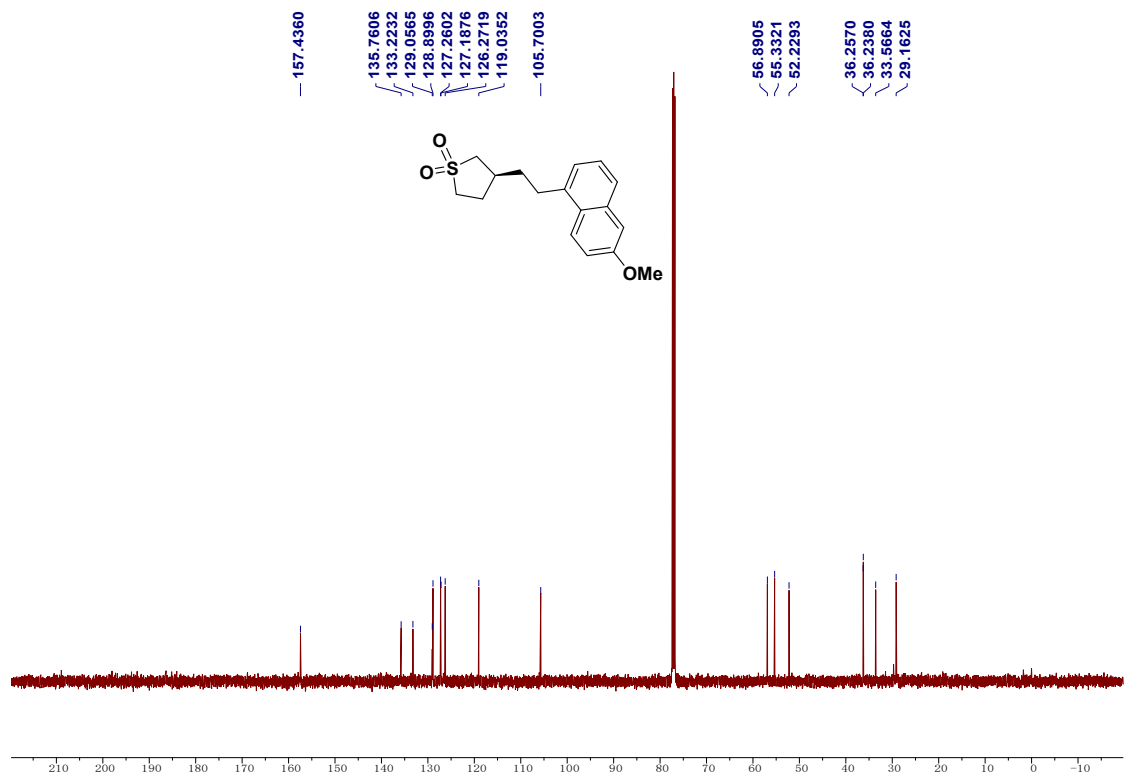



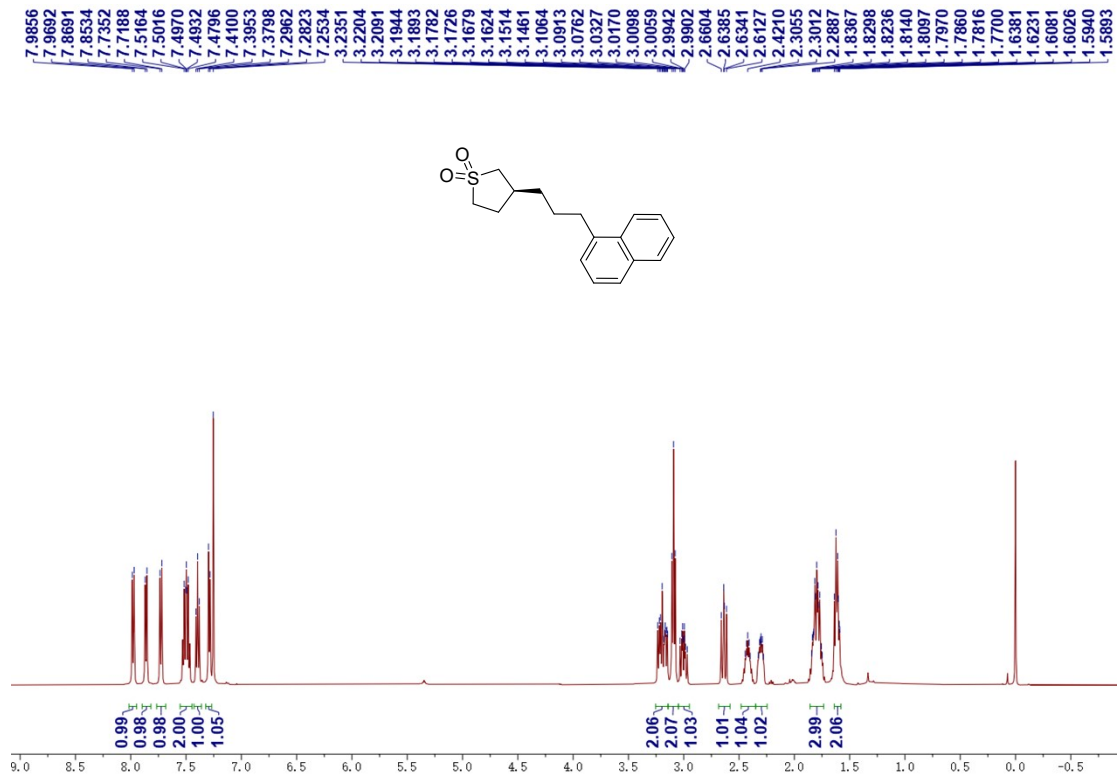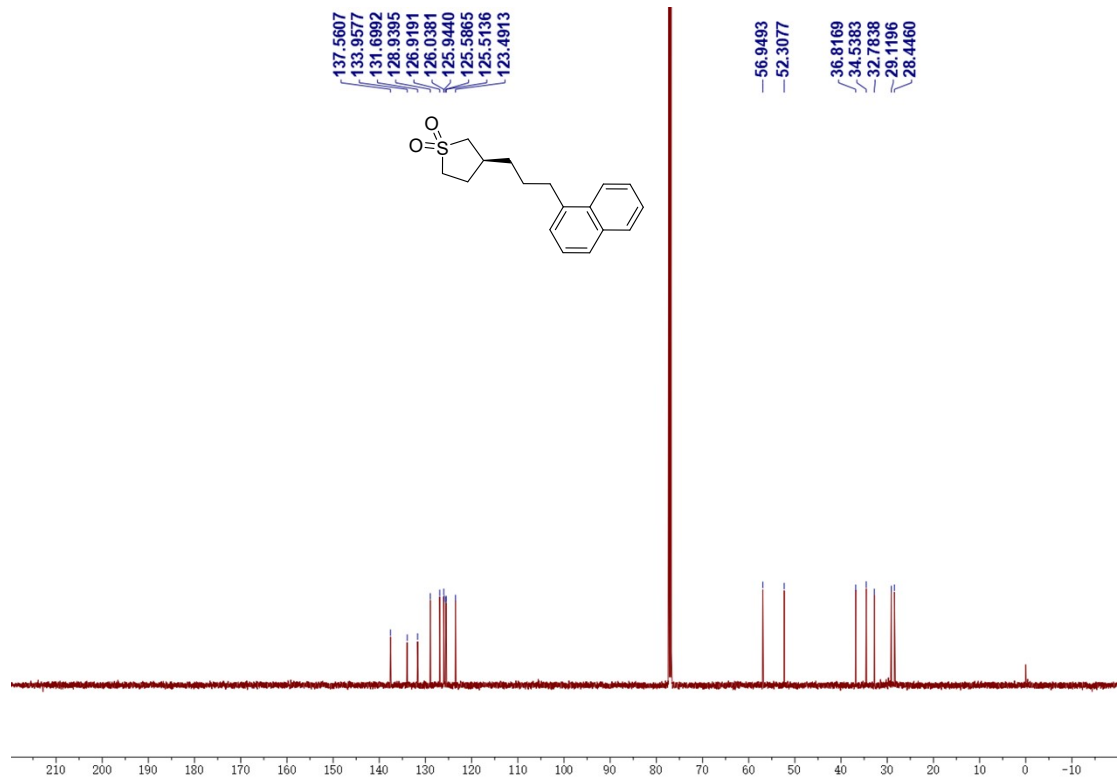

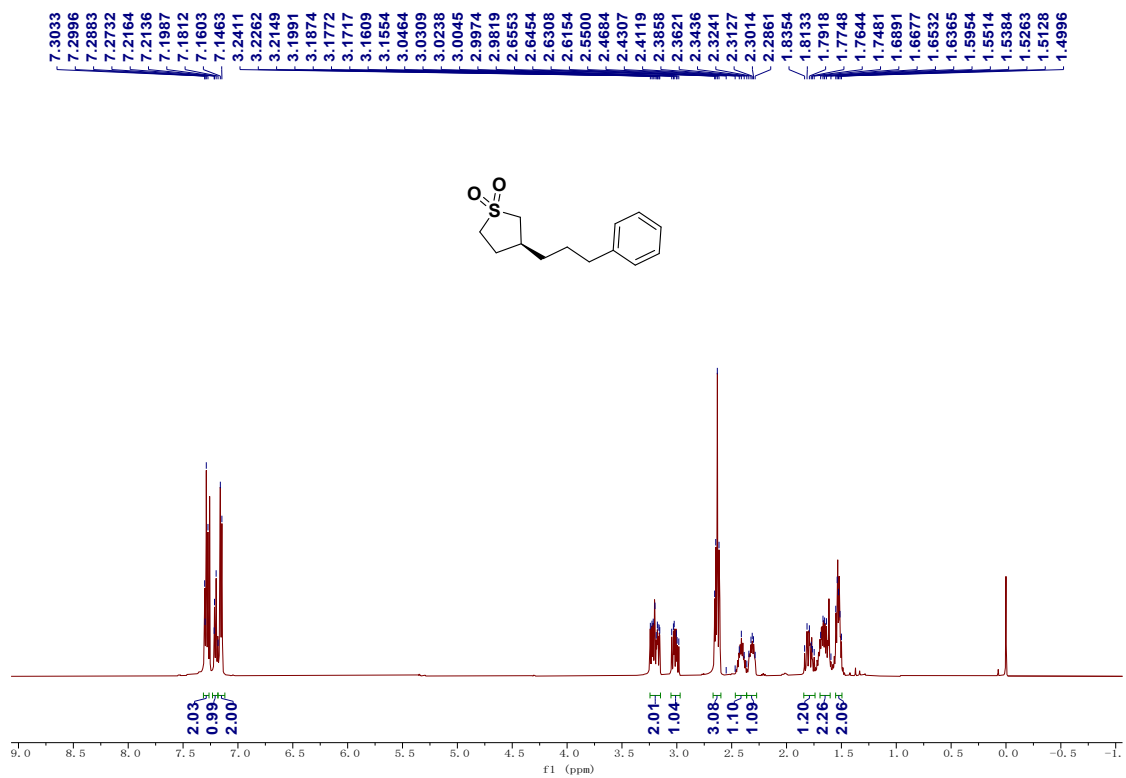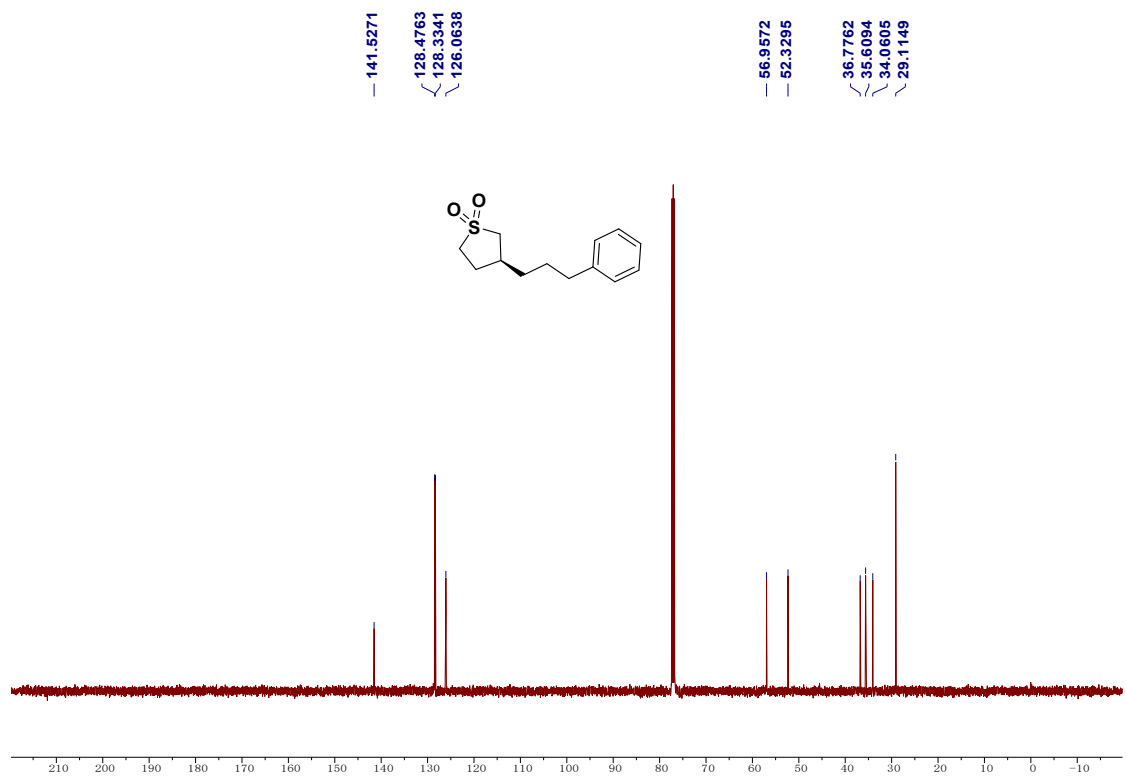

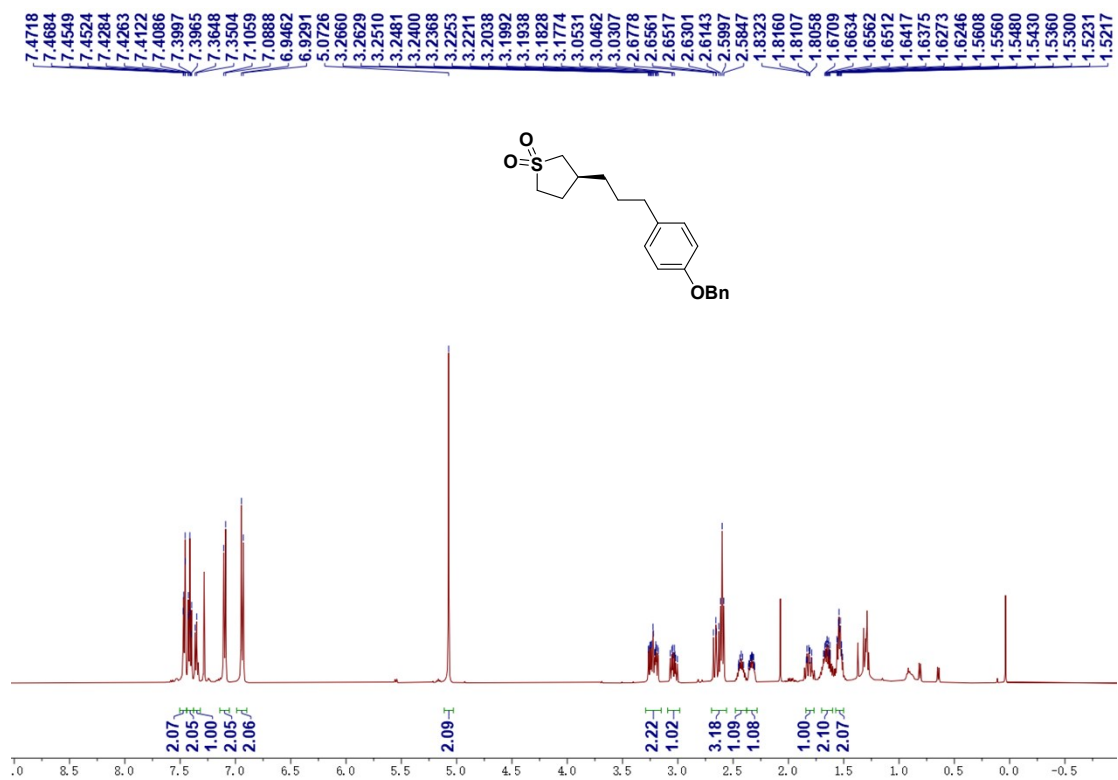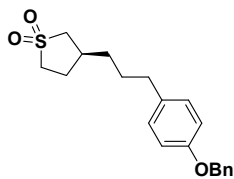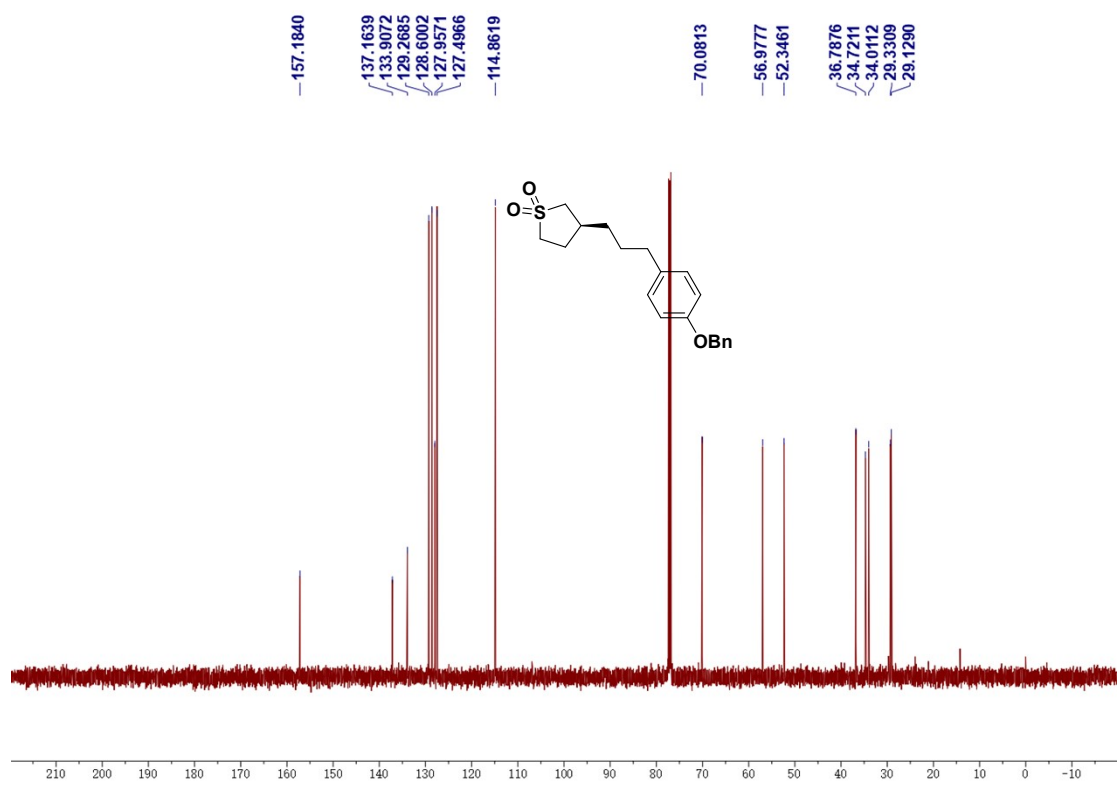

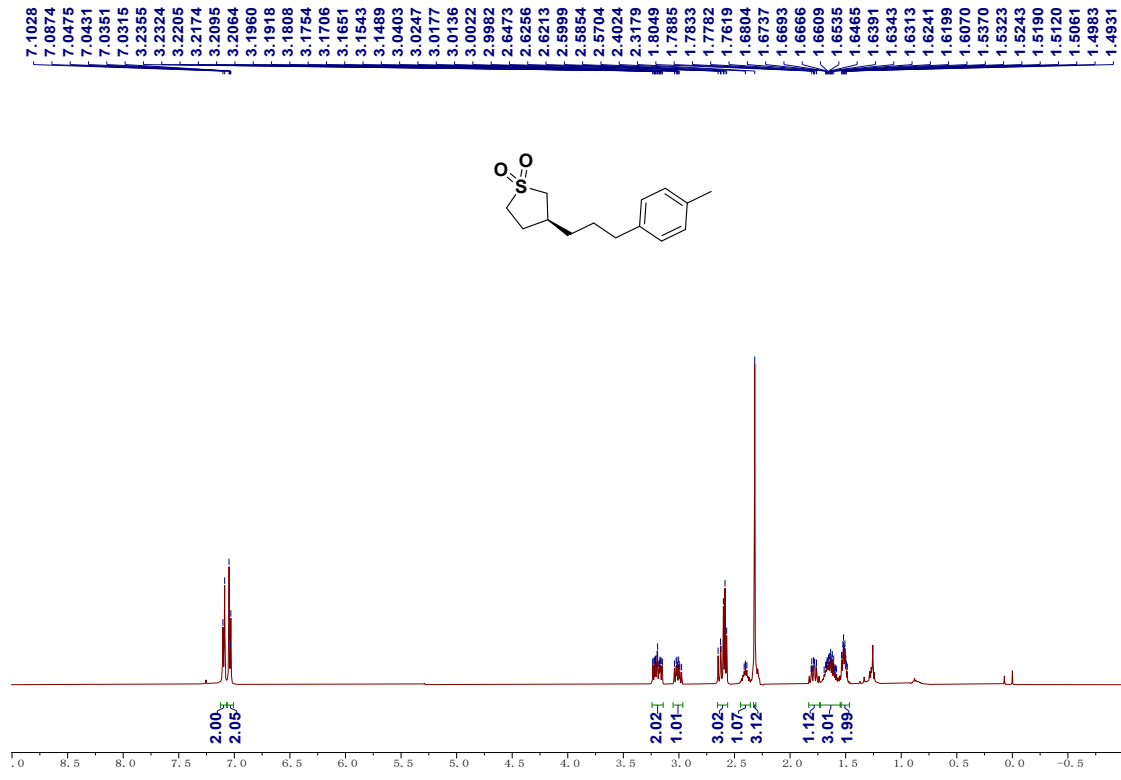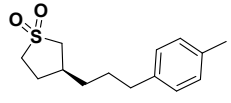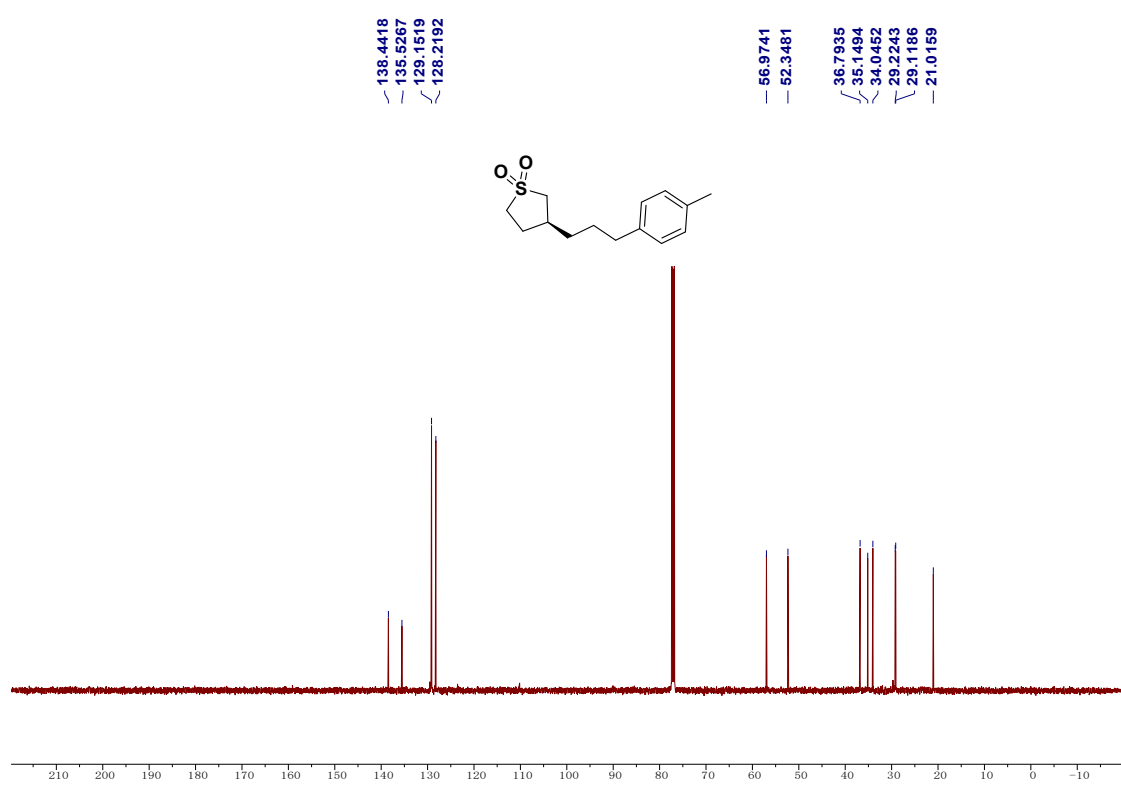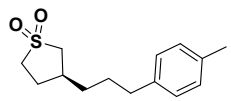

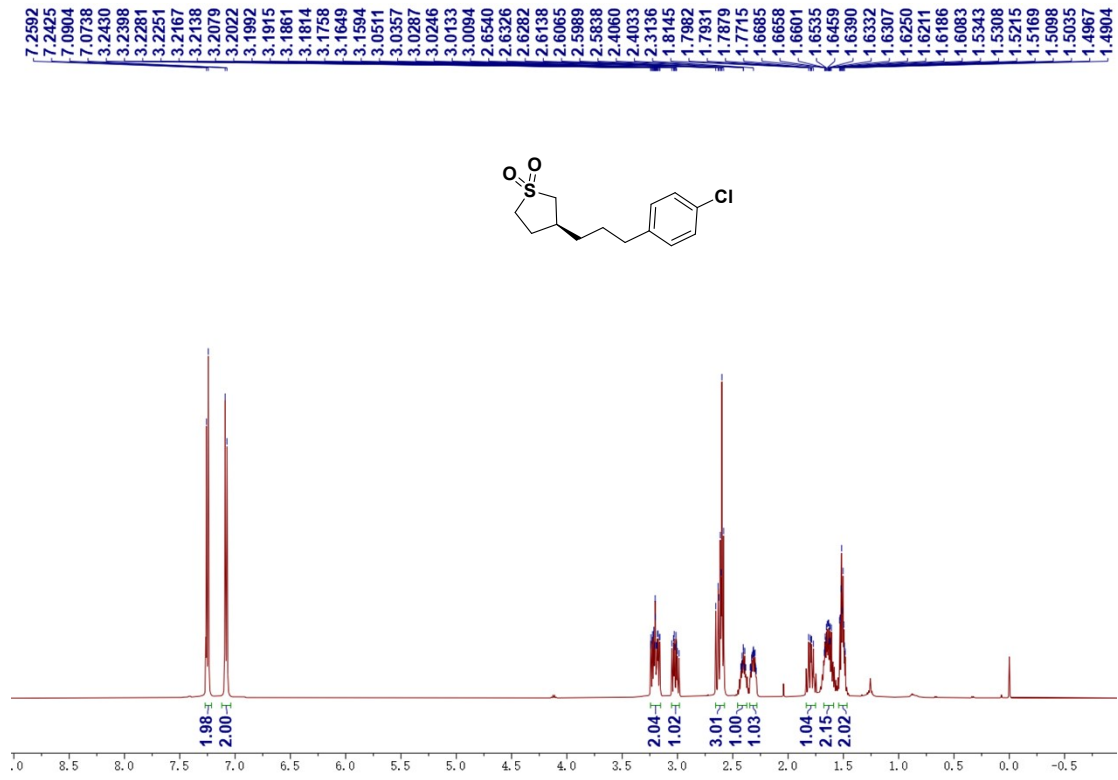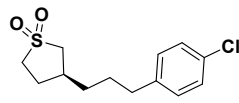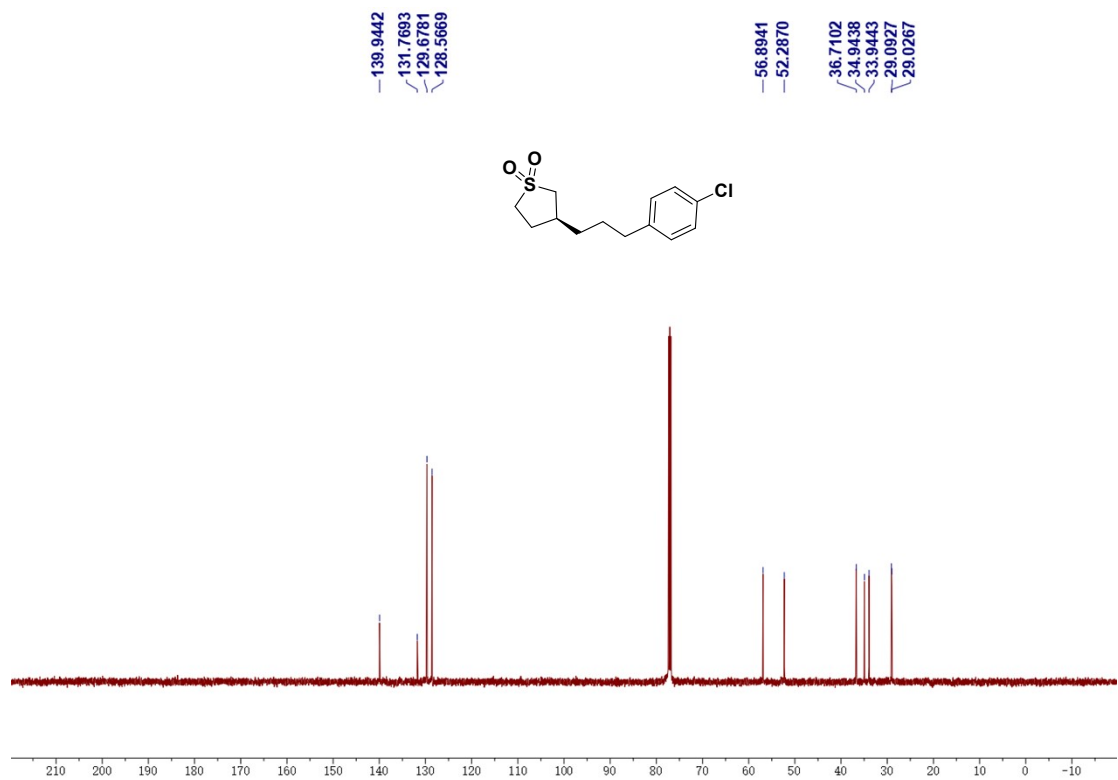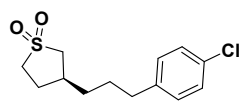

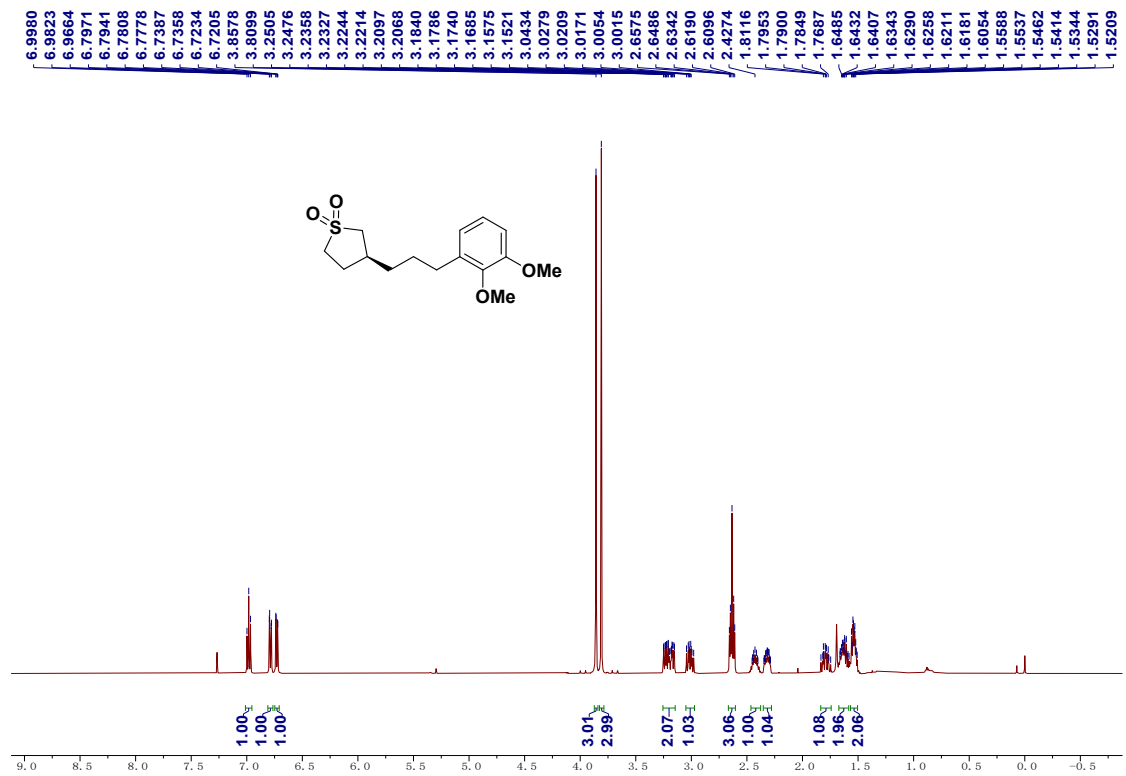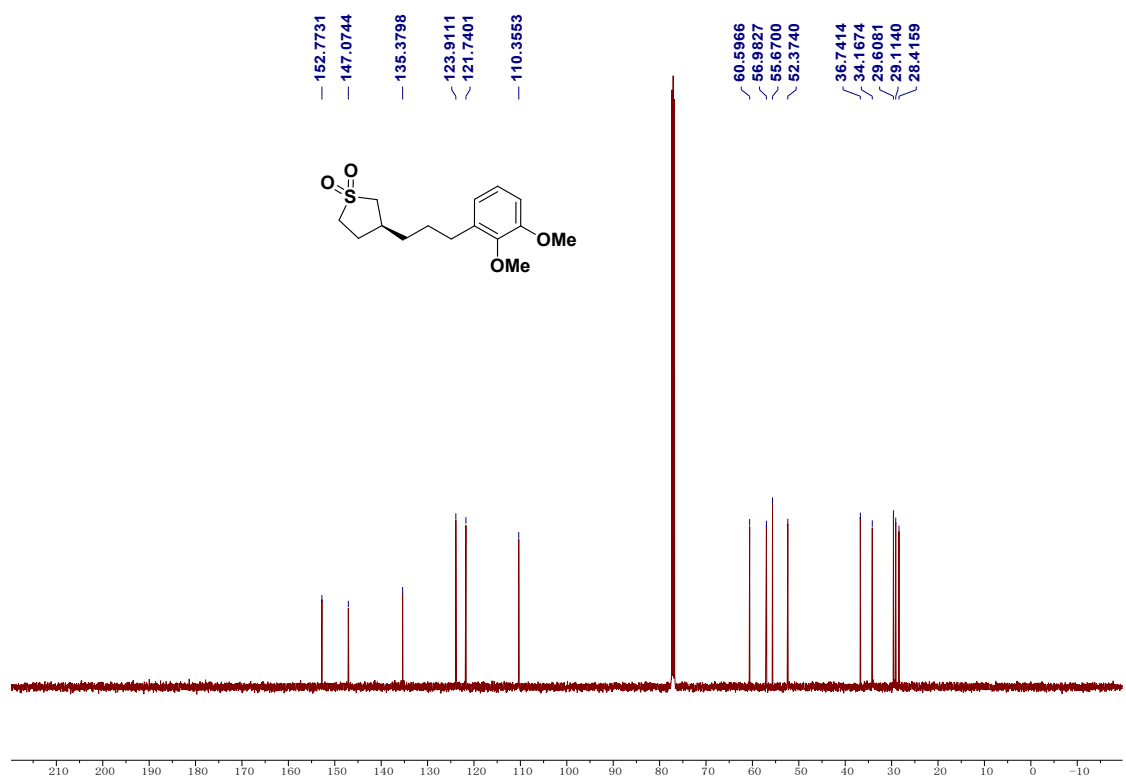

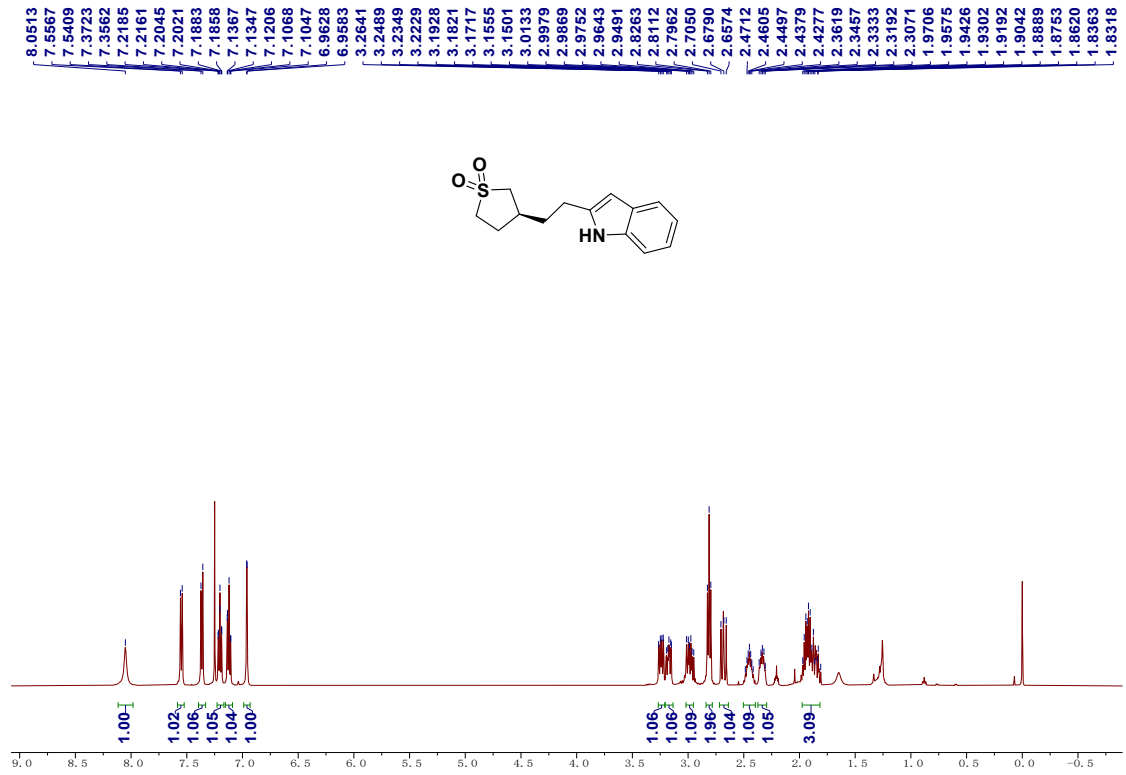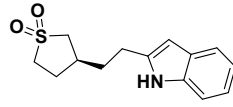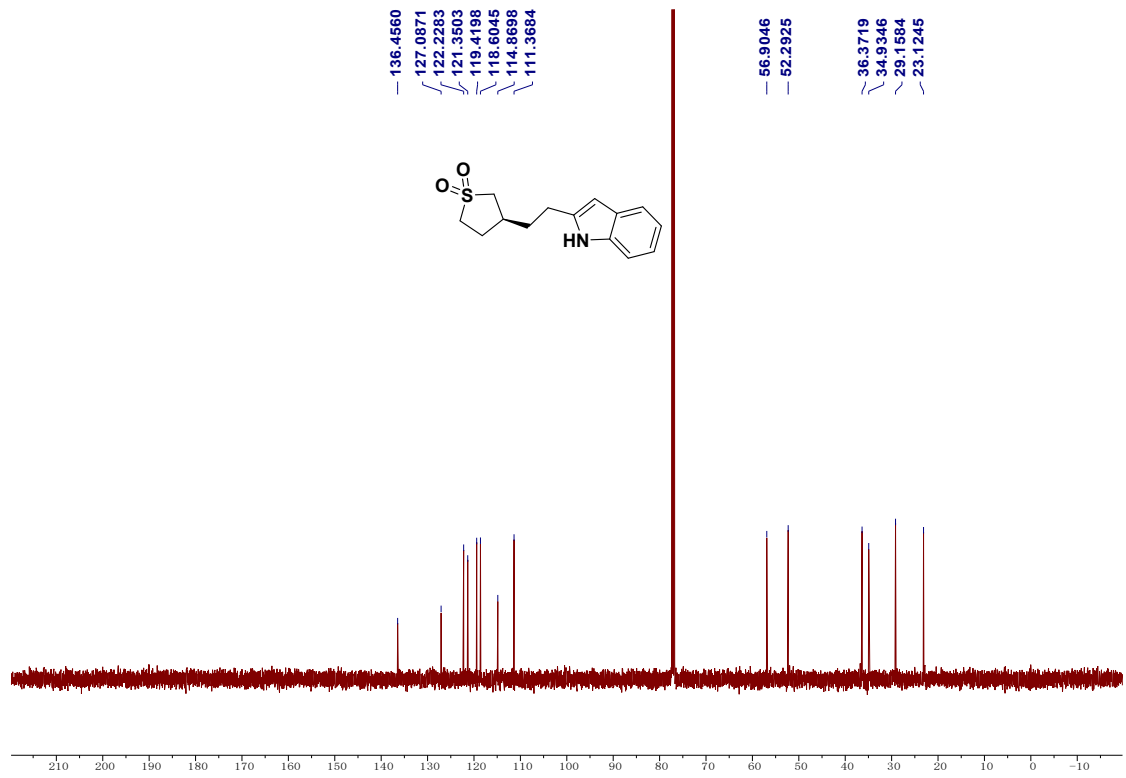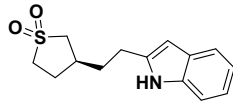

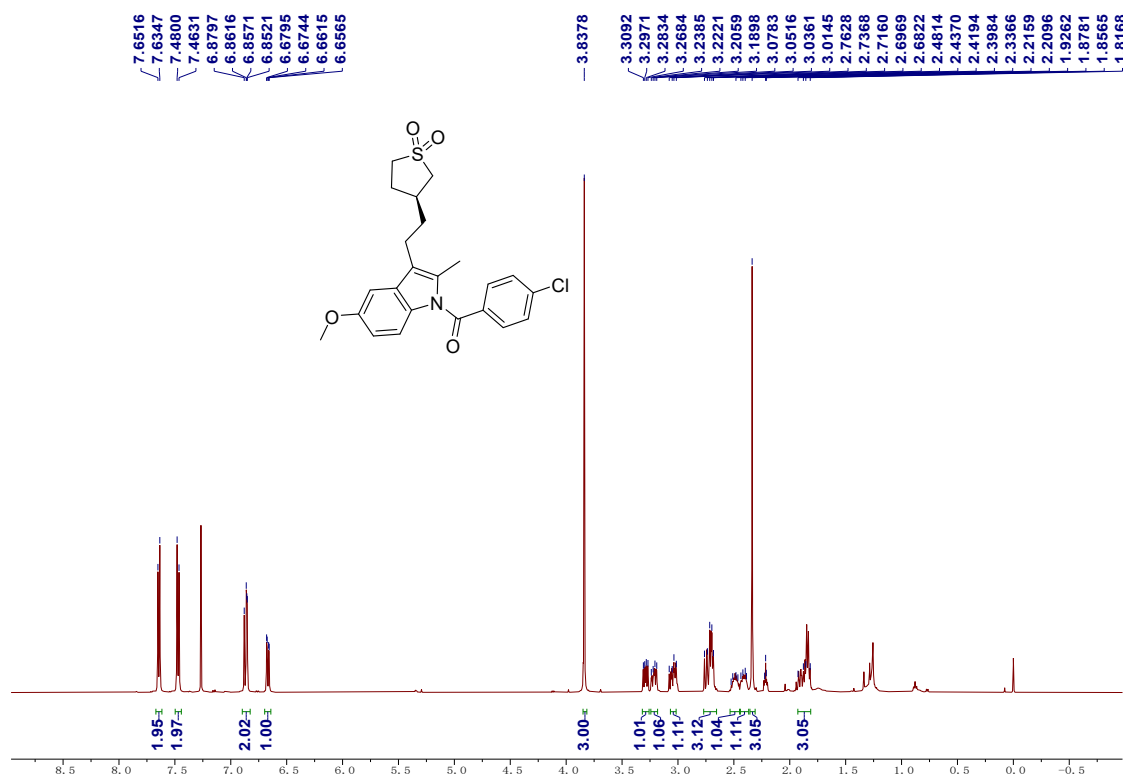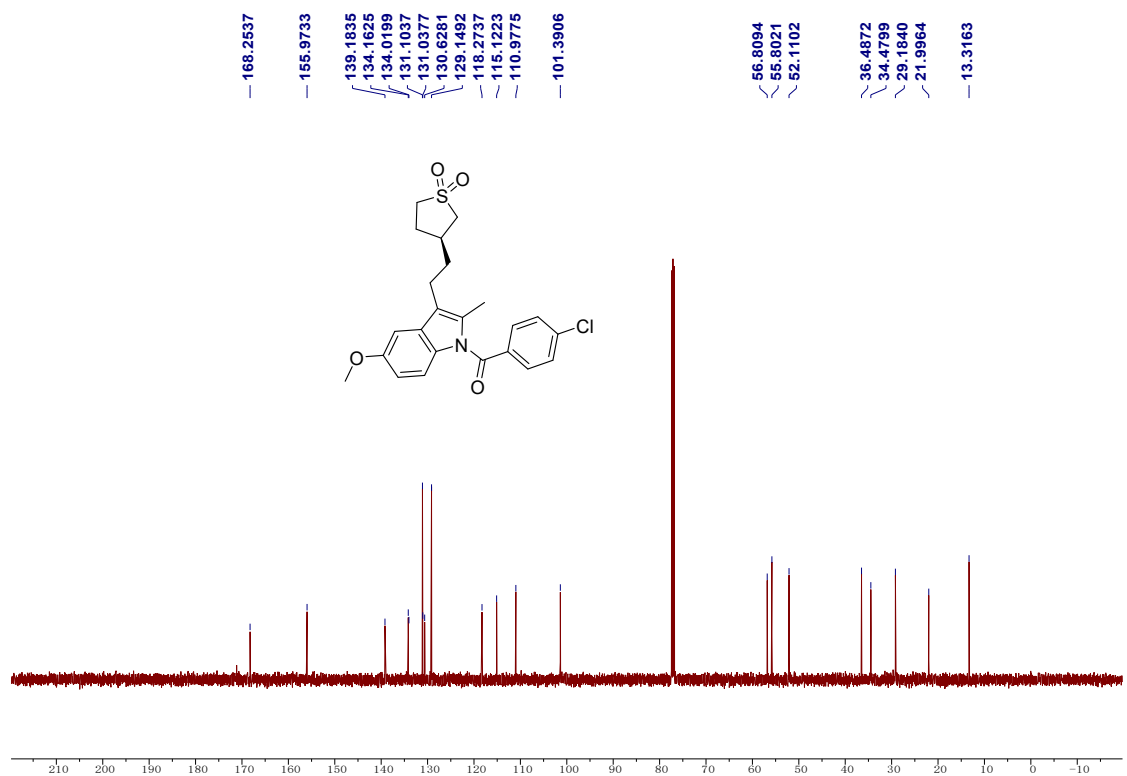



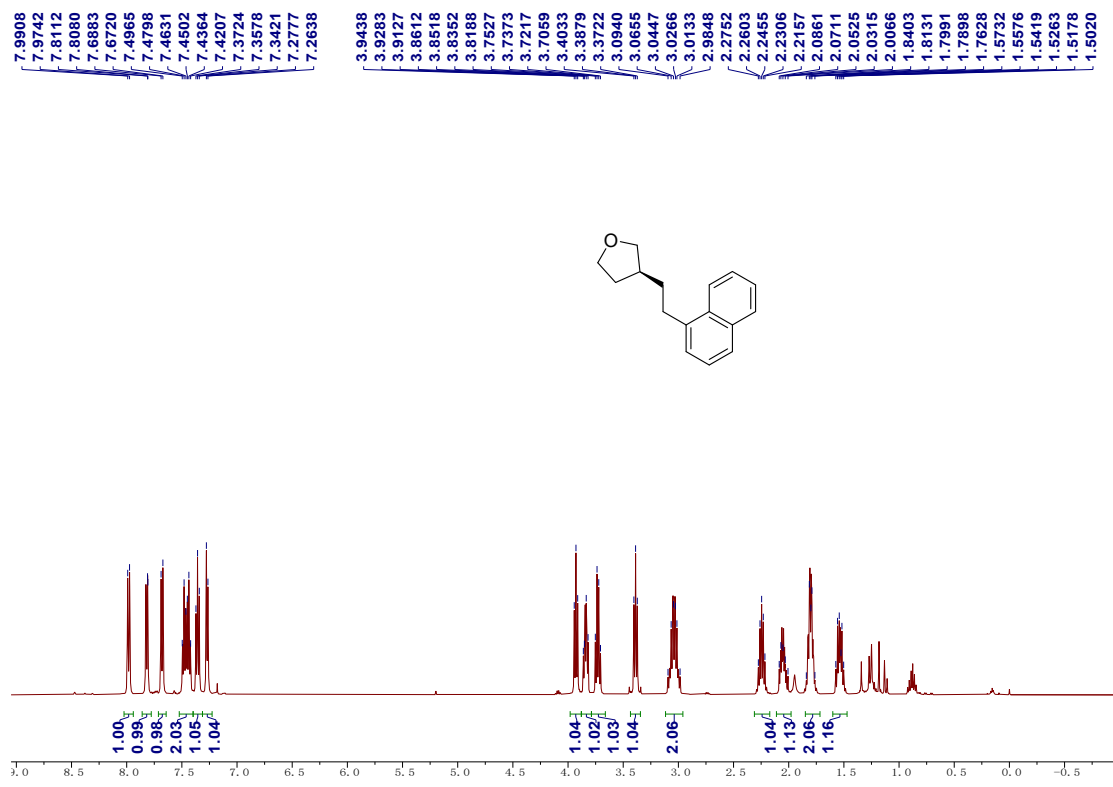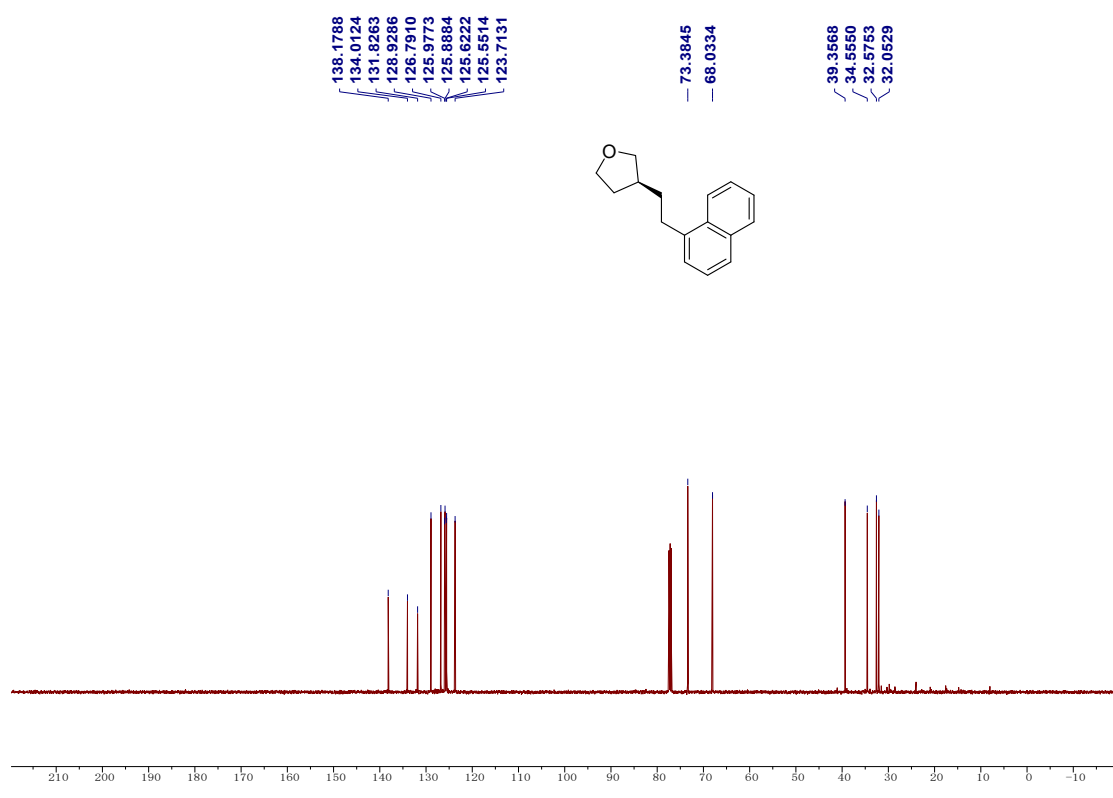

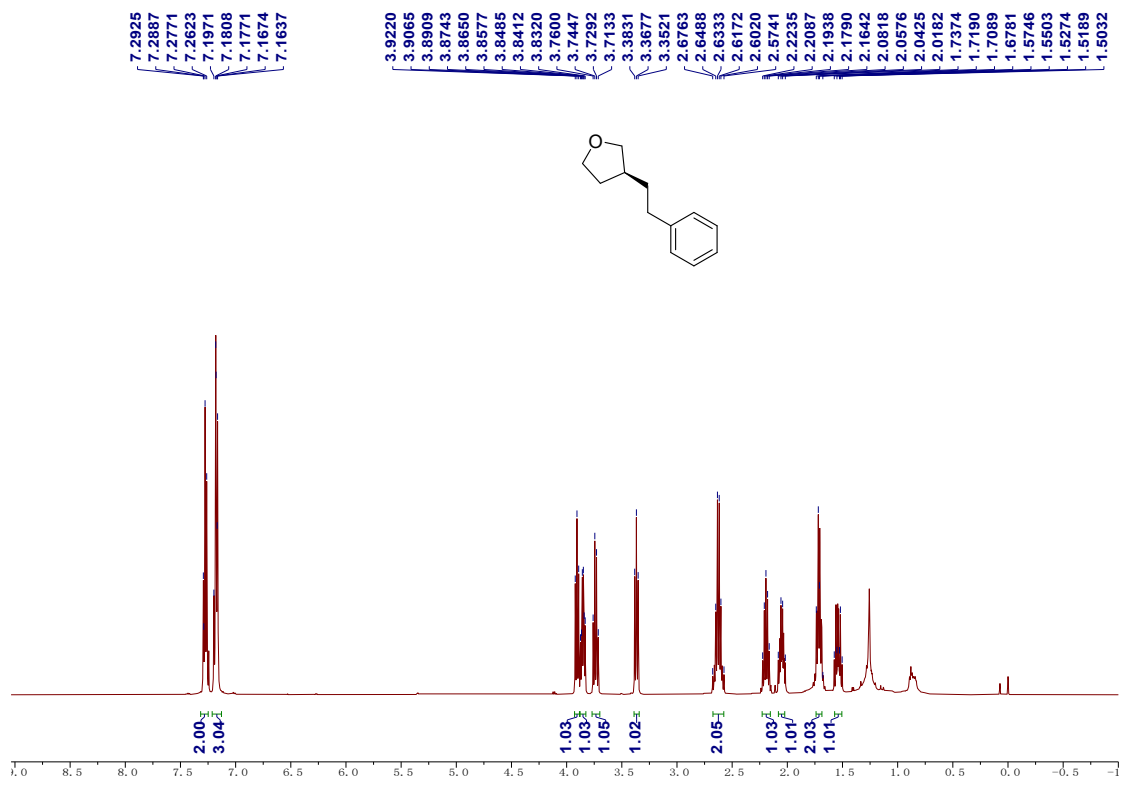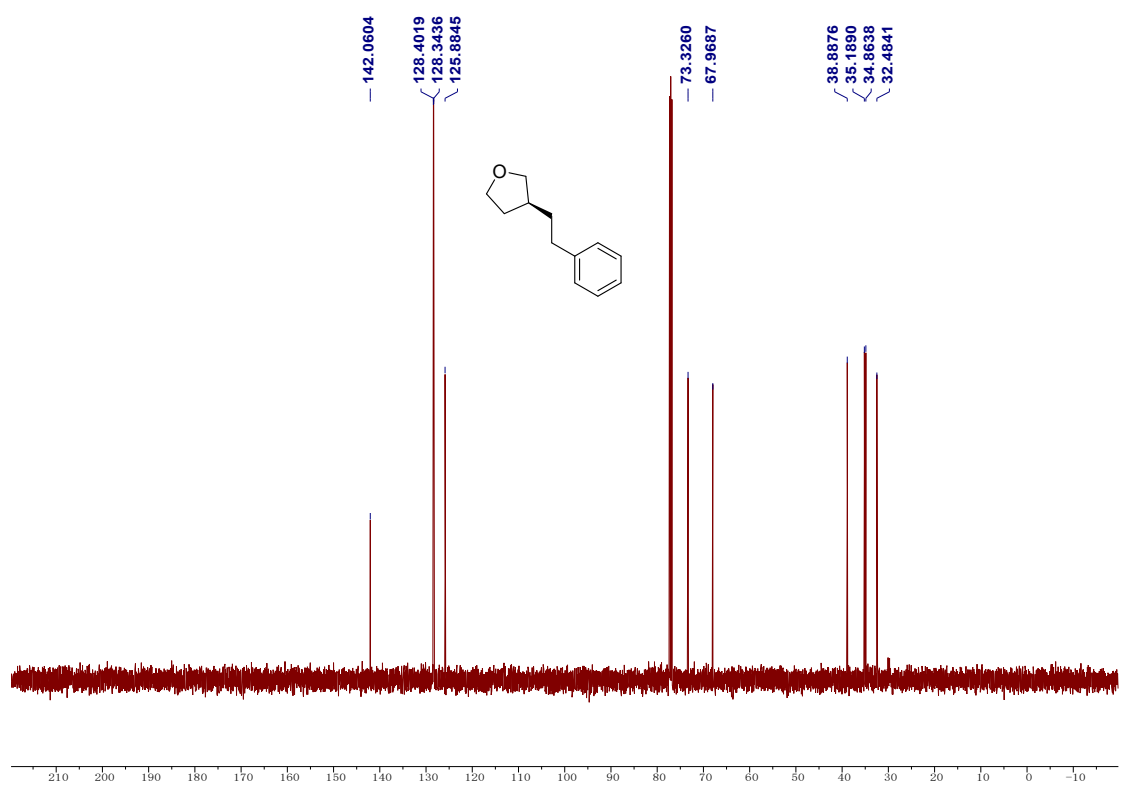

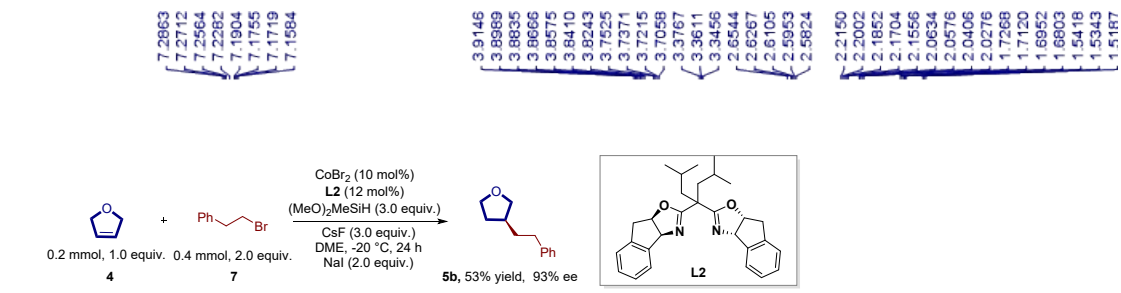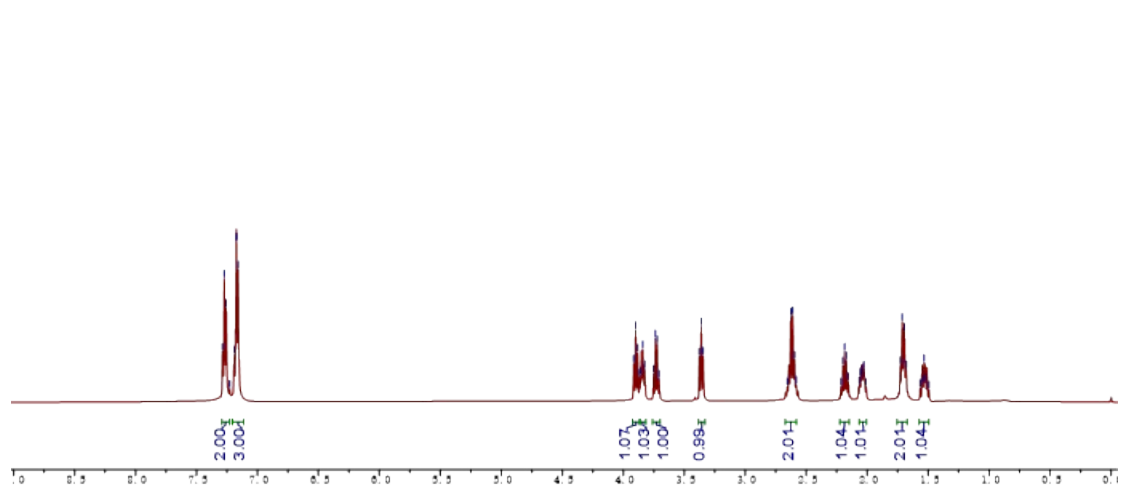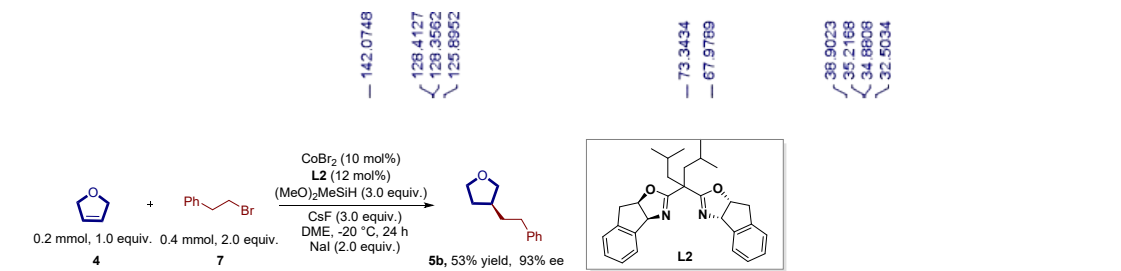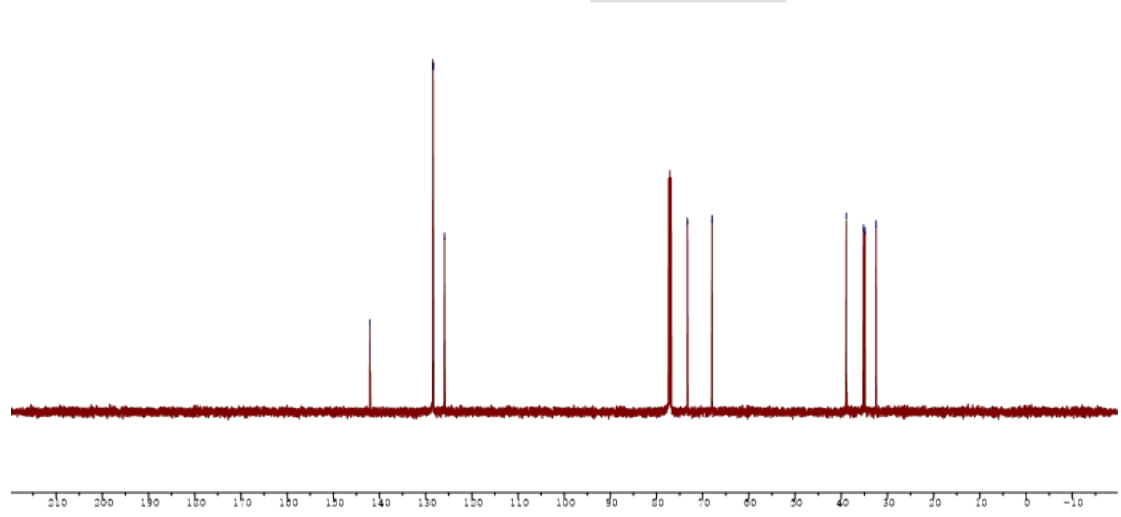

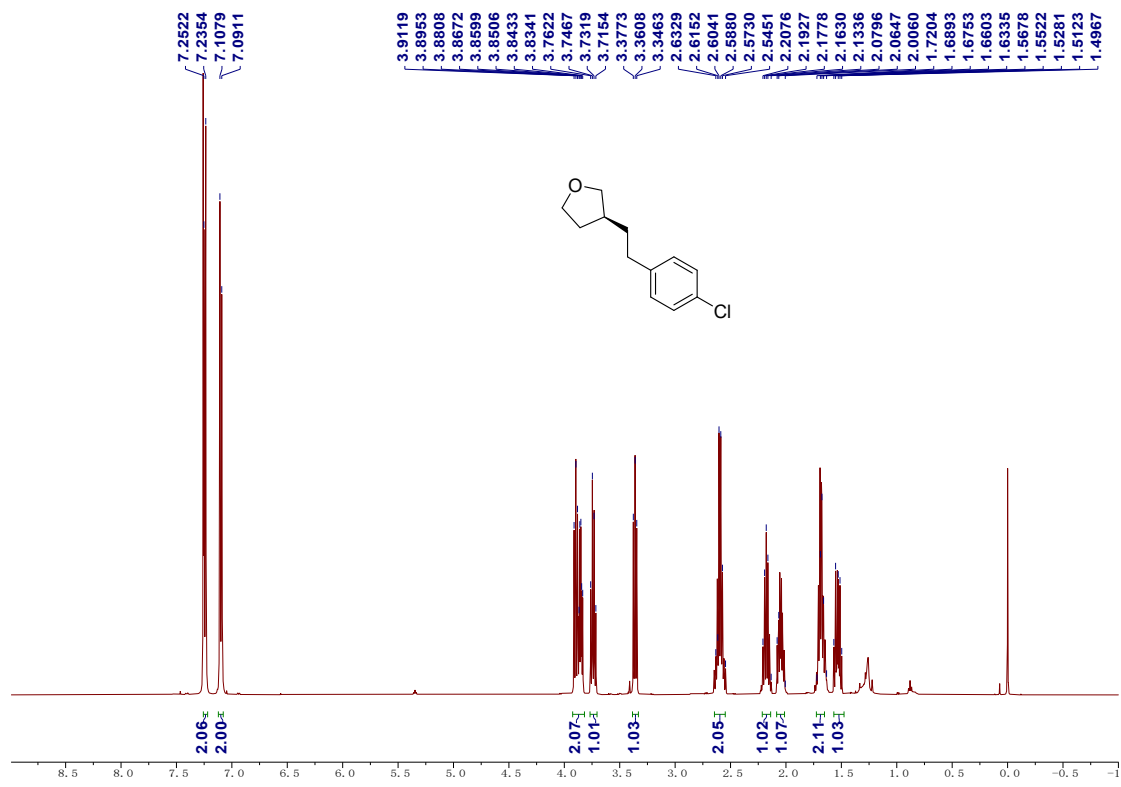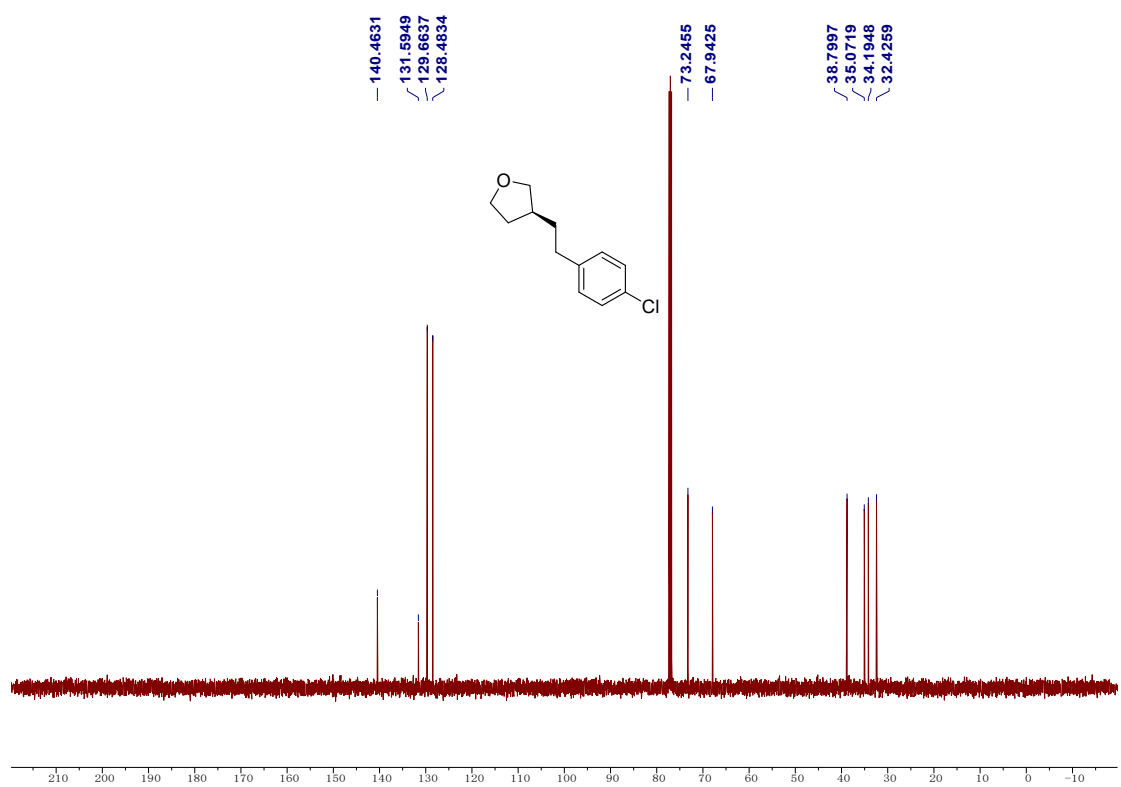

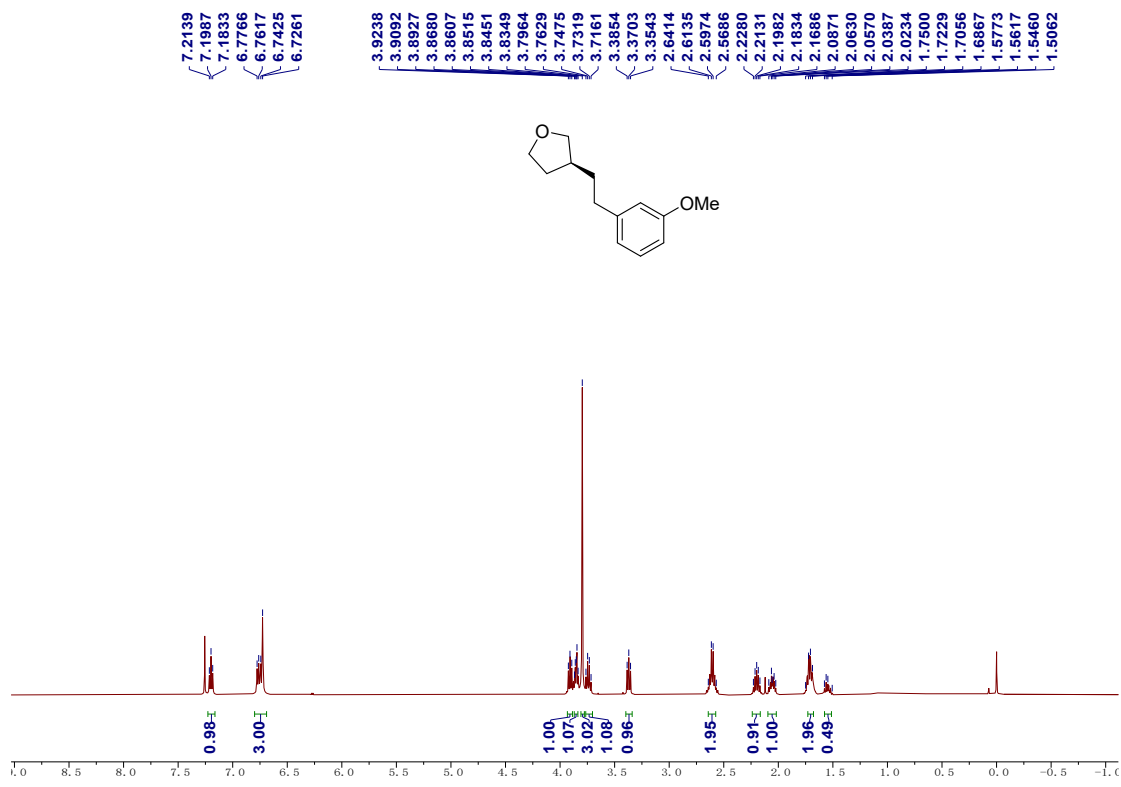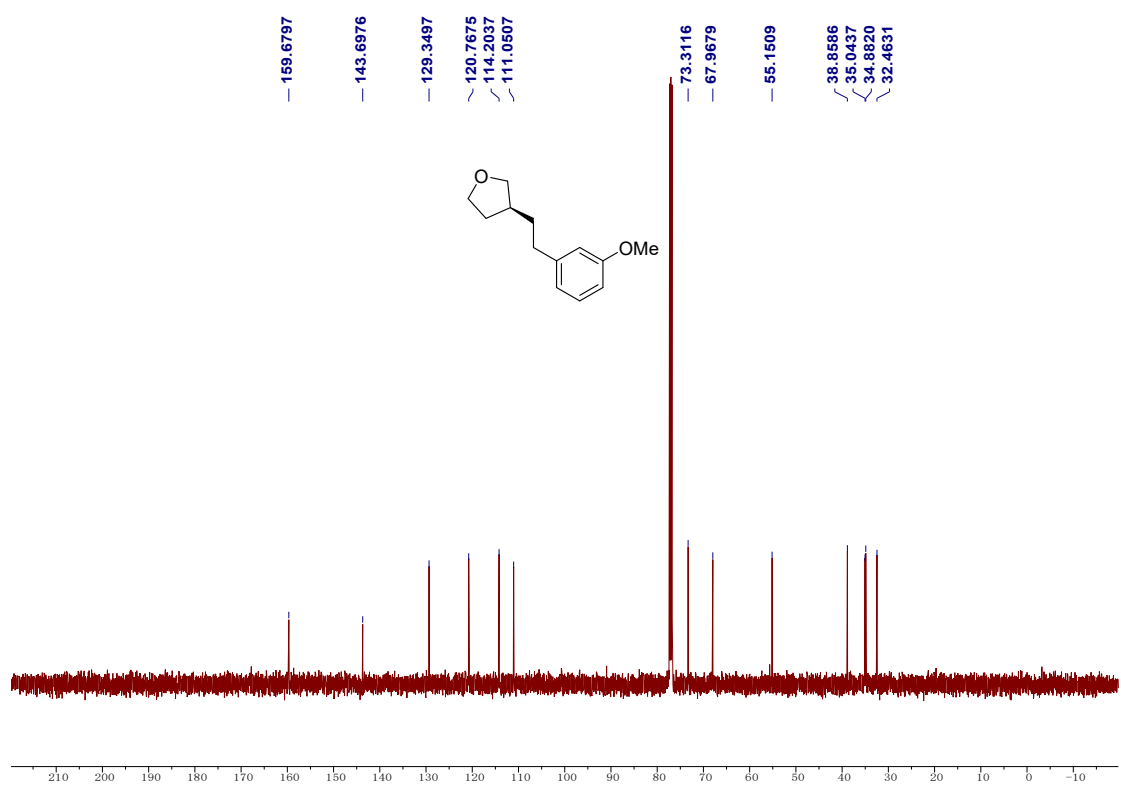

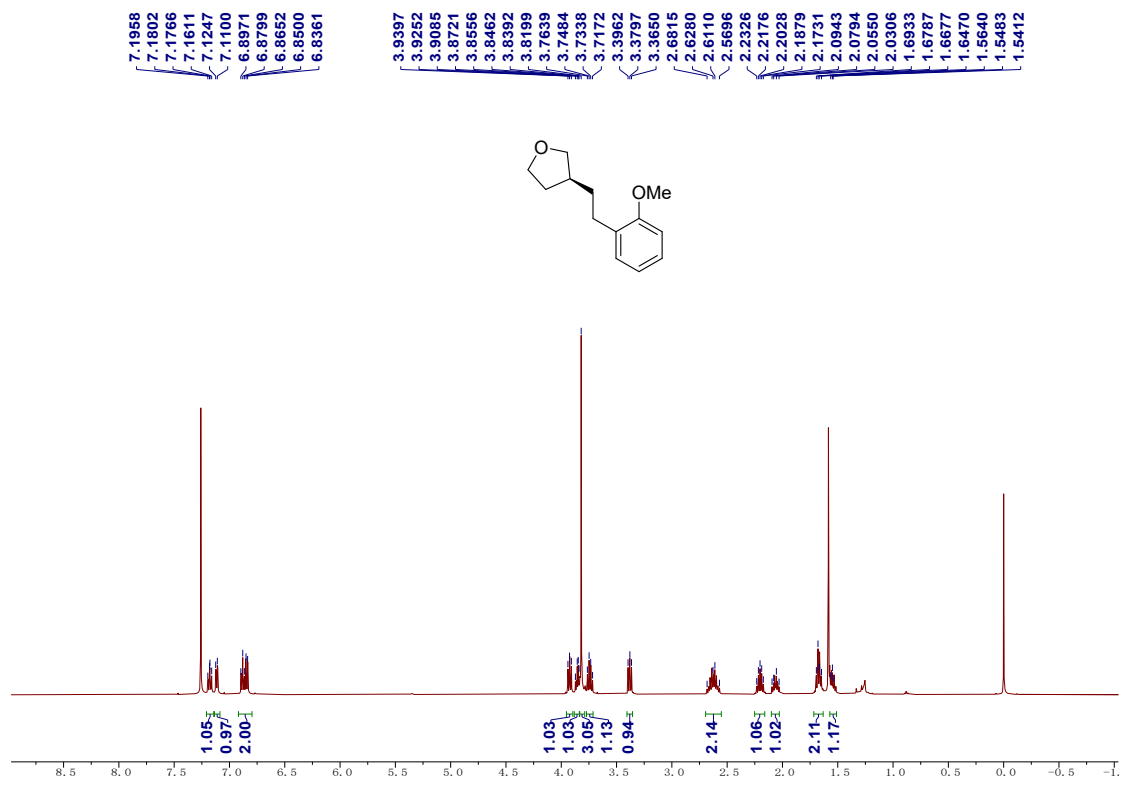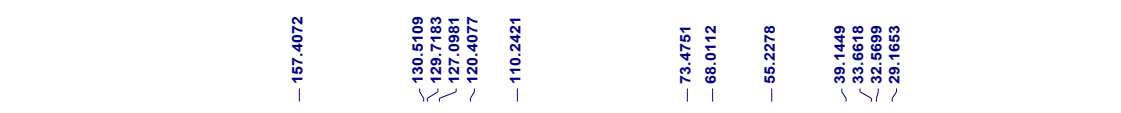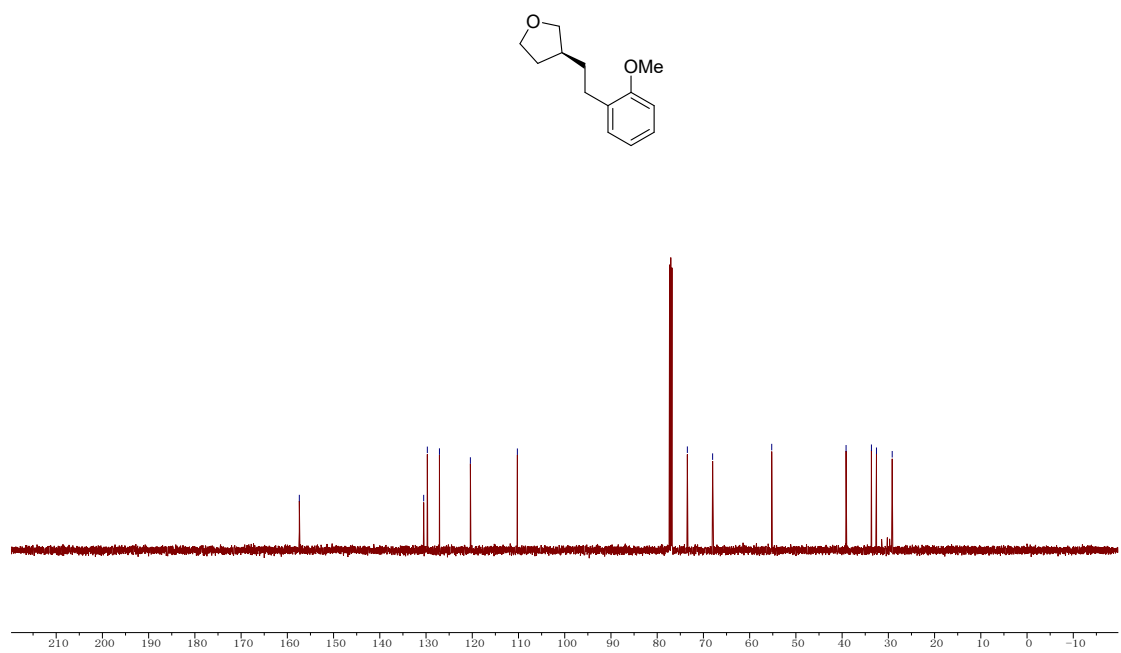

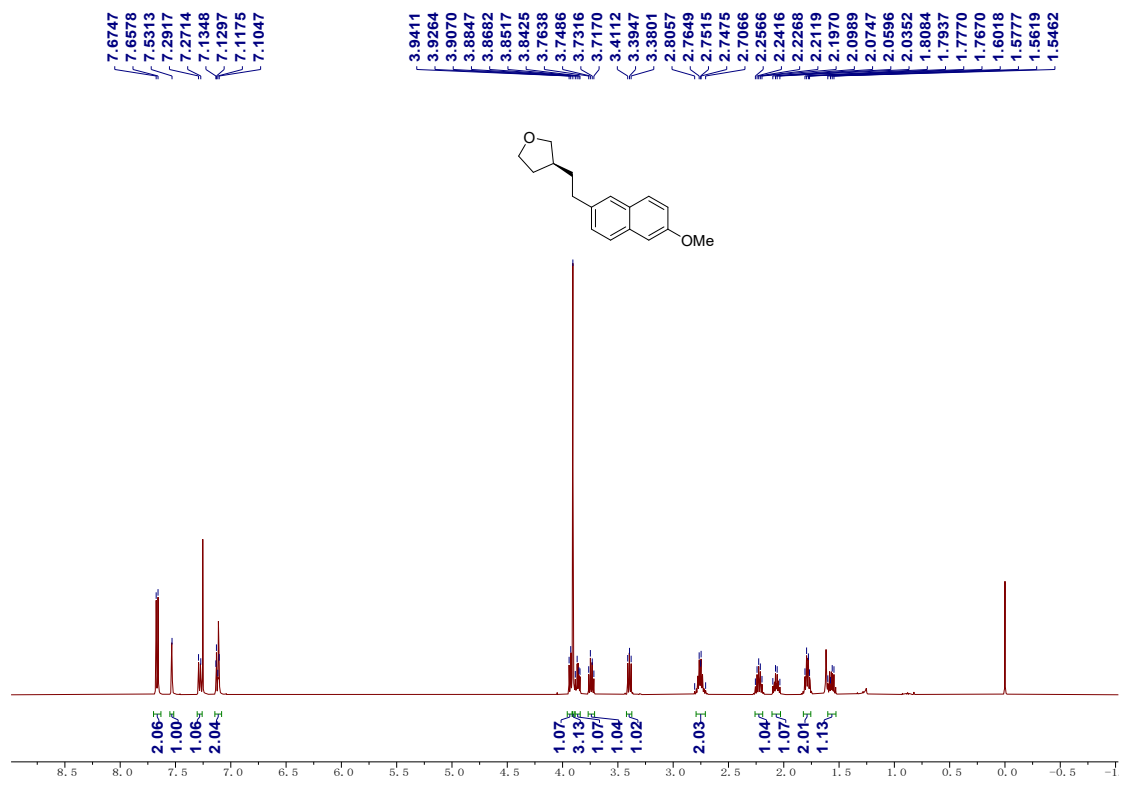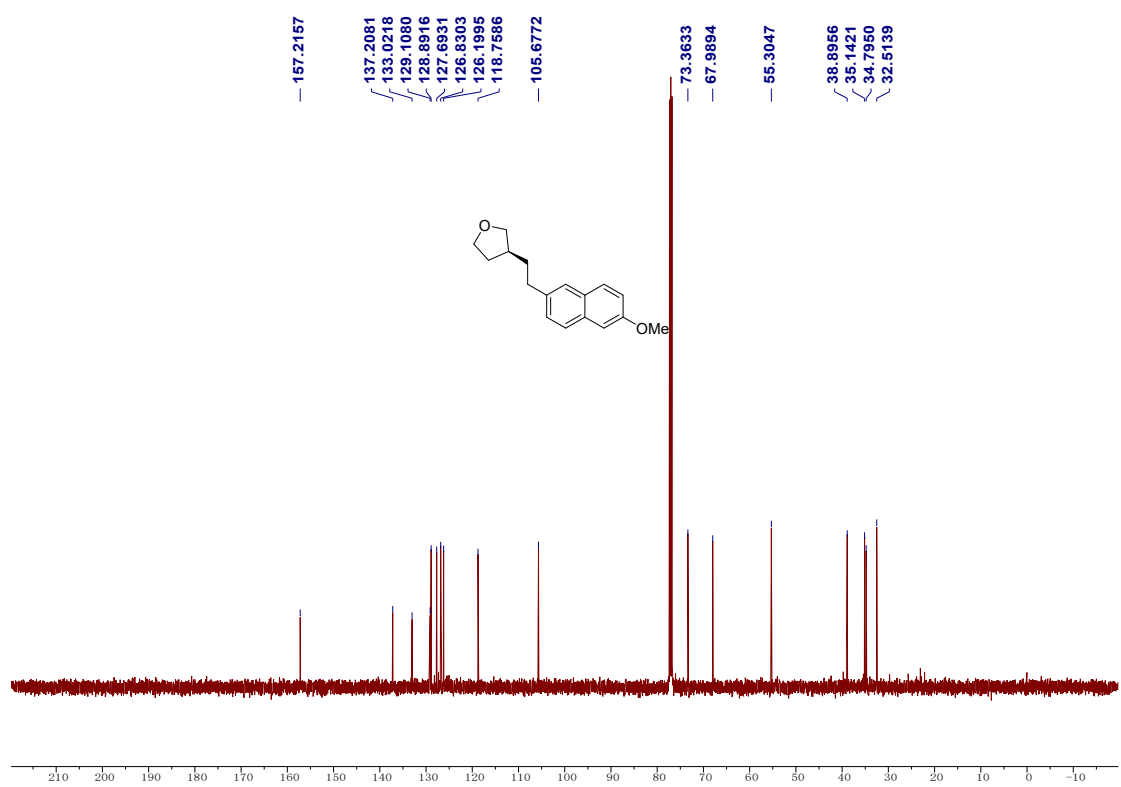

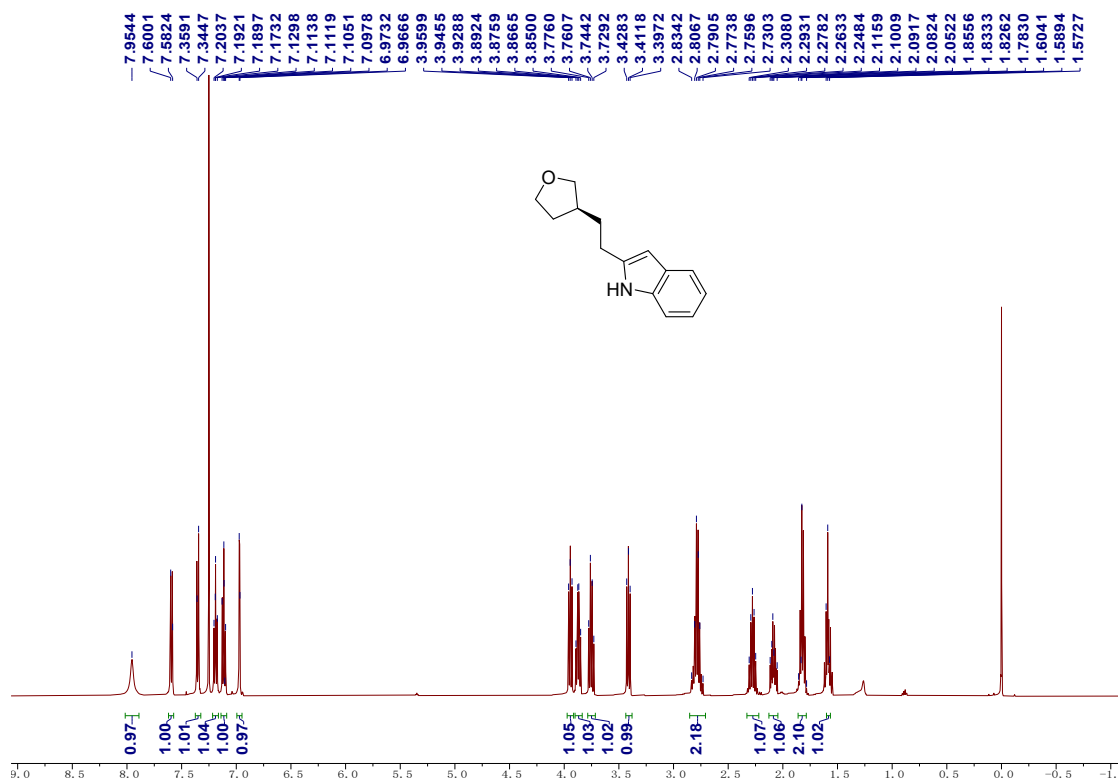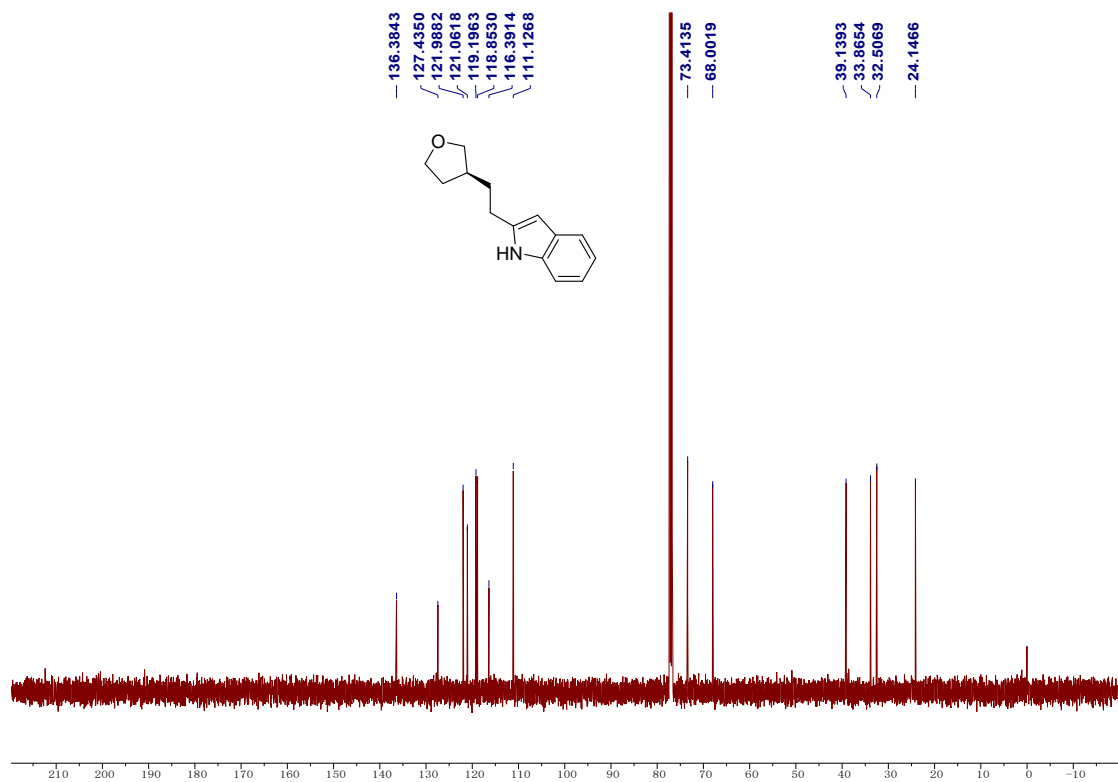



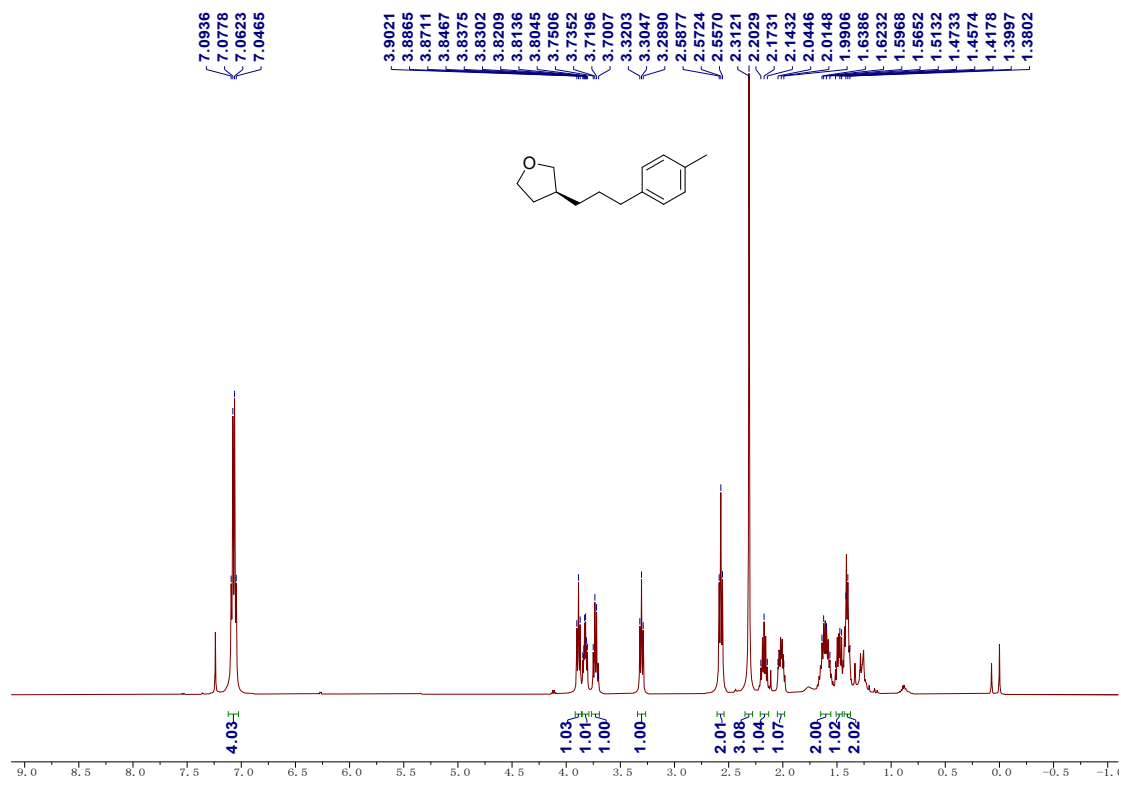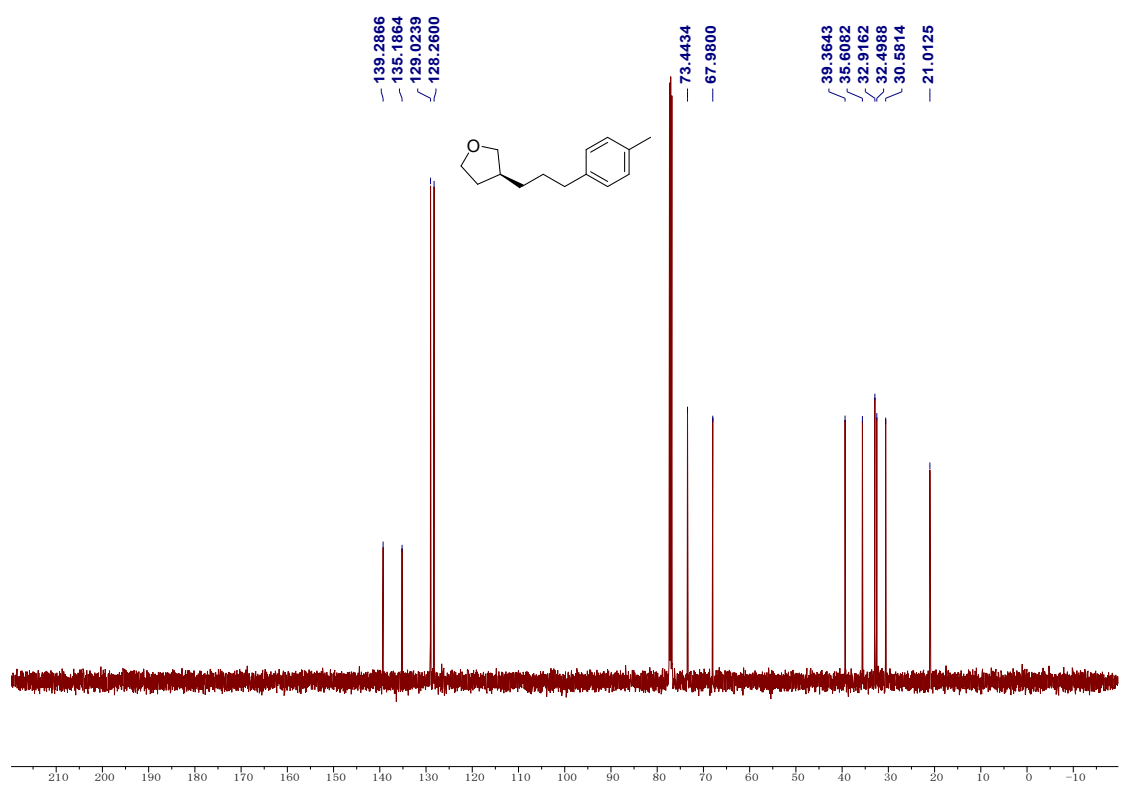

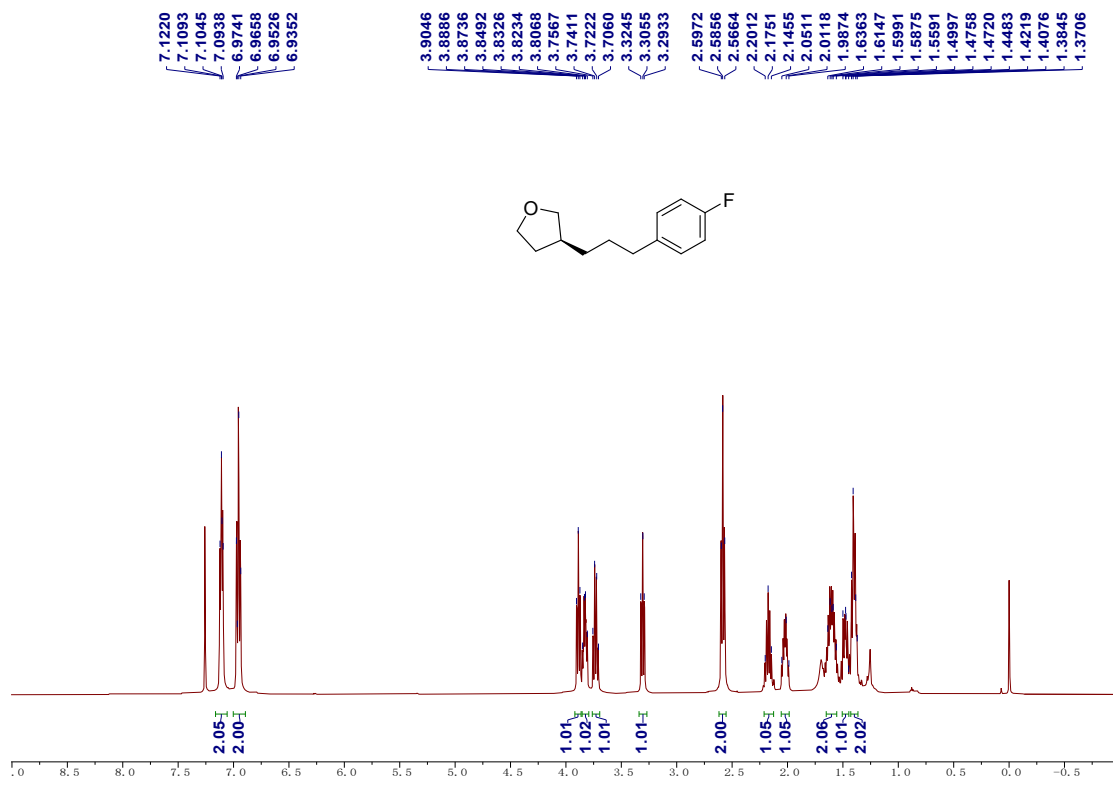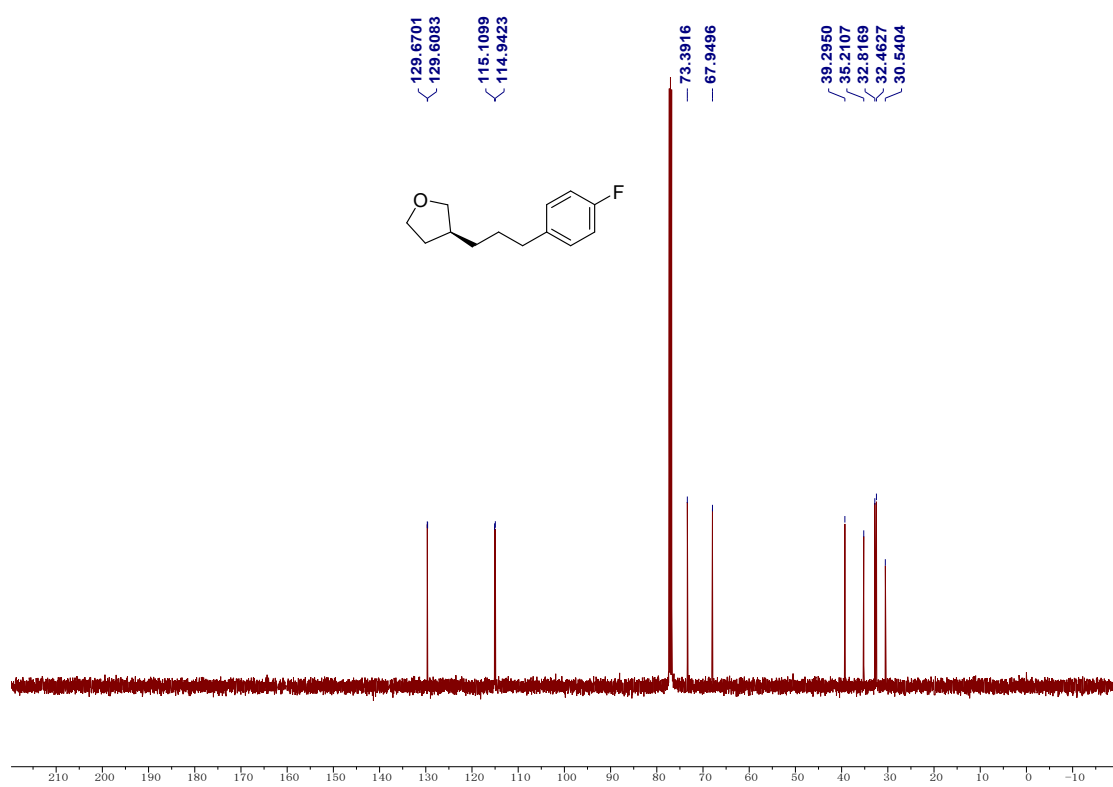

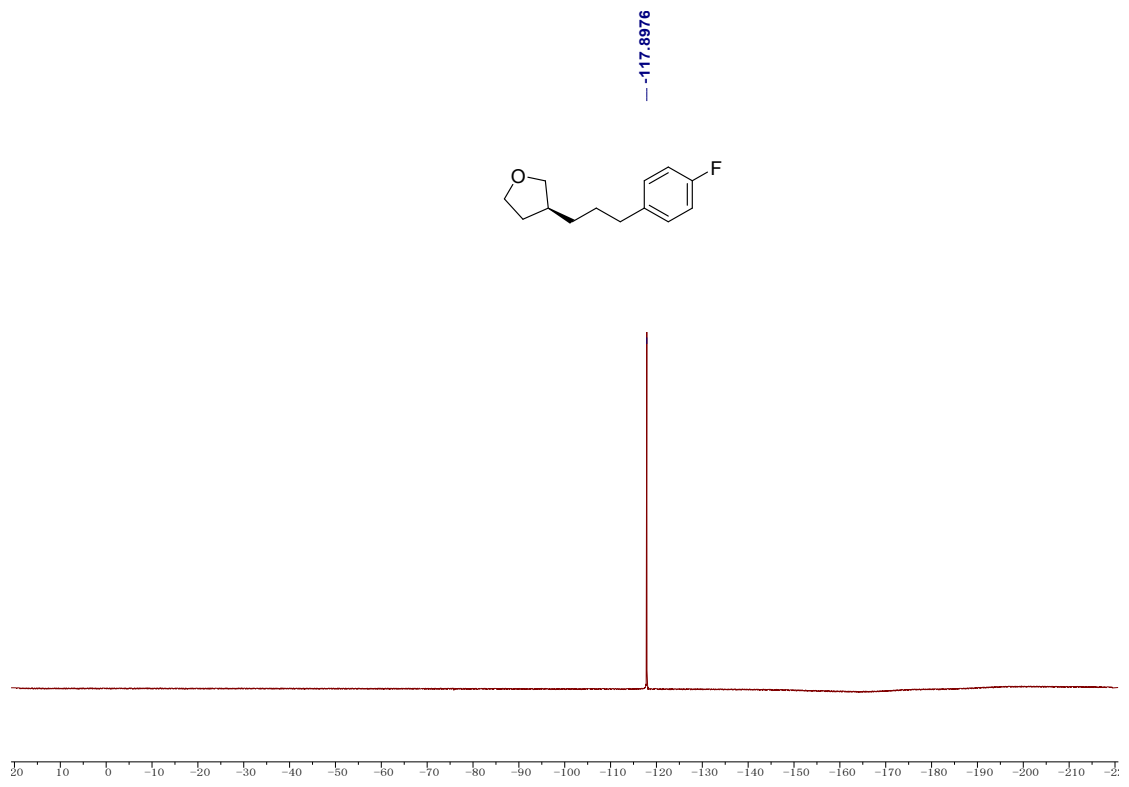

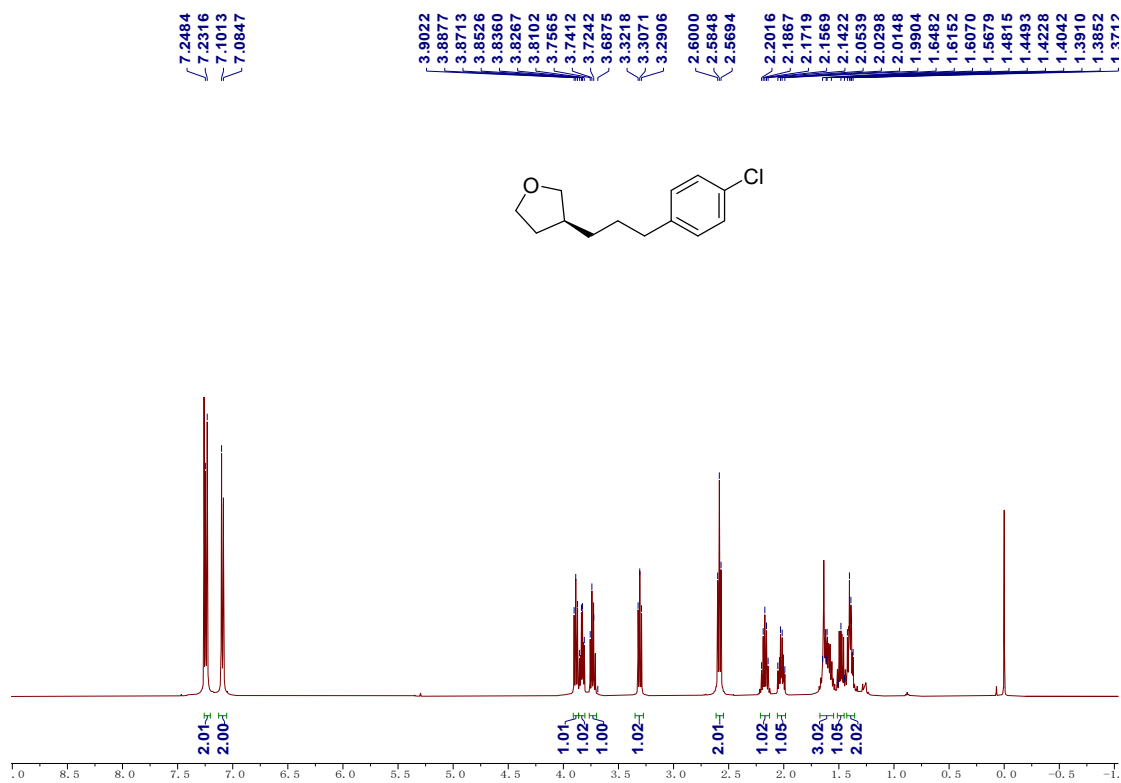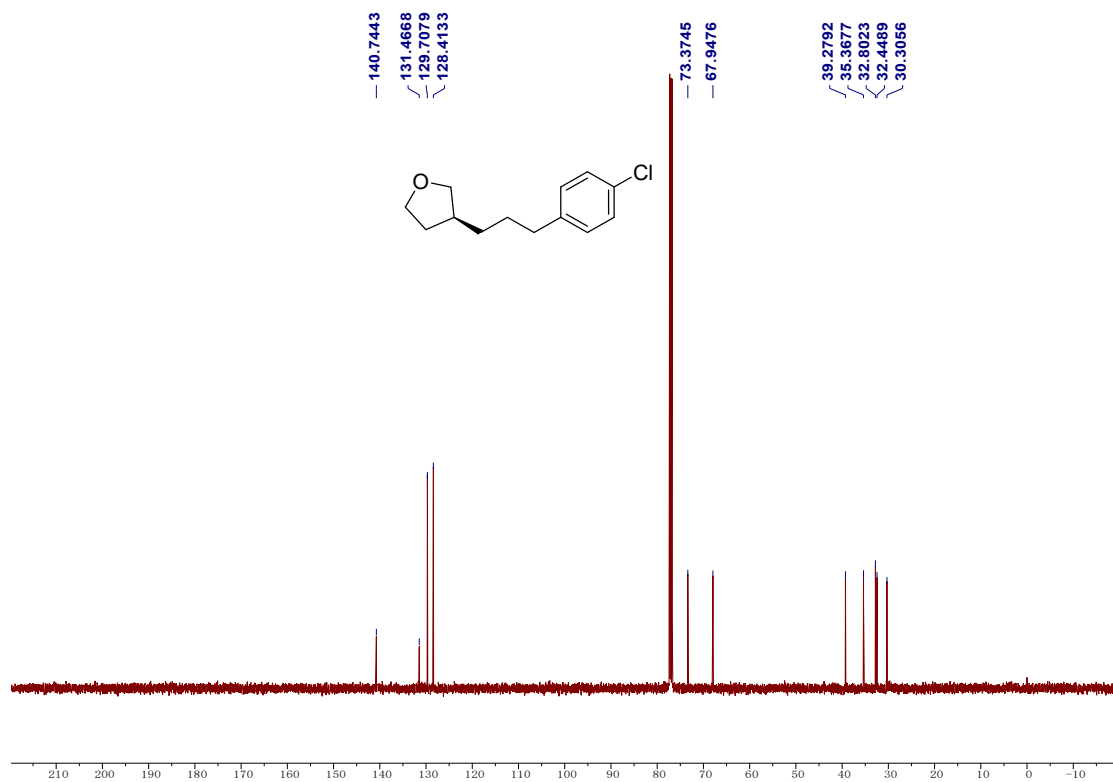

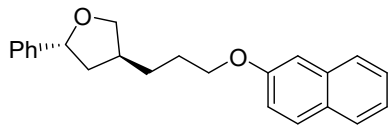

7.7641  
7.7368  
7.7008  
7.4406  
7.4257  
7.4104  
7.3380  
7.3281  
7.3086  
7.2619  
7.2467  
7.2332  
7.1284  
7.1112  
5.0519  
5.0382  
5.0246  
4.2982  
4.2828  
4.2673  
4.0938  
4.0812  
4.0687  
3.5868  
3.5630  
3.5670  
2.4363  
2.4215  
2.4068  
2.3921  
2.3774  
2.0732  
2.0589  
2.0447  
1.9099  
1.8626  
1.8340  
1.6936  
1.6754  
1.6429

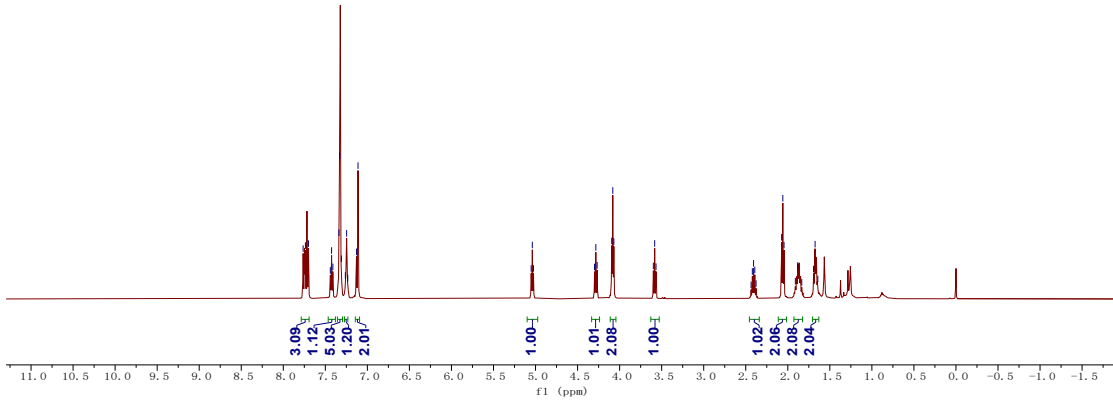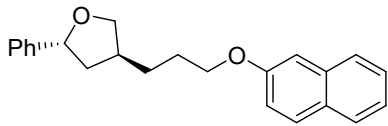

156.9423  
143.8242  
134.6057  
129.4166  
128.5696  
128.3334  
127.6757  
127.1058  
126.7189  
126.3745  
125.5331  
123.5888  
118.9387  
106.5853  
80.1214  
74.1826  
67.7832  
40.8584  
38.7239  
28.7530  
28.2192

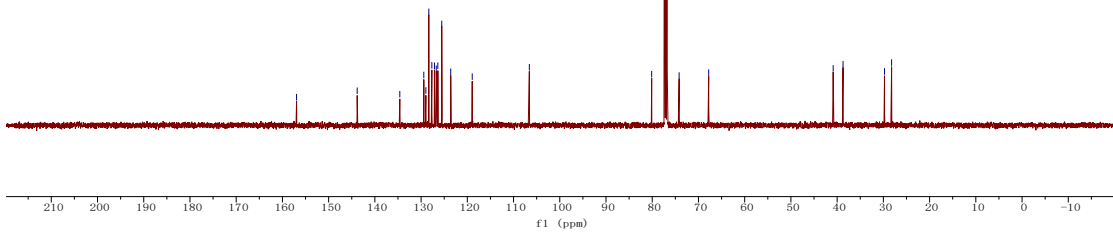

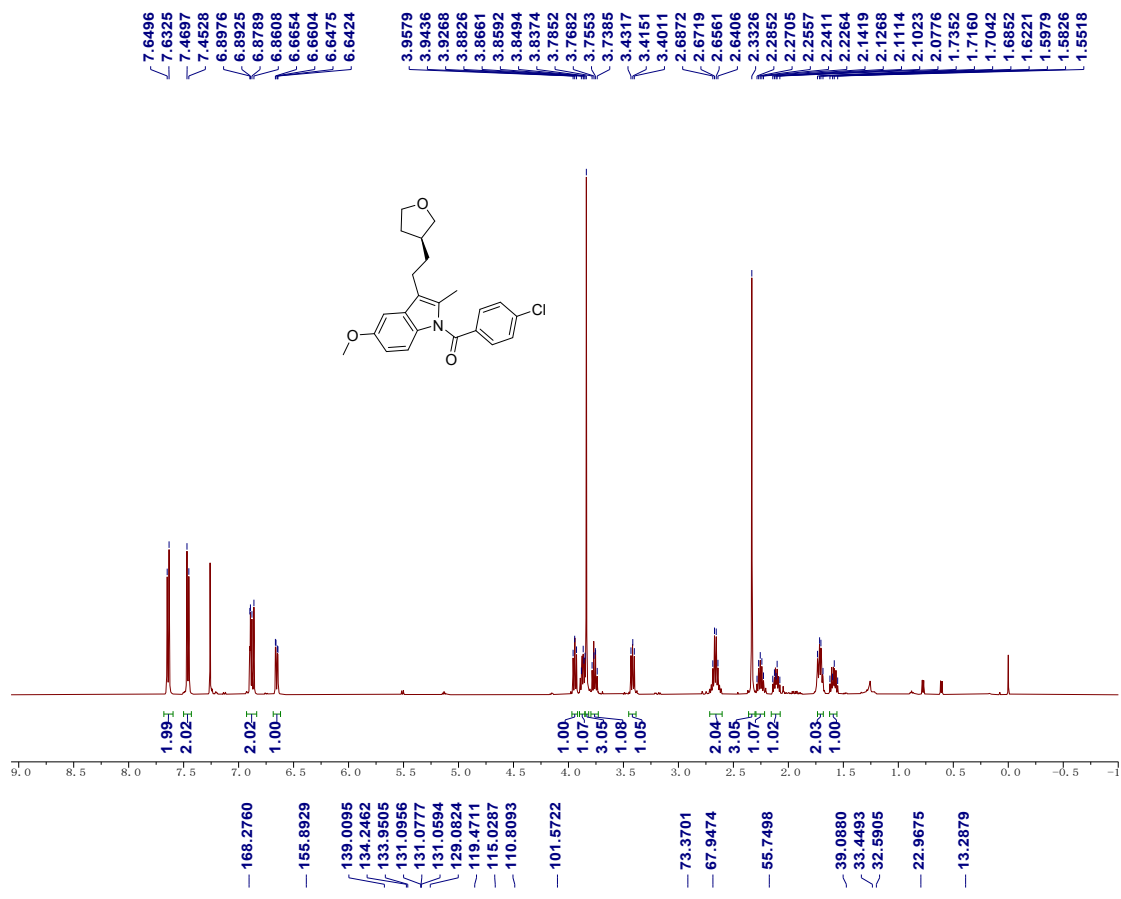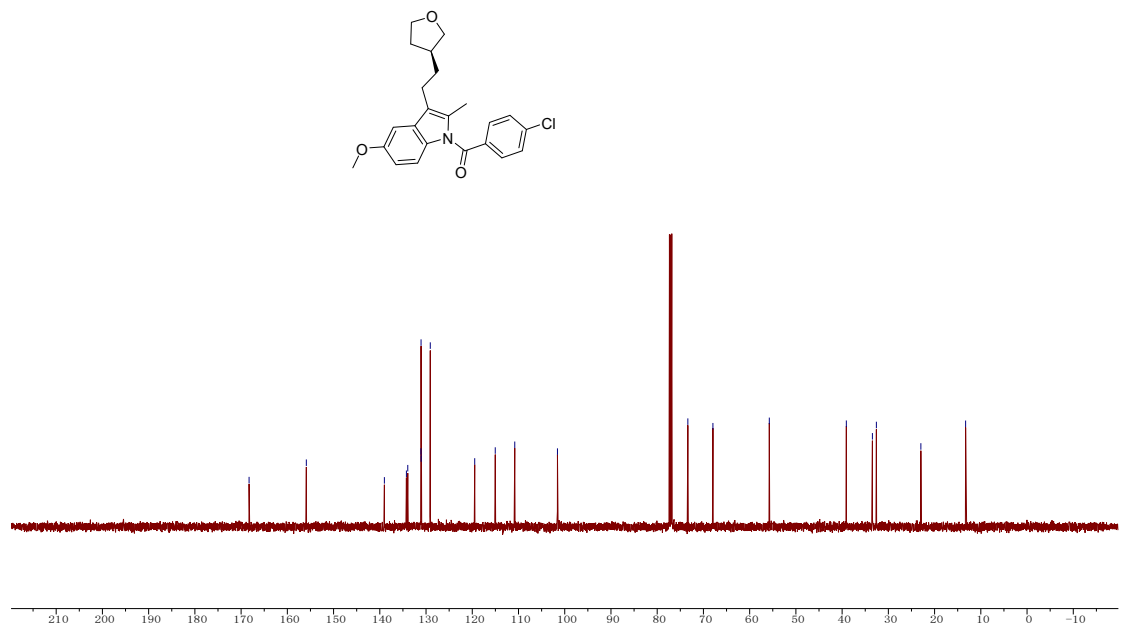

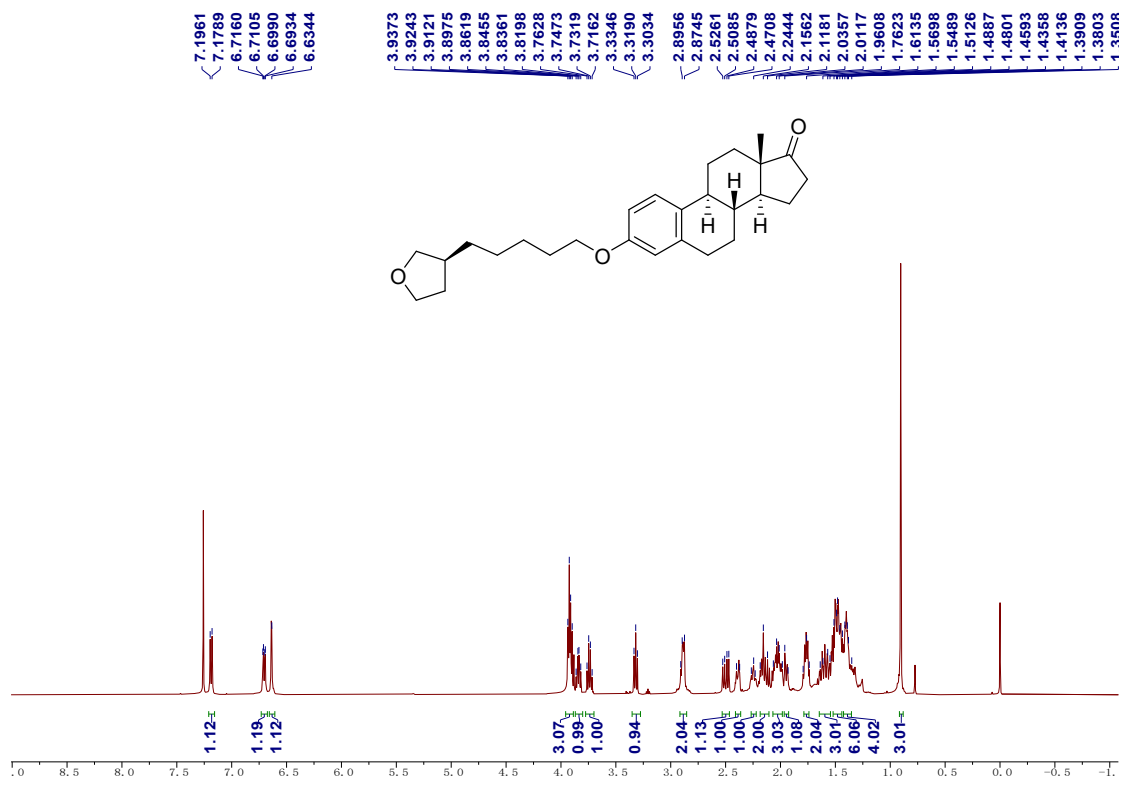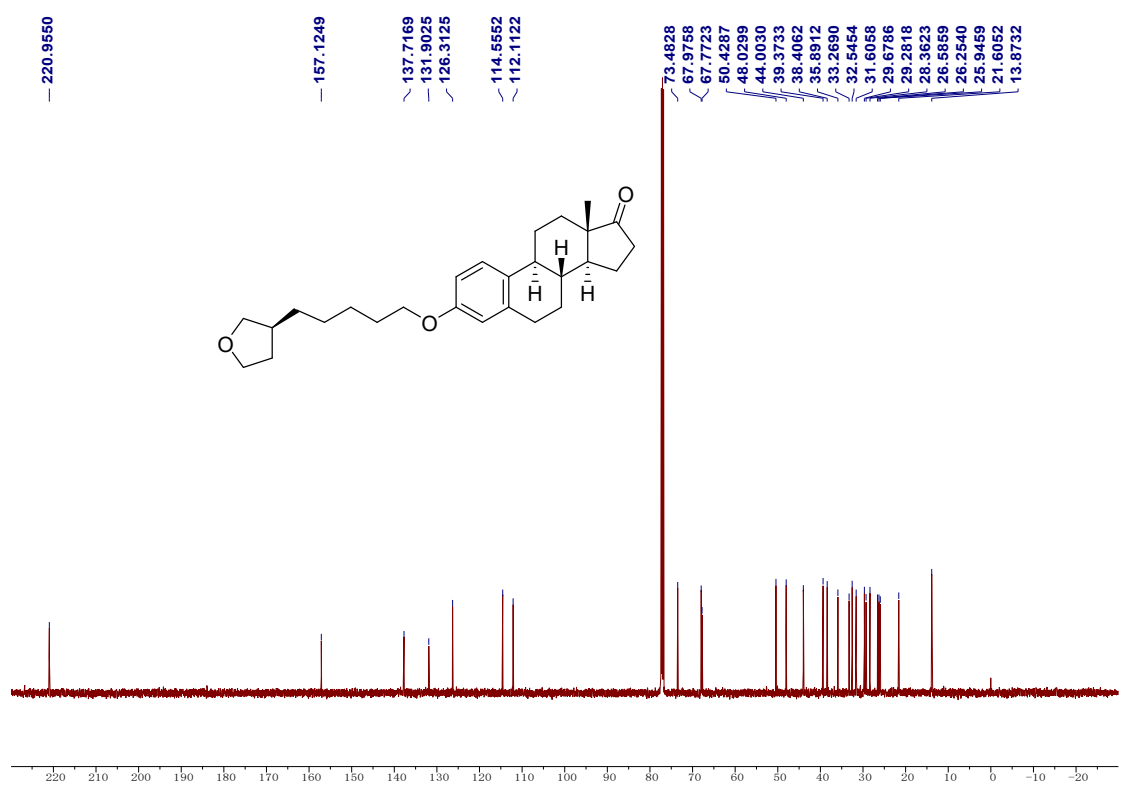

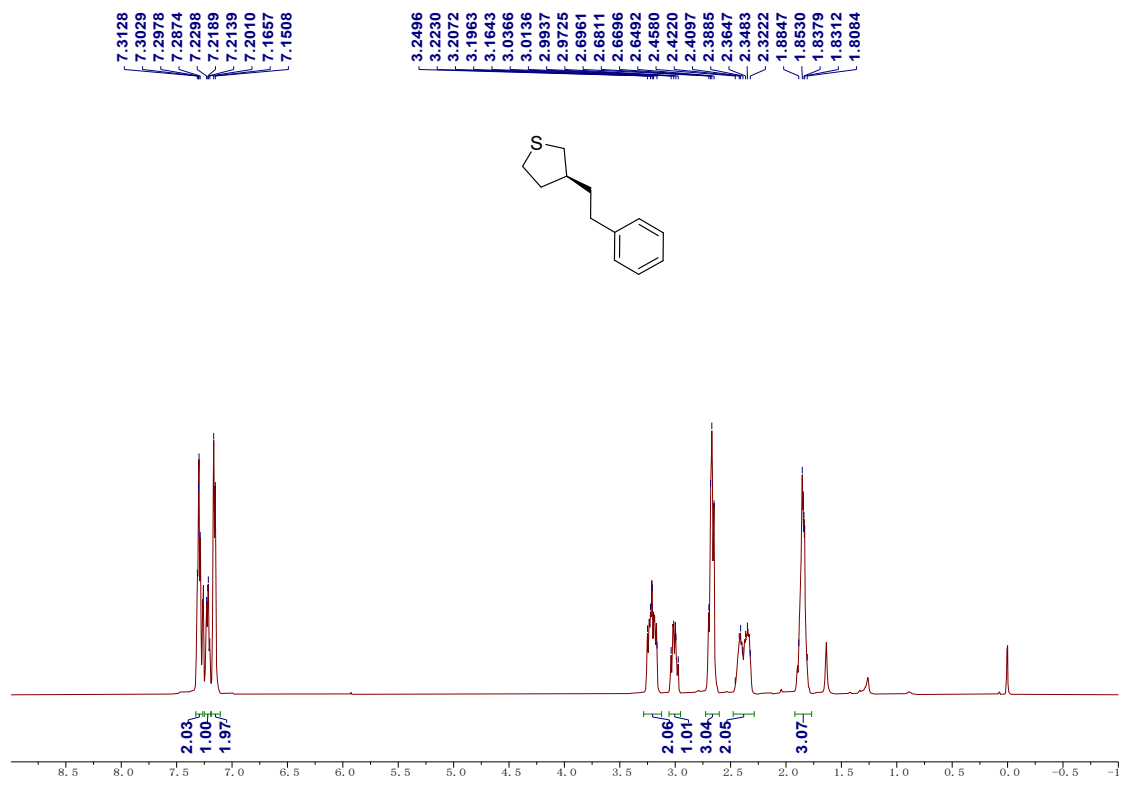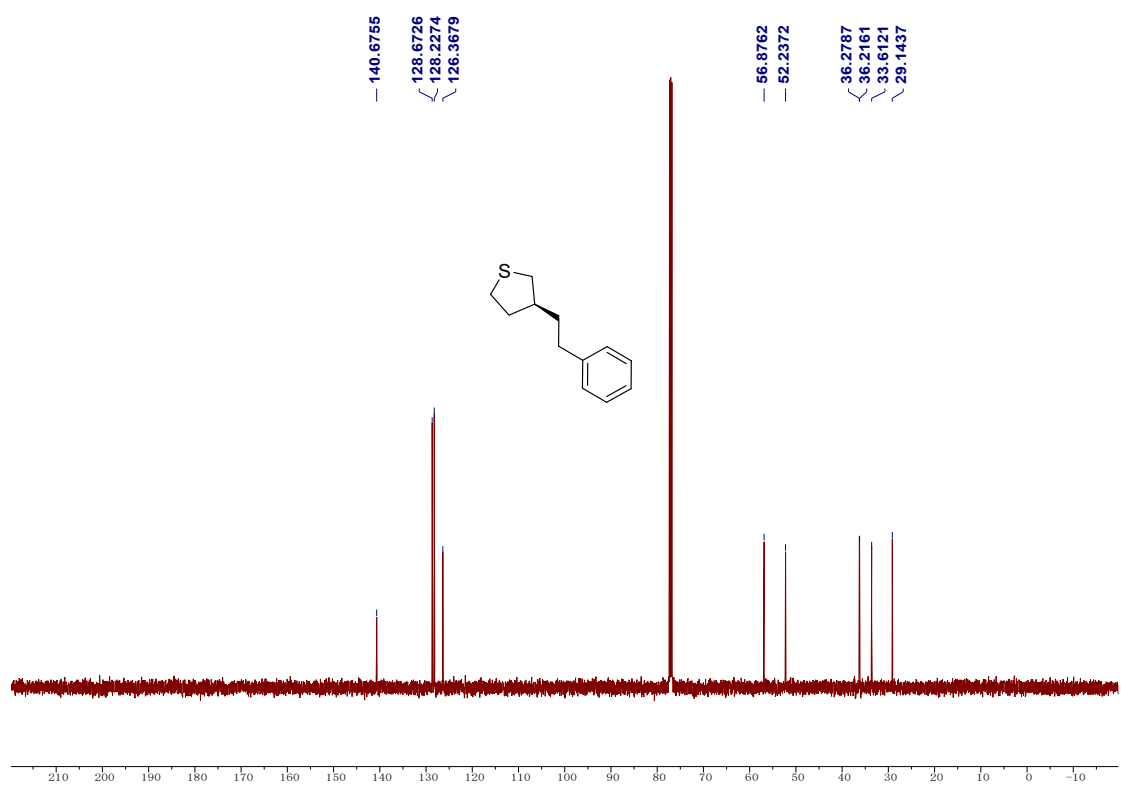

Supplement: d4sc01149j1.pdf [file d4sc01149j1.pdf]
